# Supplementary material for: High Atlastin 2-2 (ATL2-2) Expression Associates with Worse Prognosis in Estrogen-Receptor-Positive Breast Cancer
Source: Genes (Basel). 2023 Jul 29;14(8):1559. doi: 10.3390/genes14081559 (PMC10454310; doi:10.3390/genes14081559)
Supplement: Supplementary file 1 [file genes-14-01559-s001.zip › Supplement_Tables.xlsx]

## Sheet: Table S1
	Immunohistochemistry with ATL2 antibody: Scoring scheme								Immunohistochemistry scores for tumor and normal breast
										Score
	Weak	Medium	Strong	Score					Id no.: tumor-normal pair	Tumor	Normal
	0			0					1	4	0
	W5			1					2	3	0
	-	-		1					3	3	0
	W50	M25		2					4	4	0
	-	-	-	2					5	3	0
	W100	M50	S25	3					6	2	0
		-	-	3					7	1	0
		M100	S50	4					8	1	0
			-	4					9	2	0
			S100	4					10	2	0
									11	1	0
	Intensity of antibody stain: 0 = none, W=weak, M=medium, S=strong								12	2	0
	Area of antibody stain: numbers denote %								13	2	0

## Sheet: Table S2
Clinical and pathological characteristics of breast cancer Cohort 1
		135	median (25 and 75%)
Age				0.025
	< 50	52	0.209 (-0.263, 0.951)
	≥ 50	83	-0.182 (-0.853, 0.545)
Estrogen receptor				0.089
	Negative	47	0.234 (-0.297, 0.973)
	Positive	86	-0.154 (-0.901, 0.391)
	Unknown	2
Progesterone receptor				0.755
	Negative	63	0.184 (-0.426, 0.969)
	Positive	67	-0.125 (-0.754, 0.428)
	Unknown	5
HER2 status				0.992
	Negative	111	-0.093 (-0.754, 0.608)
	Positive	23	0.060 (-0.265, 0.706)
	Unknown	1
Tumor size				0.030
	≤ 20	41	-0.349 (-0.740, 0.184)
	> 20	94	0.063 (-0.554, 0.834)
	Unknown	0
Histologic Grade				0.045
	1	12	-0.079 (-0.552, 0.088)
	2	75	-0.208 (-0.853, 0.451)
	3	48	0.147 (-0.277, 1.089)
	Unknown	0
Ki67				0.064
	1	93	-0.094 (-0.747, 0.457)
	2	25	0.048 (-0.530, 0.789)
	3	14	0.973 (-0.132, 1.214)
	Unknown	3
Nodes				0.984
	Negative	52	0.158 (-0.449, 1.030)
	Positive	69	0.000 (-0.730, 0.575)
	Unknown	14
Histology subtype				0.152
	Ductal	117	0.040 (-0.574, 0.575)
	Ductal_lobular	1	1565
	Ductal_mucinous	1	-1314
	Lobular	10	-0.835 (-1.403, -0.137)
	Medullary	4	1.164 (1.018, 1.443)
	Metaplastic	0	NA
	Metastasis_adenocarcinoma_breast_mucinous	1	-0.412
	Mucinous	1	-0.208
Molecular subtype				0.016
	Basal	24	0.973 (0.166, 1.569)
	ERBB2	14	0.063 (-0.262, 0.272)
	LumA	39	-0.359 (-0.853, 0.077)
	LumB	28	0.275 (-1.043, 1.024)
	Normal	12	-0.181 (-0.901, -0.052)
	unclassified	11	-0.412 (-0.944, -0.153)
	Unknown	7

## Sheet: Table S3
Clinical and pathological characteristics of breast cancer Cohort 2
		n=263	median (25 and 75%)	p-value
Age				0.489
	< 50	62	0.025 (-0.389, 0.752)
	≥ 50	201	-0.023(-0.722, 0.685)
Estrogen receptor				3.75e-5
	Negative	70	0.553 (0.054, 1.084)
	Positive	188	-0.172 (-0.791, 0.397)
	Unknown	5
Progesterone receptor				0.001
	Negative	86	0.535 (-0.040, 1.022)
	Positive	171	-0.172 (-0.812, 0.392)
	Unknown	6
HER2 status				0.305
	Negative	163	-0.009 (-0.607, 0.695)
	Positive	42	-0.010 (-0.581, 0.577)
	Unknown	58
Tumor size				0.483
	≤ 20	79	0.037 (-0.579, 0.838)
	> 20	183	-0.004 (-0.659, 0.691)
	Unknown	1
Histologic Grade				0.005
	1	29	-0.157 (-0.613, 0.401)
	2	120	-0.176 (-0.828, 0.324)
	3	101	0.376 (-0.271, 1.102)
	Unknown	13
Nodes				0.093
	Negative	102	0.148 (-0.581, 0.912)
	Positive	135	-0.041 (-0.656, 0.593)
	Unknown	26
Histology subtype				0.705
	Ductal	221	0.016 (-0.601, 0.788)
	Ductal_lobular	6	0.013 (-0.144, 0.260)
	Ductal_mixed	1	0.313
	Lobular	26	-0.200 (-0.833, 0.333)
	Lobular_mixed	1	-0.121
	Medullary	1	0.834
	Metaplastic	1	0.938
	Mucinous	5	0.280 (0.164, 0.499)
	Sarcoma	0	NA
	Tubular	1	-1749

## Sheet: Table S4
Clinical and pathological characteristics of TCGA breast cancer cohort
		n=820	median (25 and 75%)	p-value
Age				0.379
	< 50	230	-0.045 (-1.951, 0.935)
	≥ 50	590	0.031 (-1.515, 0.984)
	Range (yrs)		26 - 90 yrs; med 58, mean 57.87
Estrogen receptor				0.083
	Negative	185	0.228 (-1.834, 1.589)
	Positive	595	-0.011 (-1.532, 0.854)
	Unknown	40
Progesterone receptor				0.022
	Negative	266	0.224 (-1.588, 1.297)
	Positive	512	-0.017 (-1.661, 0.846)
	Unknown	42
HER2 status				0.302
	Negative	425	0.150 (-1.384, 1.055)
	Positive	124	-0.020 (-1.552, 0.905)
	Unknown	271
Disease stage				0.928
	Stage I	137	0.071 (-1.588, 1.002)
	Stage II	473	-0.006 (-1.713, 0.936)
	Stage III	182	-0.047 (-1.688, 0.972)
	Stage IV	14	0.146 (-1.371, 0.762)
	Stage X	10	0.367 (-0.943, 1.415)
	Unknown	4
Tumor stage				0.562
	T1	213	0.195 (-1.492, 1.002)
	T2	472	-0.042 (-1.765, 0.979)
	T3	101	-0.412 (-1.492, 0.882)
	T4	31	0.301 (-0.875, 1.062)
	TX	3	-0.983 (-1.212, -0.904)
Nodal status				0.677
	N0	388	-0.022 (-1.676, 0.950)
	N1	273	0.087 (-1.713, 0.935)
	N2	89	0.273 (-1.489, 1.254)
	N3	55	-0.566 (-1.666, 0.686)
	NX	15	-0.088 (-1.049, 1.458)
Nodes				0.921
	Negative	388	-0.022 (-1.676, 0.950)
	Positive	432	0.067 (-1.661, 0.976)
Metastasis				0.011
	Negative	698	0.090 (-1.582, 1.028)
	Positive	122	-0.505 ( -1.820, 0.660)
Tumor type				0.619
	Breast Invasive Carcinoma	1*	3294
	Infiltrating Carcinoma (NOS)	0	0
	Invasive Ductal Carcinoma	610	-0.005 ( -1.689, 0.984)
	Invasive Lobular Carcinoma	132	-0.100 ( -1.579, 0.772)
	Medullary Carcinoma	5	2.346 ( -3.252, 3.035)
	Metaplastic Carcinoma	4	-1.205 ( -2.267, 0.227)
	Mixed Histology (NOS)	25	0.356 (-0.758, 1.036)
	Mucinous Carcinoma	12	0.350 (-0.876, 0.968)
	Other	31	0.443 (-2.099, 1.145)
Molecular subtype				0.295
	Basal-like	140	0.382 (-1.930, 1.731)
	HER2-enriched	62	-0.099 (-1.804, 1.347)
	Luminal A	373	0.031 (-1.452, 0.784)
	Luminal B	149	-0.039 (-1.956, 0.977)
	Normal-like	27	-0.020 (-1.793, 0.807)
	Unknown	69
*The p-value was calculated without this samples

## Sheet: Table S5
Clinical and pathological characteristics of METABRIC breast cancer cohort
		n=1902	median (25 and 75%)	p-value
Age				2.3e-12
	< 50	410	0.084 (-0.491, 1.007)
	≥ 50	1492	-0.196 (-0.691, 0.309)
	Range (yrs)		21.93 - 96.29 yrs; Med 61.78, Mean 61.10
Estrogen receptor				<2.2e-16
	Negative	428	0.876 (0.074, 1.811)
	Positive	1444	-0.304 (-0.747, 0.092)
	Unknown	30
Progesterone receptor				<2.2e-16
	Negative	894	0.122 (-0.466, 0.992)
	Positive	1008	-0.314 (-0.756, 0.059)
	Unknown	0
HER2 status				0.239
	Negative	1666	-0.183 (-0.680, 0.378)
	Positive	236	0.049 (-0.445, 0.483)
	Unknown	0
Tumor size (mm)				0.006
	≤ 20	820	-0.209 (-0.711, 0.351)
	> 20	1062	-0.132 (-0.616, 0.420)
	Unknown	20
Stage				0.039
	0	4*	0.147 (-0.292, 0.599)
	1	474	-0.243 (-0.729, 0.334)
	2	800	-0.165 (-0.660, 0.431)
	3	115	-0.068 (-0.579, 0.514)
	4	9	-0.428 (-0.526, -0.107)
	Unknown	500
Grade				<2e-16
	1	165	-0.352 (-0.778, -0.034)
	2	740	-0.312 (-0.763, - 0.082)
	3	926	0.089 (-0.465, - 0.941)
	Unknown	71
Nodal status				0.010
	Negative	992	-0.166 (-0.682 - 0.375)
	Positive	910	-0.149 (-0.626 - 0.451)
	Unknown	0
Metastasis
	Negative
	Positive
Histological tumor type				5.74e-9
	BENIGN	1*	0.461
	DCIS	2*	0.812 (0.599, 1.025)
	IDC	1501	-0.151 (-0.656, 0.429)
	IDC-MED	31	1.246 (0.232, 1.904)
	IDC-MUC	42	-0.254 (-0.618, 0.304)
	IDC-TUB	67	-0.329 (-0.761, 0.086)
	IDC+ILC	87	-0.301 (-0.620, 0.141)
	ILC	141	-0.192 (-0.629, 0.160)
	INVASIVE TUMOR	9	-0.032(-0.729, 0.518)
	OTHER INVASIVE	19	-0.092 (-0.428, 0.401)
Molecular subtype				<2e-16
	Basal	198	1.756 (-0.493, 2.448)
	Claudin-low	199	0.148 (-0.493, 1.311)
	Her2	220	-0.118 (-0.681, -0.386)
	Luminal A	678	-0.416 (-0.800, -0.054)
	Luminal B	461	-0.174 (-0.639, 0.215)
	NC	6	-0.838 (-1.152, -0.468)
	Normal	140	-0.098 (-0.418, 0.348)
	Unknown	0
*The p-value was calculated without this samples

## Sheet: Table S6
METABRIC: breast cancer patients with estrogen receptor positive-luminal B tumors
	HR	Confidence interval	p-value
ATL2-2*	1524	1.096 - 2.118	0.012
**with age Dx	1508	1.084 - 2.096	0.015
with PR	1528	1.099 - 2.124	0.012
with HER2	1504	1.081 - 2.090	0.015
**with size	1459	1.047 - 2.033	0.026
with grade	1478	1.059 - 2.064	0.022
with stage	1583	1.086 - 2.307	0.017
with nodes	1582	1.138 - 2.199	0.006
Cox regression analysis
*ATL2-2 mRNA values were divided according to the maxstat function in R.
**Continuous variable

## Sheet: Table S7
GSEA from Hallmark pathways from genes that positively correlated with ATL2-2; whole METABRIC cohort
Hallmark pathway	Link to MSigDB	SIZE	ES	NES	NOM p-val	FDR q-val	FWER p-val	RANK AT MAX	LEADING EDGE
HALLMARK_E2F_TARGETS	https://www.gsea-msigdb.org/gsea/msigdb/cards/HALLMARK_E2F_TARGETS	174	0.749226	2.57015	0	0	0	2176	tags=65%, list=14%, signal=75%
HALLMARK_MYC_TARGETS_V1	https://www.gsea-msigdb.org/gsea/msigdb/cards/HALLMARK_MYC_TARGETS_V1	178	0.722087	2.48047	0	0	0	2415	tags=66%, list=16%, signal=77%
HALLMARK_G2M_CHECKPOINT	https://www.gsea-msigdb.org/gsea/msigdb/cards/HALLMARK_G2M_CHECKPOINT	169	0.714942	2.44264	0	0	0	1951	tags=54%, list=13%, signal=61%
HALLMARK_MTORC1_SIGNALING	https://www.gsea-msigdb.org/gsea/msigdb/cards/HALLMARK_MTORC1_SIGNALING	183	0.617703	2.138	0	0	0	1952	tags=48%, list=13%, signal=54%
HALLMARK_INTERFERON_GAMMA_RESPONSE	https://www.gsea-msigdb.org/gsea/msigdb/cards/HALLMARK_INTERFERON_GAMMA_RESPONSE	188	0.592326	2.02603	0	0	0	2429	tags=45%, list=16%, signal=53%
HALLMARK_INTERFERON_ALPHA_RESPONSE	https://www.gsea-msigdb.org/gsea/msigdb/cards/HALLMARK_INTERFERON_ALPHA_RESPONSE	86	0.627454	1.96238	0	0	0	1704	tags=41%, list=11%, signal=46%
HALLMARK_MYC_TARGETS_V2	https://www.gsea-msigdb.org/gsea/msigdb/cards/HALLMARK_MYC_TARGETS_V2	51	0.651796	1.87483	0	0.000168367	0.001	2523	tags=57%, list=17%, signal=68%
HALLMARK_TNFA_SIGNALING_VIA_NFKB	https://www.gsea-msigdb.org/gsea/msigdb/cards/HALLMARK_TNFA_SIGNALING_VIA_NFKB	186	0.522851	1.79867	0	0.000417886	0.003	2515	tags=40%, list=17%, signal=48%
HALLMARK_MITOTIC_SPINDLE	https://www.gsea-msigdb.org/gsea/msigdb/cards/HALLMARK_MITOTIC_SPINDLE	181	0.489387	1.68572	0	0.00205742	0.016	2316	tags=31%, list=15%, signal=36%
HALLMARK_UNFOLDED_PROTEIN_RESPONSE	https://www.gsea-msigdb.org/gsea/msigdb/cards/HALLMARK_UNFOLDED_PROTEIN_RESPONSE	102	0.507497	1.65122	0	0.00287092	0.025	2735	tags=44%, list=18%, signal=53%
HALLMARK_OXIDATIVE_PHOSPHORYLATION	https://www.gsea-msigdb.org/gsea/msigdb/cards/HALLMARK_OXIDATIVE_PHOSPHORYLATION	168	0.475954	1.6198	0	0.00362056	0.035	3084	tags=46%, list=20%, signal=57%
HALLMARK_INFLAMMATORY_RESPONSE	https://www.gsea-msigdb.org/gsea/msigdb/cards/HALLMARK_INFLAMMATORY_RESPONSE	186	0.465897	1.59426	0	0.00523661	0.054	2390	tags=32%, list=16%, signal=37%
HALLMARK_CHOLESTEROL_HOMEOSTASIS	https://www.gsea-msigdb.org/gsea/msigdb/cards/HALLMARK_CHOLESTEROL_HOMEOSTASIS	68	0.522994	1.57723	0.00702988	0.00642048	0.07	1723	tags=37%, list=11%, signal=41%
HALLMARK_ALLOGRAFT_REJECTION	https://www.gsea-msigdb.org/gsea/msigdb/cards/HALLMARK_ALLOGRAFT_REJECTION	178	0.455634	1.56937	0.00157978	0.00675637	0.079	3452	tags=39%, list=23%, signal=50%
HALLMARK_REACTIVE_OXYGEN_SPECIES_PATHWAY	https://www.gsea-msigdb.org/gsea/msigdb/cards/HALLMARK_REACTIVE_OXYGEN_SPECIES_PATHWAY	41	0.512815	1.43521	0.026975	0.0280277	0.318	1228	tags=24%, list=8%, signal=26%
HALLMARK_IL6_JAK_STAT3_SIGNALING	https://www.gsea-msigdb.org/gsea/msigdb/cards/HALLMARK_IL6_JAK_STAT3_SIGNALING	82	0.458728	1.43378	0.0142602	0.0264698	0.319	3738	tags=46%, list=25%, signal=61%
HALLMARK_PROTEIN_SECRETION	https://www.gsea-msigdb.org/gsea/msigdb/cards/HALLMARK_PROTEIN_SECRETION	92	0.454236	1.42144	0.0193322	0.0282217	0.35	3112	tags=46%, list=21%, signal=57%
HALLMARK_GLYCOLYSIS	https://www.gsea-msigdb.org/gsea/msigdb/cards/HALLMARK_GLYCOLYSIS	188	0.410208	1.40703	0.00660066	0.0320248	0.408	1829	tags=28%, list=12%, signal=31%
HALLMARK_HYPOXIA	https://www.gsea-msigdb.org/gsea/msigdb/cards/HALLMARK_HYPOXIA	182	0.405782	1.39593	0.0066778	0.0336583	0.45	1375	tags=24%, list=9%, signal=26%
HALLMARK_SPERMATOGENESIS	https://www.gsea-msigdb.org/gsea/msigdb/cards/HALLMARK_SPERMATOGENESIS	124	0.418774	1.37315	0.0175131	0.0398064	0.521	1900	tags=19%, list=13%, signal=22%
HALLMARK_DNA_REPAIR	https://www.gsea-msigdb.org/gsea/msigdb/human/geneset/HALLMARK_DNA_REPAIR.html	131	0.409909	1.36814	0.0162455	0.0406877	0.545	2992	tags=39%, list=20%, signal=48%
HALLMARK_COMPLEMENT	https://www.gsea-msigdb.org/gsea/msigdb/human/geneset/HALLMARK_complement.html	185	0.385354	1.32534	0.0221088	0.0589856	0.702	2385	tags=26%, list=16%, signal=30%
HALLMARK_PI3K_AKT_MTOR_SIGNALING	https://www.gsea-msigdb.org/gsea/msigdb/human/geneset/HALLMARK_PI3K_AKT_MTOR_SIGNALING.html	102	0.402502	1.27996	0.0659722	0.086629	0.852	3629	tags=40%, list=24%, signal=53%
HALLMARK_WNT_BETA_CATENIN_SIGNALING	https://www.gsea-msigdb.org/gsea/msigdb/human/geneset/HALLMARK_WNT_BETA_CATENIN_SIGNALING.html	40	0.443349	1.23623	0.137011	0.120787	0.939	1304	tags=18%, list=9%, signal=19%
HALLMARK_P53_PATHWAY	https://www.gsea-msigdb.org/gsea/msigdb/human/geneset/HALLMARK_P53_PATHWAY.html	179	0.352095	1.2039	0.0903226	0.152726	0.975	1743	tags=22%, list=12%, signal=24%
HALLMARK_UV_RESPONSE_UP	https://www.gsea-msigdb.org/gsea/msigdb/human/geneset/HALLMARK_UV_RESPONSE_UP.html	145	0.357877	1.20213	0.114238	0.148985	0.976	2440	tags=30%, list=16%, signal=35%
HALLMARK_IL2_STAT5_SIGNALING	https://www.gsea-msigdb.org/gsea/msigdb/human/geneset/HALLMARK_IL2_STAT5_SIGNALING.html	182	0.345036	1.17821	0.112957	0.172784	0.989	1705	tags=22%, list=11%, signal=24%
HALLMARK_KRAS_SIGNALING_UP	https://www.gsea-msigdb.org/gsea/msigdb/human/geneset/HALLMARK_KRAS_SIGNALING_UP.html	184	0.339143	1.16459	0.122611	0.182955	0.993	2756	tags=29%, list=18%, signal=35%
HALLMARK_TGF_BETA_SIGNALING	https://www.gsea-msigdb.org/gsea/msigdb/human/geneset/HALLMARK_TGF_BETA_SIGNALING.html	53	0.398152	1.15697	0.228164	0.18725	0.994	2669	tags=30%, list=18%, signal=37%
HALLMARK_ADIPOGENESIS	https://www.gsea-msigdb.org/gsea/msigdb/human/geneset/HALLMARK_ADIPOGENESIS.html	176	0.33353	1.14559	0.159091	0.19686	0.996	3080	tags=35%, list=20%, signal=44%
HALLMARK_APOPTOSIS	https://www.gsea-msigdb.org/gsea/msigdb/human/geneset/HALLMARK_APOPTOSIS.html	152	0.31765	1.06504	0.296928	0.330876	1	2908	tags=34%, list=19%, signal=41%
HALLMARK_APICAL_JUNCTION	https://www.gsea-msigdb.org/gsea/msigdb/human/geneset/HALLMARK_APICAL_JUNCTION.html	180	0.301532	1.03745	0.342561	0.375062	1	1764	tags=18%, list=12%, signal=20%
HALLMARK_HEDGEHOG_SIGNALING	https://www.gsea-msigdb.org/gsea/msigdb/human/geneset/HALLMARK_HEDGEHOG_SIGNALING.html	33	0.327063	0.855431	0.714542	0.814651	1	2348	tags=27%, list=16%, signal=32%

## Sheet: Table S8
GSEA from Hallmark pathways from genes that positively correlated with ATL2-2; METABRIC Estrogen receptor positive - luminal B
Hallmark pathway	Link to MSigDB	SIZE	ES	NES	NOM p-val	FDR q-val	FWER p-val	RANK AT MAX	LEADING EDGE
HALLMARK_MYC_TARGETS_V1	https://www.gsea-msigdb.org/gsea/msigdb/cards/HALLMARK_MYC_TARGETS_V1	179	0.587881	2.20558	0	0	0	2453	tags=46%, list=16%, signal=54%
HALLMARK_INTERFERON_ALPHA_RESPONSE	https://www.gsea-msigdb.org/gsea/msigdb/cards/HALLMARK_INTERFERON_ALPHA_RESPONSE	86	0.587356	2.02723	0	0	0	1490	tags=37%, list=10%, signal=41%
HALLMARK_E2F_TARGETS	https://www.gsea-msigdb.org/gsea/msigdb/cards/HALLMARK_E2F_TARGETS	175	0.538077	2.00633	0	0	0	2434	tags=42%, list=16%, signal=50%
HALLMARK_MTORC1_SIGNALING	https://www.gsea-msigdb.org/gsea/msigdb/cards/HALLMARK_MTORC1_SIGNALING	182	0.477602	1.80065	0	0.000608077	0.002	2576	tags=38%, list=17%, signal=45%
HALLMARK_PROTEIN_SECRETION	https://www.gsea-msigdb.org/gsea/msigdb/cards/HALLMARK_PROTEIN_SECRETION	93	0.507326	1.73568	0	0.00165917	0.007	2486	tags=46%, list=16%, signal=55%
HALLMARK_OXIDATIVE_PHOSPHORYLATION	https://www.gsea-msigdb.org/gsea/msigdb/cards/HALLMARK_OXIDATIVE_PHOSPHORYLATION	169	0.465689	1.7281	0	0.00161749	0.008	2473	tags=36%, list=16%, signal=43%
HALLMARK_TGF_BETA_SIGNALING	https://www.gsea-msigdb.org/gsea/msigdb/human/geneset/HALLMARK_TGF_BETA_SIGNALING	53	0.523584	1.65247	0	0.00419221	0.023	1303	tags=30%, list=9%, signal=33%
HALLMARK_DNA_REPAIR	https://www.gsea-msigdb.org/gsea/msigdb/human/geneset/HALLMARK_DNA_REPAIR	134	0.452633	1.63288	0	0.00495207	0.031	2622	tags=37%, list=17%, signal=44%
HALLMARK_CHOLESTEROL_HOMEOSTASIS	https://www.gsea-msigdb.org/gsea/msigdb/cards/HALLMARK_CHOLESTEROL_HOMEOSTASIS	69	0.485696	1.58964	0.00402414	0.00737248	0.051	1800	tags=33%, list=12%, signal=38%
HALLMARK_UNFOLDED_PROTEIN_RESPONSE	https://www.gsea-msigdb.org/gsea/msigdb/cards/HALLMARK_UNFOLDED_PROTEIN_RESPONSE	103	0.452711	1.5852	0.0040404	0.00685134	0.053	2864	tags=42%, list=19%, signal=51%
HALLMARK_INTERFERON_GAMMA_RESPONSE	https://www.gsea-msigdb.org/gsea/msigdb/cards/HALLMARK_INTERFERON_GAMMA_RESPONSE	188	0.411685	1.54754	0	0.0102799	0.088	3246	tags=44%, list=21%, signal=55%
HALLMARK_G2M_CHECKPOINT	https://www.gsea-msigdb.org/gsea/msigdb/cards/HALLMARK_G2M_CHECKPOINT	170	0.398717	1.48874	0	0.0202693	0.177	2837	tags=38%, list=19%, signal=46%
HALLMARK_MYC_TARGETS_V2	https://www.gsea-msigdb.org/gsea/msigdb/cards/HALLMARK_MYC_TARGETS_V2	51	0.470566	1.46797	0.0206612	0.0230334	0.215	2286	tags=31%, list=15%, signal=37%
HALLMARK_TNFA_SIGNALING_VIA_NFKB	https://www.gsea-msigdb.org/gsea/msigdb/cards/HALLMARK_TNFA_SIGNALING_VIA_NFKB	185	0.38924	1.46634	0.00218341	0.0217817	0.217	2662	tags=34%, list=18%, signal=40%
HALLMARK_GLYCOLYSIS	https://www.gsea-msigdb.org/gsea/msigdb/cards/HALLMARK_GLYCOLYSIS	186	0.38702	1.44851	0.00198807	0.0247461	0.254	1704	tags=23%, list=11%, signal=25%
HALLMARK_ADIPOGENESIS	https://www.gsea-msigdb.org/gsea/msigdb/human/geneset/HALLMARK_ADIPOGENESIS	177	0.381609	1.41839	0.0041841	0.0300237	0.32	1916	tags=27%, list=13%, signal=30%
HALLMARK_PI3K_AKT_MTOR_SIGNALING	https://www.gsea-msigdb.org/gsea/msigdb/human/geneset/HALLMARK_PI3K_AKT_MTOR_SIGNALING	102	0.408167	1.40703	0.0148305	0.0320629	0.358	2721	tags=33%, list=18%, signal=40%
HALLMARK_BILE_ACID_METABOLISM	https://www.gsea-msigdb.org/gsea/msigdb/human/geneset/HALLMARK_BILE_ACID_METABOLISM	108	0.393244	1.39506	0.0172786	0.0345966	0.399	1850	tags=23%, list=12%, signal=26%
HALLMARK_FATTY_ACID_METABOLISM	https://www.gsea-msigdb.org/gsea/msigdb/human/geneset/HALLMARK_FATTY_ACID_METABOLISM	144	0.377241	1.38091	0.00619835	0.0385892	0.457	2100	tags=29%, list=14%, signal=34%
HALLMARK_REACTIVE_OXYGEN_SPECIES_PATHWAY	https://www.gsea-msigdb.org/gsea/msigdb/cards/HALLMARK_REACTIVE_OXYGEN_SPECIES_PATHWAY	42	0.454799	1.37792	0.0515873	0.037871	0.467	1820	tags=38%, list=12%, signal=43%
HALLMARK_PEROXISOME	https://www.gsea-msigdb.org/gsea/msigdb/cards/HALLMARK_PEROXISOME	98	0.38044	1.32284	0.0423077	0.0600757	0.64	2569	tags=37%, list=17%, signal=44%
HALLMARK_HYPOXIA	https://www.gsea-msigdb.org/gsea/msigdb/cards/HALLMARK_HYPOXIA	182	0.351031	1.3206	0.0244399	0.0586966	0.649	1714	tags=20%, list=11%, signal=23%
HALLMARK_ESTROGEN_RESPONSE_LATE	https://www.gsea-msigdb.org/gsea/msigdb/cards/HALLMARK_ESTROGEN_RESPONSE_LATE	187	0.345848	1.3081	0.0270833	0.0629791	0.686	2273	tags=30%, list=15%, signal=35%
HALLMARK_XENOBIOTIC_METABOLISM	https://www.gsea-msigdb.org/gsea/msigdb/cards/HALLMARK_XENOBIOTIC_METABOLISM	189	0.341272	1.28809	0.0398323	0.0725854	0.743	2317	tags=26%, list=15%, signal=30%
HALLMARK_APOPTOSIS	https://www.gsea-msigdb.org/gsea/msigdb/human/geneset/HALLMARK_APOPTOSIS	152	0.33757	1.2398	0.0591837	0.105487	0.892	1752	tags=27%, list=12%, signal=30%
HALLMARK_ESTROGEN_RESPONSE_EARLY	https://www.gsea-msigdb.org/gsea/msigdb/human/geneset/HALLMARK_ESTROGEN_RESPONSE_EARLY	180	0.332113	1.23876	0.0373281	0.102147	0.893	1107	tags=20%, list=7%, signal=21%
HALLMARK_HEME_METABOLISM	https://www.gsea-msigdb.org/gsea/msigdb/human/geneset/HALLMARK_HEME_METABOLISM	180	0.326312	1.22854	0.066	0.106533	0.909	1928	tags=19%, list=13%, signal=21%
HALLMARK_ANDROGEN_RESPONSE	https://www.gsea-msigdb.org/gsea/msigdb/human/geneset/HALLMARK_ANDROGEN_RESPONSE	92	0.33135	1.13163	0.213573	0.211465	0.989	1911	tags=27%, list=13%, signal=31%
HALLMARK_P53_PATHWAY	https://www.gsea-msigdb.org/gsea/msigdb/human/geneset/HALLMARK_P53_PATHWAY	179	0.276833	1.03233	0.333333	0.395873	1	2227	tags=19%, list=15%, signal=22%
HALLMARK_UV_RESPONSE_UP	https://www.gsea-msigdb.org/gsea/msigdb/human/geneset/HALLMARK_UV_RESPONSE_UP	145	0.265626	0.978012	0.485537	0.517246	1	2614	tags=25%, list=17%, signal=30%
HALLMARK_COMPLEMENT	https://www.gsea-msigdb.org/gsea/msigdb/human/geneset/HALLMARK_complement	185	0.260108	0.972209	0.520921	0.515324	1	2187	tags=19%, list=14%, signal=22%

## Sheet: Table S9
GSEA from Hallmark pathways from genes that positively correlated with ATL2-2; TCGA Estrogen receptor positive - luminal B
Hallmark pathway	Link to MSigDB	SIZE	ES	NES	NOM p-val	FDR q-val	FWER p-val	RANK AT MAX	LEADING EDGE
HALLMARK_E2F_TARGETS	https://www.gsea-msigdb.org/gsea/msigdb/cards/HALLMARK_E2F_TARGETS	194	0.646665	2.83804	0	0	0	3226	tags=57%, list=19%, signal=70%
HALLMARK_G2M_CHECKPOINT	https://www.gsea-msigdb.org/gsea/msigdb/cards/HALLMARK_G2M_CHECKPOINT	199	0.64302	2.83318	0	0	0	3251	tags=55%, list=19%, signal=67%
HALLMARK_MYC_TARGETS_V1	https://www.gsea-msigdb.org/gsea/msigdb/cards/HALLMARK_MYC_TARGETS_V1	197	0.456936	2.0066	0	0	0	3841	tags=40%, list=22%, signal=51%
HALLMARK_MITOTIC_SPINDLE	https://www.gsea-msigdb.org/gsea/msigdb/cards/HALLMARK_MITOTIC_SPINDLE	196	0.443266	1.93835	0	0	0	3393	tags=36%, list=20%, signal=44%
HALLMARK_PANCREAS_BETA_CELLS	https://www.gsea-msigdb.org/gsea/msigdb/cards/HALLMARK_PANCREAS BETA_CELLS	40	0.488373	1.63004	0.0132231	0.0118118	0.063	811	tags=23%, list=5%, signal=24%
HALLMARK_SPERMATOGENESIS	https://www.gsea-msigdb.org/gsea/msigdb/cards/HALLMARK_SPERMATOGENESIS	133	0.367586	1.5419	0.00327332	0.0276193	0.171	3384	tags=29%, list=20%, signal=36%
HALLMARK_ESTROGEN_RESPONSE_LATE	https://www.gsea-msigdb.org/gsea/msigdb/cards/HALLMARK_ESTROGEN_RESPONSE_LATE	199	0.334407	1.46375	0.00306748	0.0518434	0.336	1747	tags=22%, list=10%, signal=24%
HALLMARK_EPITHELIAL_MESENCHYMAL_TRANSITION	https://www.gsea-msigdb.org/gsea/msigdb/cards/HALLMARK_EPITHELIAL_MESENCHYMAL_TRANSITION	198	0.321312	1.40905	0.00469484	0.074913	0.492	2290	tags=23%, list=13%, signal=26%
HALLMARK_UV_RESPONSE_DN	https://www.gsea-msigdb.org/gsea/msigdb/cards/HALLMARK_SPERMATOGENESIS	142	0.331278	1.39571	0.0127389	0.0753206	0.537	3789	tags=33%, list=22%, signal=42%
HALLMARK_MYC_TARGETS_V2	https://www.gsea-msigdb.org/gsea/msigdb/cards/HALLMARK_MYC_TARGETS_V2	55	0.383298	1.34743	0.0774527	0.10725	0.692	4492	tags=33%, list=26%, signal=44%
HALLMARK_NOTCH_SIGNALING	https://www.gsea-msigdb.org/gsea/msigdb/cards/HALLMARK_NOTCH_SIGNALING	32	0.415235	1.33443	0.0912106	0.109746	0.734	2394	tags=22%, list=14%, signal=25%
HALLMARK_PROTEIN_SECRETION	https://www.gsea-msigdb.org/gsea/msigdb/cards/HALLMARK_PROTEIN_SECRETION	95	0.327225	1.29984	0.066343	0.140019	0.849	3951	tags=27%, list=23%, signal=35%
HALLMARK_ESTROGEN_RESPONSE_EARLY	https://www.gsea-msigdb.org/gsea/msigdb/cards/HALLMARK_ESTROGEN_RESPONSE_EARLY	195	0.288444	1.2715	0.0551181	0.163666	0.904	1575	tags=17%, list=9%, signal=19%
HALLMARK_UV_RESPONSE_UP	https://www.gsea-msigdb.org/gsea/msigdb/human/geneset/HALLMARK_UV_RESPONSE_UP	158	0.287848	1.23474	0.0913462	0.203446	0.958	2819	tags=23%, list=16%, signal=28%
HALLMARK_KRAS_SIGNALING_DN	https://www.gsea-msigdb.org/gsea/msigdb/human/geneset/HALLMARK_KRAS_SIGNALING_ON	195	0.278711	1.21402	0.0866142	0.223871	0.977	1216	tags=13%, list=7%, signal=14%
HALLMARK_TGF_BETA_SIGNALING	https://www.gsea-msigdb.org/gsea/msigdb/human/geneset/HALLMARK_TGF_BETA_SIGNALING	54	0.340684	1.21038	0.186386	0.217928	0.979	5073	tags=44%, list=30%, signal=63%
HALLMARK_APICAL_JUNCTION	https://www.gsea-msigdb.org/gsea/msigdb/human/geneset/HALLMARK_APICAL_JUNCTION	195	0.251663	1.10422	0.217656	0.431254	1	4447	tags=36%, list=26%, signal=49%
HALLMARK_MYOGENESIS	https://www.gsea-msigdb.org/gsea/msigdb/human/geneset/HALLMARK_MYOGENESIS	199	0.244297	1.07469	0.29742	0.489623	1	2266	tags=15%, list=13%, signal=17%
HALLMARK_GLYCOLYSIS	https://www.gsea-msigdb.org/gsea/msigdb/cards/HALLMARK_GLYCOLYSIS	194	0.239134	1.05264	0.328682	0.525165	1	2160	tags=17%, list=13%, signal=19%
HALLMARK_ANGIOGENESIS	https://www.gsea-msigdb.org/gsea/msigdb/cards/HALLMARK_ANGIOGENESIS	36	0.309156	1.02912	0.431065	0.567007	1	2024	tags=22%, list=12%, signal=25%
HALLMARK_PEROXISOME	https://www.gsea-msigdb.org/gsea/msigdb/cards/HALLMARK_PEROXISOME	103	0.257403	1.02898	0.391517	0.540464	1	4055	tags=28%, list=24%, signal=37%
HALLMARK_DNA_REPAIR	https://www.gsea-msigdb.org/gsea/msigdb/human/geneset/HALLMARK_DNA_REPAIR	145	0.231277	0.969482	0.498423	0.687468	1	4267	tags=24%, list=25%, signal=32%
HALLMARK_BILE_ACID_METABOLISM	https://www.gsea-msigdb.org/gsea/msigdb/human/geneset/HALLMARK_BILE_ACID_METABOLISM	112	0.237047	0.968825	0.532508	0.659602	1	2499	tags=17%, list=15%, signal=20%
HALLMARK_HEME_METABOLISM	https://www.gsea-msigdb.org/gsea/msigdb/human/geneset/HALLMARK_HEME_METABOLISM	194	0.209791	0.914633	0.699545	0.792153	1	3059	tags=19%, list=18%, signal=22%
HALLMARK_UNFOLDED_PROTEIN_RESPONSE	https://www.gsea-msigdb.org/gsea/msigdb/cards/HALLMARK_UNFOLDED_PROTEIN_RESPONSE	112	0.223462	0.904769	0.675119	0.788106	1	4584	tags=33%, list=27%, signal=45%
HALLMARK_CHOLESTEROL_HOMEOSTASIS	https://www.gsea-msigdb.org/gsea/msigdb/cards/HALLMARK_CHOLESTEROL_HOMEOSTASIS	72	0.235756	0.896395	0.665568	0.782326	1	2260	tags=21%, list=13%, signal=24%
HALLMARK_MTORC1_SIGNALING	https://www.gsea-msigdb.org/gsea/msigdb/cards/HALLMARK_MTORC1_SIGNALING	198	0.203275	0.892397	0.768405	0.764673	1	2836	tags=20%, list=16%, signal=23%
HALLMARK_P53_PATHWAY	https://www.gsea-msigdb.org/gsea/msigdb/human/geneset/HALLMARK_P53_PATHWAY	198	0.198867	0.879141	0.777108	0.770285	1	2479	tags=15%, list=14%, signal=18%
HALLMARK_PI3K_AKT_MTOR_SIGNALING	https://www.gsea-msigdb.org/gsea/msigdb/human/geneset/HALLMARK_PI3K_AKT_MTOR_SIGNALING	103	0.202454	0.821045	0.84375	0.862521	1	5519	tags=40%, list=32%, signal=58%

## Sheet: Table S10
Enrichr analysis: miRNA from miRTaRBase 2017 that associated with genes that positively correlated with ATL2-2; METABRIC Estrogen receptor positive - luminal B
Term	Overlap	P-value	Adjusted P-value	Old P-value	Old Adjusted P-value	Odds Ratio	Combined Score	Genes
hsa-miR-30b-5p	25/416	4.72538e-10	1.16386e-06	0	0	5.06792	108.823	STAU1;UBE2D3;DCUN1D1;TWF1;WDR43;BTBD1;MIER3;KIF5B;PGGT1B;PGM3;FBXO3;ZNF567;KLF10;SMAD1;AKIRIN1;RRM2;FEM1B;PAWR;FAM91A1;PLSCR1;SIKE1;ADAM9;MATR3;AVL9;ASB3
hsa-miR-30d-5p	23/368	1.13901e-09	1.40269e-06	0	0	5.25366	108.189	KLF10;SMAD1;AKIRIN1;RRM2;STAU1;FEM1B;UBE2D3;DCUN1D1;PAWR;TWF1;FAM91A1;SENP2;PLSCR1;SIKE1;BTBD1;MIER3;KIF5B;PGGT1B;PGM3;ADAM9;AVL9;ASB3;MCL1
hsa-miR-30c-5p	27/520	2.28066e-09	1.51527e-06	0	0	4.35373	86.634	STAU1;UBE2D3;DCUN1D1;TWF1;BTBD1;MIER3;KIF5B;PGGT1B;PGM3;MCL1;KLF10;SMAD1;AKIRIN1;RRM2;FEM1B;IDH1;PAWR;FAM91A1;DDB1;PLSCR1;SIKE1;HNRNPK;ADAM9;RNPS1;MATR3;AVL9;ASB3
hsa-miR-3653-3p	14/130	2.46086e-09	1.51527e-06	0	0	9.28364	184.027	AKIRIN1;C17ORF80;FAM91A1;HS6ST1;U2SURP;ACTG1;REST;MIER3;FIGNL1;GNAQ;PPP1R8;AIDA;CCT7;EIF4G2
hsa-miR-30e-5p	20/347	5.519e-08	2.48398e-05	0	0	4.76622	79.6554	KLF10;AKIRIN1;RRM2;STAU1;UBE2D3;DCUN1D1;PAWR;TWF1;FAM91A1;CCT6A;PLSCR1;SIKE1;BTBD1;MIER3;KIF5B;PGGT1B;PGM3;ADAM9;AVL9;ASB3
hsa-miR-155-5p	34/903	6.05112e-08	2.48398e-05	0	0	3.14036	52.1941	MRS2;NCKAP1;RAB5C;MRPS34;UBE2D3;TMTC3;GMPS;TWF1;PSEN1;MAT2B;PHF6;STRN3;BTBD1;UBTD2;UBQLN1;SLC25A40;FAM3C;MEST;SMAD1;MORC3;RRM2;C17ORF80;ADAM10;UBE2G1;SCAMP1;MAPK14;FAM91A1;LSM3;FUBP3;UBA3;TCEA1;DSG2;MATR3;EIF4G2
mmu-miR-297a-5p	19/341	2.02504e-07	7.12524e-05	0	0	4.58101	70.6048	NCOA2;TMEM87B;DHX9;ADAM10;CCNC;GABPB1;EEA1;SIKE1;SON;CASP8;DLG3;SLC39A9;GNAQ;B3GNT2;NUP35;STAMBP;SOS1;MAP4K3;AGFG1
hsa-miR-590-3p	20/390	3.62821e-07	0.000100289	0	0	4.20297	62.3274	TRUB1;IPPK;NCKAP1;TSC22D1;PAWR;PLEKHA3;MAPK14;PEX13;MFSD14A;HNRNPK;LMBRD2;MIER3;RSRC1;GNAQ;ACOT2;B3GNT2;RNPS1;SEC23B;C16ORF87;MAP2K6
hsa-let-7b-5p	39/1214	3.81862e-07	0.000100289	0	0	2.67783	39.5736	NOMO3;PRIM2;INTS14;CTBP2;DHX9;GFM2;UBE2D3;AMD1;TMTC3;MAT2B;GABPB1;ACTG1;POLR2D;PGM3;ARIH1;SF3B1;SEC23B;GTF2I;SLC25A24;RRM2;CSNK2A1;TUBB;ELMOD2;MBD2;TIMM23;PLEKHA3;NUP153;SCAMP1;OCLN;SIKE1;RALGAPB;SON;UBA3;ATG4B;NUP35;DSG2;AIDA;EIF4G2;ANAPC1
hsa-miR-23b-3p	18/322	4.07183e-07	0.000100289	0	0	4.5828	67.4313	KLF10;TSNAX;TGIF1;TPM3;DDX47;FAM91A1;ILF2;PDIA6;PRDX3;DYNC2LI1;PPM1A;HNRNPK;PRPF6;G3BP2;ALDOA;CCT7;SOS1;GTF2I
hsa-miR-15a-5p	28/716	4.58967e-07	0.000102767	0	0	3.21579	46.9322	IPPK;ATF2;NCKAP1;PLEKHB2;PRDX3;YWHAQ;SLC39A9;KIF5B;LAMP2;FBXO3;ARIH1;GABPA;MCL1;TPM3;TUBB;C17ORF80;PEX13;PDIA6;U2SURP;RNF168;PPM1A;RALGAPB;PSMC4;B3GNT2;RNPS1;UBE2V1;AVL9;HNRNPA1L2
hsa-miR-30a-5p	28/733	7.31633e-07	0.000150168	0	0	3.13545	44.2975	NCKAP1;STAU1;UBE2D3;DCUN1D1;TWF1;FXR1;LSM12;BTBD1;MIER3;KIF5B;PGGT1B;PGM3;KLF10;SMAD1;AKIRIN1;RRM2;ELMOD2;IDH1;PAWR;FAM91A1;PLSCR1;SIKE1;SON;ADAM9;DSG2;AVL9;ASB3;HNRNPA1L2
hsa-miR-16-5p	45/1555	8.13312e-07	0.000154091	0	0	2.42415	33.9918	IPPK;GTF3C2;NCKAP1;TMEM41A;STAU1;PLEKHB2;HM13;TMTC3;SLC3A2;RPL6;WDR43;ACTG1;HSPD1;YWHAQ;SLC39A9;KIF5B;LAMP2;G3BP2;FBXO3;ARIH1;GABPA;PRELID3B;MCL1;SMAD1;ATP6V0E1;TPM3;TUBB;C17ORF80;PEX13;PDIA6;U2SURP;RNF168;PPM1A;RALGAPB;SON;PSMC1;NDUFAF4;CAPRIN1;B3GNT2;RNPS1;SNRPA1;UBE2V1;STT3B;AVL9;HNRNPA1L2
hsa-miR-539-5p	14/209	9.76468e-07	0.000171789	0	0	5.50033	76.1209	NCOA2;ARFGEF2;WDR1;UBE2D3;C17ORF80;UBE2G1;DCK;ACTG1;MFSD14B;REST;PSMC1;UBQLN1;RNPS1;SF3B1
hsa-miR-15b-5p	28/759	1.44852e-06	0.000237846	0	0	3.01979	40.601	IPPK;NCKAP1;PLEKHB2;PRDX3;YWHAQ;SLC39A9;KIF5B;LAMP2;ARIH1;RAE1;GABPA;ATP6V0E1;TPM3;TUBB;PEX13;PDIA6;U2SURP;RNF168;PPM1A;HNRNPK;RALGAPB;B3GNT2;RNPS1;DSG2;UBE2V1;STT3B;AVL9;HNRNPA1L2
hsa-miR-5680	13/189	1.78114e-06	0.000274185	0	0	5.6422	74.6929	WDR1;ELMOD2;AMD1;DYRK1A;GMPS;TWF1;NUP153;PRLR;ERI2;TCEA1;STAMBP;ACP1;EIF4G2
hsa-miR-548n	15/260	2.60237e-06	0.000377038	0	0	4.69693	60.3982	EGLN1;ITGB1;NUS1;TWF1;PAWR;RNF4;DCK;DDB1;LSM12;BCLAF1;REST;RALGAPB;SON;YWHAQ;PGK1
hsa-miR-20a-5p	34/1071	2.99878e-06	0.000410333	0	0	2.60816	33.1688	MRS2;ITGB1;ISY1;SGMS1;WDR1;TWF1;PHF6;EEA1;C3ORF38;TMEM67;MFN1;PGK1;EIF4H;FBXO3;MCL1;KLF10;ARFGEF2;SMIM13;RFC3;ATP6V0E1;RRM2;FEM1B;TUBB;WDR53;GTF2H3;LSM3;U2SURP;SIKE1;REST;SON;MORF4L2;TCEA1;NUP35;EIF4G2
hsa-miR-3121-3p	11/142	3.57647e-06	0.000463623	0	0	6.37908	80.0009	SMIM13;PPM1A;PLSCR1;WDR1;FEM1B;KIF5B;ELMOD2;UBE2V1;AIDA;GTF2I;AGFG1
hsa-miR-548e-5p	13/204	4.15027e-06	0.000511106	0	0	5.19511	64.3795	NCKAP1;NFYA;FAM91A1;MAPK14;PRLR;U2SURP;MFSD14A;SON;POLR2D;PGK1;POT1;ARIH1;UBE2V1
hsa-miR-497-5p	20/460	4.59139e-06	0.000538505	0	0	3.52154	43.2844	IPPK;NCKAP1;PLEKHB2;TPM3;PDIA6;RNF168;PPM1A;RALGAPB;YWHAQ;SLC39A9;KIF5B;LAMP2;B3GNT2;TCEA1;RNPS1;UBE2V1;ARIH1;AVL9;HNRNPA1L2;GABPA
hsa-miR-424-5p	20/471	6.51899e-06	0.000702966	0	0	3.43369	41.001	IPPK;NCKAP1;PLEKHB2;TPM3;PDIA6;RNF168;PPM1A;RALGAPB;YWHAQ;SLC39A9;KIF5B;LAMP2;B3GNT2;RNPS1;UBE2V1;ARIH1;AVL9;HNRNPA1L2;GABPA;EIF4G2
hsa-miR-6838-5p	19/431	6.56444e-06	0.000702966	0	0	3.5637	42.5286	IPPK;NCKAP1;PLEKHB2;TPM3;PDIA6;RNF168;PPM1A;RALGAPB;YWHAQ;SLC39A9;KIF5B;LAMP2;B3GNT2;RNPS1;UBE2V1;ARIH1;AVL9;HNRNPA1L2;GABPA
hsa-miR-548at-5p	10/124	6.96179e-06	0.000714453	0	0	6.64397	78.8977	PRDX3;ITGB1;EGLN1;SMIM13;SON;LMBRD2;YWHAQ;HDLBP;PGK1;TWF1
hsa-miR-149-5p	18/396	7.60919e-06	0.000749657	0	0	3.6716	43.274	NOMO3;RAB5C;RRM2;DHX9;HM13;ILF2;ACTG1;CCT6A;FXR1;DDB1;NGRN;PRPF6;TMEM237;EIF4H;RNPS1;MATR3;CENPO;HNRNPA1L2
hsa-miR-548c-3p	21/521	8.46856e-06	0.000802233	0	0	3.25686	38.0374	TGIF1;NCKAP1;PARG;SET;ELMOD2;ZBTB26;TMTC3;UBE2G1;SLC3A2;FAM91A1;CCT6A;FXR1;NEDD1;REST;SON;CAPRIN1;LAMP2;SPRTN;PGK1;UBXN7;ANAPC1
hsa-miR-186-5p	26/749	1.03393e-05	0.000943171	0	0	2.81297	32.2917	ITGB1;AMD1;GCC2;MIER3;ERI2;KIF5B;POLR2D;PGK1;MCL1;TGIF1;SMAD1;RRM2;CSNK2A1;FEM1B;TUBB;PGAM1;CCT6A;DDB1;SON;DLG3;XRN2;SPRTN;PKP2;MATR3;AVL9;EIF4G2
hsa-miR-342-3p	15/300	1.45947e-05	0.00128382	0	0	4.02942	44.867	ATP6V0E1;RRM2;CTBP2;HIPK3;STRN3;ACTG1;NGRN;RALGAPB;RBBP4;YWHAQ;YME1L1;UBXN7;FAM3C;ASB3;GART
mmu-miR-15a-5p	20/499	1.51332e-05	0.00128527	0	0	3.22828	35.8294	TSC22D1;TUBB;DYRK1A;ADAM10;HPS3;RNF4;SENP2;HS6ST1;RNF168;RALGAPB;MAEA;SLC39A9;GNAQ;B3GNT2;ALDOA;AVL9;SOS1;STAM2;GABPA;KDM6A
hsa-miR-3646	12/200	1.7867e-05	0.00139125	0	0	4.8538	53.0644	FXR1;TSNAX;EGLN1;LMBR1;SET;ERI2;G3BP2;PGK1;PAWR;ADAM9;PDIA6;GTF2I
hsa-miR-548t-5p	14/269	1.80755e-05	0.00139125	0	0	4.19322	45.7939	EGLN1;ITGB1;NUS1;RAB5C;SGMS1;DCK;C3ORF38;LSM12;OCLN;BCLAF1;SON;MORF4L2;PGK1;AVL9
hsa-miR-548az-5p	14/269	1.80755e-05	0.00139125	0	0	4.19322	45.7939	EGLN1;ITGB1;NUS1;RAB5C;SGMS1;DCK;C3ORF38;LSM12;OCLN;BCLAF1;SON;MORF4L2;PGK1;AVL9
hsa-miR-18a-3p	16/350	2.28936e-05	0.0017058	0	0	3.67272	39.2417	SET;HM13;TUBB;GMPS;WDR53;ATP2C1;SRP9;PLSCR1;RBBP4;TMEM203;PGK1;UBXN7;ALDOA;GART;SEC23B;AGFG1
hsa-miR-17-5p	34/1181	2.35474e-05	0.0017058	0	0	2.34416	24.9805	TRUB1;ITGB1;ISY1;SGMS1;WDR1;AMD1;TWF1;PHF6;EEA1;C3ORF38;TMEM67;MFN1;EIF4H;ARIH1;MCL1;KLF10;SMIM13;ATP6V0E1;RRM2;FEM1B;PGAM1;WDR53;MAPK14;GTF2H3;LSM3;U2SURP;CCT6A;SIKE1;REST;SON;MORF4L2;ACOT2;NUP35;EIF4G2
hsa-miR-32-5p	21/565	2.83021e-05	0.00199166	0	0	2.98659	31.2773	MRS2;NUS1;ARFGEF2;MORC3;TMEM41A;MBD2;AMD1;PAWR;TWF1;ADAM10;RNF4;FAM91A1;CCT6A;FXR1;MIER3;KIF5B;GNAQ;LAMP2;MFN1;G3BP2;MCL1
hsa-miR-106b-5p	32/1091	2.91305e-05	0.00199301	0	0	2.38066	24.8629	ITGB1;ISY1;SGMS1;WDR1;DCUN1D1;TWF1;PHF6;EEA1;C3ORF38;CASP8;TMEM67;MFN1;EIF4H;TMPO;MCL1;KLF10;SMIM13;ATP6V0E1;RRM2;ANAPC7;FEM1B;WDR53;GTF2H3;FAM91A1;LSM3;U2SURP;SIKE1;REST;SON;NUP35;RNPS1;EIF4G2
hsa-miR-93-5p	34/1220	4.52731e-05	0.00301372	0	0	2.26232	22.6295	ITGB1;ISY1;SET;SGMS1;WDR1;TWF1;UBR1;PHF6;EEA1;C3ORF38;YWHAQ;TMEM67;FIGNL1;MFN1;EIF4H;FAM3C;MCL1;KLF10;SMIM13;RFC3;ATP6V0E1;RRM2;FEM1B;PGAM1;WDR53;NUP153;GTF2H3;LSM3;U2SURP;SIKE1;REST;SON;NUP35;EIF4G2
hsa-miR-195-5p	22/639	5.73214e-05	0.00371533	0	0	2.75926	26.9492	IPPK;NCKAP1;PLEKHB2;TPM3;TUBB;PEX13;PDIA6;U2SURP;RNF168;PPM1A;RALGAPB;YWHAQ;SLC39A9;KIF5B;LAMP2;B3GNT2;RNPS1;UBE2V1;ARIH1;AVL9;HNRNPA1L2;GABPA
hsa-miR-615-3p	27/891	7.40253e-05	0.00467498	0	0	2.43634	23.1723	NOMO3;PLEKHB2;PDXDC1;WDR1;HDLBP;HS6ST1;LSM12;BCLAF1;MIER3;CCT7;SF3B1;TMPO;MCL1;CSNK2A1;TPM3;TUBB;PGAM1;MAD2L1BP;ILF2;HNRNPK;RALGAPB;DLG3;RNPS1;MATR3;ALDOA;ASB3;GART
hsa-miR-142-3p	16/388	7.82761e-05	0.00481985	0	0	3.29109	31.1181	SLC30A6;NCKAP1;SGMS1;RPE;TMTC3;TWF1;SCAMP1;U2SURP;STRN3;BCLAF1;SLC39A9;MORF4L2;KIF5B;GNAQ;FBXO3;ARL6IP6
hsa-miR-92b-3p	23/709	9.52544e-05	0.00572223	0	0	2.59567	24.0332	MRS2;ARFGEF2;MORC3;TMEM41A;PGAM1;MBD2;AMD1;PAWR;TWF1;ADAM10;RNF4;FAM91A1;FXR1;RNF168;KIF5B;CAPRIN1;GNAQ;LAMP2;MFN1;G3BP2;FAM3C;ALDOA;MCL1
hsa-miR-20b-5p	27/917	0.000119123	0.00698569	0	0	2.3619	21.3407	ITGB1;ISY1;SGMS1;WDR1;TWF1;PHF6;EEA1;C3ORF38;TMEM67;MFN1;EIF4H;MCL1;KLF10;SMIM13;ATP6V0E1;RRM2;FEM1B;WDR53;GTF2H3;HIPK3;LSM3;U2SURP;SIKE1;REST;SON;NUP35;EIF4G2
hsa-miR-4422	8/112	0.000137326	0.00786591	0	0	5.78456	51.4429	MFSD14A;REST;SON;POLR2D;EIF4H;GCC2;GABPA;SRP9
hsa-miR-92a-3p	36/1404	0.000144524	0.00809004	0	0	2.07398	18.3383	MRS2;GTF3C2;GPR89A;TMEM41A;WDR1;AMD1;TWF1;SLC3A2;UBR1;RNF4;FXR1;YWHAQ;KIF5B;LAMP2;MFN1;G3BP2;RIOK1;CCT7;GABPA;MCL1;ARFGEF2;MORC3;TPM3;TUBB;MBD2;DYRK1A;PAWR;ADAM10;FAM91A1;ILF2;HIPK3;CAPRIN1;GNAQ;RNPS1;AIDA;EIF4G2
hsa-miR-224-3p	8/114	0.000155321	0.00850122	0	0	5.67484	49.7684	PLEKHF2;EGLN1;SLC39A9;RSRC1;FEM1B;MORF4L2;CAPRIN1;DYRK1A
hsa-miR-522-3p	8/115	0.000165021	0.00883579	0	0	5.62151	48.9602	PLEKHF2;EGLN1;SLC39A9;RSRC1;FEM1B;MORF4L2;CAPRIN1;DYRK1A
hsa-miR-3658	9/150	0.000200763	0.0101379	0	0	4.80933	40.9437	AKIRIN1;MIER3;FIGNL1;GNAQ;C17ORF80;FAM91A1;HS6ST1;EIF4G2;ACTG1
hsa-miR-548ay-3p	1990-07-01	0.000212614	0.0101379	0	0	6.32466	53.4815	NCKAP1;SON;MIER3;PGM3;PLEKHA3;STRN3;PRELID3B
hsa-miR-548at-3p	1990-07-01	0.000212614	0.0101379	0	0	6.32466	53.4815	NCKAP1;SON;MIER3;PGM3;PLEKHA3;STRN3;PRELID3B
hsa-miR-5682	1964-06-01	0.000218389	0.0101379	0	0	7.73817	65.2268	EEA1;CASP8;FEM1B;SPRTN;ALDOA;MCL1
hsa-miR-505-3p	11/222	0.000219554	0.0101379	0	0	3.9443	33.2265	PSMD10;REST;DHX9;RSRC1;TUBB;MORF4L2;UBE2D3;POLR2D;HDLBP;STAMBP;CCT7
hsa-miR-548f-5p	12/261	0.00022938	0.0101379	0	0	3.65327	30.6149	FXR1;PLEKHF2;TMEM41A;ATP6V0E1;NFYA;ELMOD2;UBE2D3;LAMP2;G3BP2;UBXN7;ARIH1;AGFG1
hsa-miR-767-5p	10/187	0.000229861	0.0101379	0	0	4.26543	35.7359	SMIM13;CASP8;MORF4L2;GNAQ;TMTC3;PGM3;GPATCH2L;MCL1;STRN3;C16ORF87
hsa-miR-548x-5p	12/262	0.000237567	0.0101379	0	0	3.63847	30.3633	FXR1;PLEKHF2;TMEM41A;ATP6V0E1;NFYA;ELMOD2;UBE2D3;LAMP2;G3BP2;UBXN7;ARIH1;AGFG1
hsa-miR-548aj-5p	12/262	0.000237567	0.0101379	0	0	3.63847	30.3633	FXR1;PLEKHF2;TMEM41A;ATP6V0E1;NFYA;ELMOD2;UBE2D3;LAMP2;G3BP2;UBXN7;ARIH1;AGFG1
hsa-miR-18a-5p	12/262	0.000237567	0.0101379	0	0	3.63847	30.3633	CCT6A;RAB5C;SON;ACTL6A;UBTD2;TWF1;UBE2G1;MATR3;FAM3C;RNF4;GABPA;AGFG1
hsa-miR-548g-5p	12/262	0.000237567	0.0101379	0	0	3.63847	30.3633	FXR1;PLEKHF2;TMEM41A;ATP6V0E1;NFYA;ELMOD2;UBE2D3;LAMP2;G3BP2;UBXN7;ARIH1;AGFG1
hsa-miR-519d-3p	26/906	0.000238732	0.0101379	0	0	2.29202	19.1159	ITGB1;ISY1;SGMS1;WDR1;TWF1;PHF6;EEA1;C3ORF38;TMEM67;MFN1;EIF4H;MCL1;KLF10;SMIM13;ATP6V0E1;RRM2;FEM1B;WDR53;GTF2H3;LSM3;U2SURP;SIKE1;REST;SON;NUP35;EIF4G2
hsa-miR-20a-3p	1992-07-01	0.000243691	0.0101731	0	0	6.17521	51.3754	FXR1;MFSD14A;NCKAP1;ATP6V0E1;YWHAQ;TMEM67;PGM3
hsa-miR-125b-5p	16/430	0.000253174	0.0103928	0	0	2.95079	24.4368	IPPK;SET;CSNK2A1;C17ORF80;TIMM23;PIK3CB;MAPK14;FAM91A1;STRN3;HSPD1;FXR1;REST;HNRNPK;SPRTN;MATR3;MCL1
hsa-miR-4275	1966-06-01	0.000258797	0.0104494	0	0	7.47947	61.7764	PGM3;RABL3;CCT7;EIF4G2;STRN3;SLC25A24
mmu-miR-425-5p	15/391	0.000285081	0.0113251	0	0	3.03993	24.8141	KLF10;ATF2;MAT2B;SCAMP1;SON;LMBRD2;MIER3;CAPN7;KIF5B;CAPRIN1;AVL9;SOS1;STAM2;ANAPC1;MCL1
mmu-miR-19b-3p	13/310	0.000310852	0.0121528	0	0	3.32284	26.8359	TGIF1;ATF2;PARG;NFYA;YWHAB;FEM1B;HIPK3;CAPRIN1;TBC1D23;AVL9;EIF4G2;AGFG1;GTF2I
mmu-miR-340-5p	19/576	0.000315882	0.0121565	0	0	2.6162	21.087	TGIF1;YWHAB;IDH1;RBM18;MBD2;ADAM10;PLEKHA3;MEMO1;FAM91A1;PRDX3;SON;G3BP2;FBXO3;SOS1;GABPA;EIF4G2;ARL6IP6;MCL1;SLC25A24
hsa-miR-585-5p	1945-05-01	0.000333766	0.0126472	0	0	9.32339	74.6344	EEA1;FEM1B;MAPK14;ALDOA;EIF4G2
hsa-miR-374b-5p	11/234	0.000344715	0.0128641	0	0	3.72976	29.7366	PRDX3;TRUB1;ATF2;NUS1;SON;STAU1;MIER3;NUP153;SNRPA1;SEC23B;SLC25A24
mmu-miR-194-5p	2026-04-01	0.000378898	0.0139287	0	0	13.5225	106.533	SET;PGM3;GABPB1;ARL6IP6
hsa-miR-16-1-3p	7/100	0.000406567	0.0143921	0	0	5.64171	44.0492	SMIM13;AKIRIN1;STAU1;TMEM67;AMD1;DCUN1D1;MATR3
hsa-miR-545-3p	9/165	0.000406835	0.0143921	0	0	4.34357	33.9107	FXR1;PPM1A;PLEKHB2;YWHAQ;SLC39A9;TPM3;TUBB;SPRTN;ARIH1
hsa-miR-3607-5p	1972-06-01	0.00041613	0.0143921	0	0	6.79744	52.9148	UBE2D3;PAWR;B3GNT2;DSG2;UBE2V1;HSPD1
hsa-miR-4419b	17/496	0.000422636	0.0143921	0	0	2.71137	21.0646	PRIM2;SLC30A6;PLEKHB2;NFYA;TPM3;AMD1;MEMO1;PEX13;CKS1B;THAP1;SIKE1;CASP8;PSMC4;RSRC1;SLC39A9;ACOT2;ALDOA
hsa-miR-192-5p	27/993	0.000422697	0.0143921	0	0	2.1673	16.8375	PLEKHF2;ITGB1;UBA5;TMTC3;GABPB1;PHF6;RPAP3;EEA1;RSRC1;SLC39A9;KIF5B;PGM3;FBXO3;SLC25A40;SEC23B;TMPO;KLF10;NFYA;NCBP2;DYRK1A;CCZ1;PAWR;ALG10;NEDD1;PPM1A;MFSD14B;YME1L1
hsa-miR-3929	17/497	0.000432407	0.0143921	0	0	2.70558	20.9578	PRIM2;SLC30A6;PLEKHB2;NFYA;TPM3;AMD1;MEMO1;PEX13;CKS1B;THAP1;SIKE1;CASP8;PSMC4;RSRC1;SLC39A9;ACOT2;ALDOA
hsa-miR-4478	17/497	0.000432407	0.0143921	0	0	2.70558	20.9578	PRIM2;SLC30A6;PLEKHB2;NFYA;TPM3;AMD1;MEMO1;PEX13;CKS1B;THAP1;SIKE1;CASP8;PSMC4;RSRC1;SLC39A9;ACOT2;ALDOA
hsa-miR-103a-3p	16/452	0.000438704	0.014407	0	0	2.79871	21.6387	IPPK;PLEKHF2;NUS1;CSNK2A1;PAWR;TWF1;ADAM10;RNF168;SON;KIF5B;LAMP2;G3BP2;B3GNT2;ARIH1;AVL9;AGFG1
hsa-miR-144-3p	10/210	0.00057592	0.0185482	0	0	3.77046	28.1259	DYNC2LI1;NUS1;MORC3;AKIRIN1;PGAM1;TMTC3;DCUN1D1;PLEKHA3;STAMBP;MCL1
hsa-miR-23a-3p	11/249	0.000580915	0.0185482	0	0	3.492	26.0186	DYNC2LI1;TSNAX;KLF10;TPM3;MRPS34;GMPS;ADAM9;NUP153;STT3B;FAM91A1;PDIA6
hsa-miR-877-3p	19/606	0.000587399	0.0185482	0	0	2.47861	18.4404	PSMD10;NOMO3;NUS1;SET;PLEKHB2;WDR1;YWHAB;UBE2D3;HDLBP;WDR43;SRP9;ACTG1;BCLAF1;HNRNPK;PSMC4;CAPN7;UBXN7;ALDOA;CCT7
hsa-miR-5003-3p	8/139	0.000595929	0.0185794	0	0	4.586	34.0528	TGIF1;TMEM87B;FEM1B;UBE2D3;ARIH1;THAP1;STRN3;HSPD1
hsa-miR-4477a	8/140	0.000624831	0.019237	0	0	4.55103	33.5776	AKIRIN1;SGMS1;MIER3;FEM1B;XRN2;NUP35;MEMO1;PHF6
hsa-miR-6505-5p	1978-06-01	0.000639752	0.0194532	0	0	6.22909	45.8114	PLEKHF2;SET;YWHAQ;RBM18;STAMBP;AVL9
hsa-miR-218-5p	23/815	0.000689112	0.0206986	0	0	2.23576	16.2765	KLF10;ITGB1;ATP6V0E1;STAU1;WDR1;TPM3;YWHAB;RBM18;UBE2D3;PAWR;RNF4;PRLR;PDIA6;SIKE1;RIT1;SLC39A9;RNPS1;CENPO;UBE2V1;AVL9;HNRNPA1L2;STAM2;KDM6A
hsa-miR-676-5p	7/110	0.000721501	0.0214103	0	0	5.09138	36.8319	CCT6A;REST;PARG;UBE2D3;PGM3;ALDOA;LIN52
hsa-miR-27a-3p	15/429	0.000747005	0.0219033	0	0	2.75548	19.8379	NUS1;AKIRIN1;STAU1;SGMS1;NCBP2;FEM1B;TMTC3;UBE2G1;MAPK14;DYNC2LI1;MIER3;ZNF627;LAMP2;ALDOA;SOS1
mmu-miR-1192	9/181	0.000793064	0.0229802	0	0	3.93629	28.1036	RNF168;SET;SENP5;FUBP3;KNOP1;PGM3;UBTD2;SCAMP1;PEX13
hsa-miR-33a-3p	8/146	0.00082292	0.023568	0	0	4.35182	30.9095	NUS1;SMIM13;PLSCR1;RRM2;SLC39A9;POT1;MATR3;PDIA6
hsa-miR-29b-3p	11/261	0.000855796	0.0242279	0	0	3.32234	23.4673	ITGB1;NUS1;REST;CASP8;TMEM237;FEM1B;MORF4L2;TMTC3;SPRTN;MAP2K6;MCL1
mmu-miR-495-3p	9/185	0.000925909	0.0259149	0	0	3.84604	26.8636	RNF168;SET;SENP5;FUBP3;KNOP1;PGM3;UBTD2;SCAMP1;PEX13
hsa-let-7d-5p	14/394	0.000954854	0.0260724	0	0	2.79581	19.4419	PRIM2;SLC30A6;RRM2;MBD2;AMD1;TMTC3;PLEKHA3;RALGAPB;SENP5;POLR2D;FBXO3;ARIH1;EIF4G2;LIN52
hsa-miR-8058	1933-04-01	0.000963291	0.0260724	0	0	10.2548	71.2211	MORF4L2;SCAMP1;ALDOA;HIPK3
hsa-miR-5009-5p	1933-04-01	0.000963291	0.0260724	0	0	10.2548	71.2211	MORF4L2;SCAMP1;ALDOA;HIPK3
hsa-miR-1468-3p	11/266	0.000998476	0.0263991	0	0	3.25636	22.4991	FXR1;PLEKHF2;TMEM41A;ATP6V0E1;NFYA;CAPN7;ELMOD2;UBE2D3;G3BP2;UBXN7;AGFG1
hsa-miR-34a-5p	21/735	0.00100688	0.0263991	0	0	2.25534	15.5639	DTYMK;RRM2;NCBP2;ECD;HDLBP;U2SURP;ACTG1;FXR1;BCLAF1;SON;CASP8;KIF5B;CAPRIN1;PKP2;G3BP2;ATG4B;SNRPA1;FAM3C;STAM2;RAE1;MCL1
hsa-miR-4802-3p	1985-06-01	0.00100752	0.0263991	0	0	5.67512	39.1598	RNF168;MFSD14B;OCLN;REST;PGGT1B;MATR3
hsa-miR-1226-3p	10/227	0.00104597	0.0271182	0	0	3.47206	23.8281	PRPF6;WDR1;SLC39A9;IDH1;UBE2G1;FAM3C;GABPB1;SCAMP1;AVL9;ACTG1
hsa-miR-4719	8/153	0.0011147	0.028599	0	0	4.14026	28.1503	PPM1A;LMBR1;REST;YWHAQ;TUBB;MAPK14;PRLR;HNRNPA1L2
hsa-miR-126-5p	7/119	0.00114697	0.0291235	0	0	4.6801	31.6873	SON;BTBD1;MBD2;PGM3;ADAM9;DSG2;SCAMP1
hsa-miR-196b-3p	2016-03-01	0.00118348	0.029744	0	0	17.1064	115.285	SOS1;PDIA6;HIPK3
hsa-miR-4694-3p	7/120	0.00120431	0.0299617	0	0	4.63845	31.179	FXR1;PLEKHF2;EGLN1;AKIRIN1;FEM1B;CAPRIN1;SCAMP1
hsa-miR-1260b	11/273	0.00123078	0.030314	0	0	3.16822	21.2274	C3ORF38;HNRNPK;SET;CSNK2A1;CAPN7;RPE;SLC3A2;ALDOA;CCT7;SF3B1;ARL6IP6
hsa-miR-4452	7/121	0.00126387	0.030821	0	0	4.59753	30.682	ITGB1;MFSD14A;RAB5C;TMEM67;PEX13;ANAPC1;MCL1
hsa-miR-548ah-5p	12/319	0.00134877	0.0324401	0	0	2.95426	19.5234	ITGB1;NUS1;SMIM13;OCLN;REST;RRM2;FEM1B;EIF4H;MEMO1;DCK;HIPK3;U2SURP
hsa-miR-7855-5p	1990-06-01	0.00135661	0.0324401	0	0	5.33596	35.2321	IPPK;SMIM13;PLSCR1;CASP8;MORF4L2;C16ORF87
hsa-miR-3609	12/320	0.00138493	0.0327989	0	0	2.94451	19.3811	ITGB1;NUS1;SMIM13;OCLN;REST;RRM2;FEM1B;EIF4H;MEMO1;DCK;HIPK3;U2SURP
hsa-miR-26a-5p	15/457	0.00140388	0.032931	0	0	2.57718	16.9283	NUS1;SMAD1;AKIRIN1;SET;RRM2;CTBP1;TMTC3;DYRK1A;HSPD1;PRDX3;DDB1;MFSD14A;RABL3;EIF4G2;MCL1
hsa-miR-1301-3p	9/198	0.00148749	0.0345632	0	0	3.57912	23.3025	MRS2;PLEKHF2;TMEM41A;SON;YWHAB;HDLBP;PAWR;ALDOA;TMPO
hsa-miR-4330	1992-06-01	0.0015195	0.0349769	0	0	5.21134	33.8183	DDB1;TPM3;UBE2D3;EIF4H;MATR3;UBE2V1
hsa-miR-758-5p	1963-05-01	0.00157797	0.0359864	0	0	6.42405	41.4455	MORC3;SON;TMEM67;STAMBP;UBE2V1
hsa-miR-562	7/126	0.00159713	0.0360892	0	0	4.40323	28.3548	REST;RALGAPB;RABL3;EIF4H;PSEN1;EIF4G2;THAP1
hsa-miR-21-5p	18/611	0.00163763	0.0364303	0	0	2.31441	14.8458	TSNAX;EGLN1;TGIF1;ATF2;MORC3;SET;HIPK3;LMBR1;REST;HNRNPK;CASP8;CAPRIN1;GNAQ;LAMP2;FBXO3;YME1L1;FAM3C;GTF2I
hsa-miR-19b-3p	20/713	0.00164414	0.0364303	0	0	2.20658	14.1453	KLF10;TGIF1;PLEKHF2;ATF2;NUS1;ATP6V0E1;CSNK2A1;WDR1;NCBP2;ELMOD2;UBE2D3;ARMC8;MAPK14;HIPK3;FXR1;SON;G3BP2;PGK1;ZNF567;SEC23B
hsa-miR-5197-3p	8/163	0.00166894	0.0364303	0	0	3.87117	24.7583	KLF10;DDB1;KIF5B;C17ORF80;GCC2;UBE2G1;AIDA;CCT7
hsa-miR-106a-5p	20/714	0.00167139	0.0364303	0	0	2.20328	14.088	KLF10;ITGB1;ISY1;SMIM13;ATP6V0E1;RRM2;SGMS1;FEM1B;WDR53;MAPK14;GTF2H3;HIPK3;LSM3;U2SURP;C3ORF38;REST;SON;MFN1;EIF4H;EIF4G2
hsa-let-7c-5p	16/516	0.00176119	0.0380509	0	0	2.43238	15.4256	PRIM2;INTS14;RRM2;CSNK2A1;DHX9;MBD2;AMD1;TMTC3;PLEKHA3;CCNC;ARMC8;POLR2D;AIDA;ARIH1;MAP4K3;EIF4G2
hsa-miR-8080	1965-05-01	0.00181446	0.038806	0	0	6.20928	39.1928	SLC39A9;EIF4H;SEC23B;CKS1B;MCL1
hsa-miR-4762-5p	7/129	0.00182765	0.038806	0	0	4.2943	27.0744	KLF10;PLSCR1;CSNK2A1;YWHAQ;POT1;MAPK14;HNRNPA1L2
hsa-miR-5692a	11/288	0.00187993	0.039575	0	0	2.99435	18.7941	EGLN1;TGIF1;OCLN;SON;PLEKHB2;FEM1B;DYRK1A;MAT2B;HS6ST1;DCK;C16ORF87
hsa-miR-202-3p	9/206	0.00195126	0.0407285	0	0	3.43237	21.4155	PRIM2;RRM2;MIER3;MBD2;POLR2D;TMTC3;PLEKHA3;AIDA;LIN52
hsa-miR-584-5p	1967-05-01	0.00207591	0.0429662	0	0	6.00837	37.1158	MORC3;SON;STAMBP;UBE2V1;PRLR
hsa-miR-4282	11/293	0.00214996	0.0441279	0	0	2.9405	18.0615	NEDD1;SET;RAB5C;SON;NFYA;TPM3;KIF5B;AMD1;PGGT1B;PAWR;ZNF567
hsa-miR-484	23/890	0.00217842	0.0441299	0	0	2.03426	12.4683	NOMO3;NUS1;ARFGEF2;SET;RRM2;ANAPC7;TUBB;PGAM1;HDLBP;TIMM23;ADAM10;GTF2H3;ILF2;PPM1A;LSM12;HNRNPK;CAPRIN1;G3BP2;UBQLN1;GART;EIF4G2;ANAPC1;GTF2I
hsa-miR-324-3p	12/338	0.00218589	0.0441299	0	0	2.77936	17.0256	CCT6A;SON;PLEKHB2;HM13;MCRS1;TUBB;AMD1;G3BP2;PGK1;WDR53;ALDOA;SEC23B
hsa-miR-668-5p	2020-03-01	0.00231539	0.0462223	0	0	13.0787	79.364	ISY1;ALDOA;PRLR
hsa-miR-3662	10/253	0.00233452	0.0462223	0	0	3.09643	18.7642	FXR1;IPPK;NCKAP1;LMBR1;AKIRIN1;SET;RSRC1;G3BP2;RNPS1;DCK
hsa-miR-520f-5p	1969-05-01	0.00236384	0.0462223	0	0	5.82002	35.1964	TGIF1;PLEKHB2;SLC39A9;KIF5B;FAM91A1
hsa-miR-1304-5p	7/135	0.00236553	0.0462223	0	0	4.09175	24.7418	PLEKHF2;PLSCR1;CSNK2A1;HS6ST1;PDIA6;MAP2K6;CKS1B
hsa-miR-4775	11/297	0.00238797	0.0462223	0	0	2.89878	17.5008	TRUB1;MFSD14A;NCKAP1;LMBRD2;SGMS1;TMEM67;GNAQ;ACOT2;MAPK14;SEC23B;MAP2K6
hsa-miR-29c-3p	10/254	0.00240213	0.0462223	0	0	3.08358	18.5983	ITGB1;REST;CASP8;TMEM237;FEM1B;MORF4L2;TMTC3;SPRTN;U2SURP;MCL1
hsa-miR-3617-5p	6/101	0.00244358	0.0462965	0	0	4.71547	28.3602	NUS1;PPM1A;MFSD14B;SIKE1;REST;KIF5B
hsa-miR-655-3p	6/101	0.00244358	0.0462965	0	0	4.71547	28.3602	KIF5B;ADAM10;PSEN1;ARIH1;PEX13;HIPK3
hsa-miR-7852-3p	1970-05-01	0.0025182	0.0469874	0	0	5.73019	34.2906	KIF5B;TMTC3;DCUN1D1;TWF1;SRP9
hsa-miR-1185-5p	1970-05-01	0.0025182	0.0469874	0	0	5.73019	34.2906	NCOA2;CSNK2A1;CAPN7;KDM6A;PRELID3B
hsa-miR-107	11/300	0.00258015	0.0477785	0	0	2.86824	17.0945	RNF168;PLEKHF2;NUS1;CSNK2A1;TUBB;G3BP2;PAWR;TWF1;B3GNT2;ARIH1;GPR89B
hsa-let-7a-5p	18/639	0.00265561	0.0477785	0	0	2.20682	13.0889	MRS2;PRIM2;RRM2;CSNK2A1;DHX9;MBD2;AMD1;TMTC3;PLEKHA3;PHF6;CASP8;BTBD1;POLR2D;AIDA;ARIH1;EIF4G2;ARL6IP6;GTF2I
hsa-miR-6835-3p	7/138	0.00267649	0.0477785	0	0	3.99744	23.6778	REST;NFYA;DCUN1D1;PGK1;POT1;GCC2;GABPA
hsa-miR-218-2-3p	1971-05-01	0.00267976	0.0477785	0	0	5.64308	33.4185	MORC3;SON;STAU1;STAMBP;UBE2V1
hsa-miR-101-3p	13/393	0.00268922	0.0477785	0	0	2.58597	15.3051	NCKAP1;MORC3;RRM2;UBE2D3;AMD1;TMTC3;PLEKHA3;PIK3CB;EEA1;ZNF567;STAMBP;EIF4G2;MCL1
hsa-miR-520f-3p	6/103	0.00269639	0.0477785	0	0	4.61777	27.318	KLF10;SON;FEM1B;TWF1;AVL9;RNF4
hsa-miR-641	6/103	0.00269639	0.0477785	0	0	4.61777	27.318	NUS1;PPM1A;MFSD14B;SIKE1;REST;KIF5B
hsa-miR-193b-3p	22/852	0.00273334	0.0480872	0	0	2.0283	11.9715	NCOA2;RAB5C;RRM2;PDXDC1;HM13;MCRS1;TUBB;PGAM1;TWF1;GCC2;SLC3A2;UBR1;ACTG1;PRDX3;DDB1;SENP5;YWHAQ;SPRTN;PGM3;ASB3;ANAPC1;MCL1
hsa-miR-5196-5p	11/304	0.00285564	0.0495313	0	0	2.8285	16.5707	TGIF1;MFSD14B;RAB5C;CTBP1;TPM3;ERI2;KIF5B;POLR2D;HDLBP;SENP2;ASB3
hsa-miR-4747-5p	11/304	0.00285564	0.0495313	0	0	2.8285	16.5707	TGIF1;MFSD14B;RAB5C;CTBP1;TPM3;ERI2;KIF5B;POLR2D;HDLBP;SENP2;ASB3
hsa-miR-554	2022-03-01	0.00306642	0.0524944	0	0	11.7008	67.7156	ALDOA;PRLR;PEX13
hsa-miR-548t-3p	8/180	0.00309056	0.0524944	0	0	3.48552	20.1442	NCKAP1;SON;MIER3;TMEM237;POLR2D;PLEKHA3;ARIH1;PRELID3B
hsa-miR-548ap-3p	8/180	0.00309056	0.0524944	0	0	3.48552	20.1442	NCKAP1;SON;MIER3;TMEM237;POLR2D;PLEKHA3;ARIH1;PRELID3B
hsa-miR-1270	6/106	0.00311173	0.0524944	0	0	4.47856	25.8528	REST;YWHAQ;YWHAB;TUBB;DYRK1A;UBE2G1
hsa-miR-215-5p	20/755	0.00317191	0.0531457	0	0	2.0759	11.9435	KLF10;PLEKHF2;ITGB1;UBA5;TMTC3;DYRK1A;CCZ1;PAWR;ALG10;PHF6;NEDD1;MFSD14B;RSRC1;SLC39A9;KIF5B;PGM3;YME1L1;SLC25A40;SEC23B;TMPO
hsa-miR-548aa	8/181	0.0031968	0.0532009	0	0	3.4652	19.9096	NCKAP1;SON;MIER3;TMEM237;POLR2D;PLEKHA3;ARIH1;PRELID3B
hsa-miR-543	6/107	0.00326024	0.0535332	0	0	4.43399	25.3888	AMD1;ADAM9;MATR3;FAM3C;CENPO;PDIA6
hsa-miR-620	6/107	0.00326024	0.0535332	0	0	4.43399	25.3888	REST;YWHAQ;YWHAB;TUBB;DYRK1A;UBE2G1
hsa-miR-548aw	10/266	0.00334307	0.0545296	0	0	2.93723	16.7447	FXR1;PLEKHF2;TMEM41A;ATP6V0E1;NFYA;ELMOD2;G3BP2;UBXN7;MAPK14;AGFG1
hsa-miR-125a-5p	10/268	0.00352505	0.0571197	0	0	2.91416	16.4588	IPPK;RIT1;REST;CSNK2A1;SPRTN;C17ORF80;PGM3;ADAM9;MAPK14;MCL1
hsa-miR-888-5p	1976-05-01	0.00360197	0.0575204	0	0	5.24434	29.5061	SLC39A9;UBE2D3;G3BP2;B3GNT2;RNPS1
hsa-miR-8077	1976-05-01	0.00360197	0.0575204	0	0	5.24434	29.5061	GPR89A;EIF4H;PIK3CB;GPR89B;HNRNPA1L2
mmu-miR-296-5p	2023-07-02	0.00361984	0.0575204	0	0	29.5521	166.122	ZNF567;PRLR
hsa-miR-485-5p	16/556	0.0036769	0.0576836	0	0	2.24752	12.5989	PRIM2;SLC30A6;PLEKHB2;CSNK2A1;TPM3;ACTG1;CKS1B;THAP1;SIKE1;CASP8;PSMC4;RSRC1;SLC39A9;ACOT2;NUP35;C16ORF87
hsa-miR-197-3p	13/408	0.00369497	0.0576836	0	0	2.48584	13.9226	KLF10;NUS1;MORC3;GMPS;GTF2H3;PEX13;HIPK3;ACTG1;CKS1B;HSPD1;MORN2;EIF4H;ALDOA
hsa-miR-1273g-3p	15/506	0.00370037	0.0576836	0	0	2.31409	12.9574	KLF10;TGIF1;ISY1;ATP6V0E1;PLEKHA3;GABPB1;MIER3;RSRC1;TMEM67;KIF5B;PGK1;PGM3;NUP35;ALDOA;AVL9
hsa-miR-4485-5p	8/186	0.0037713	0.0580545	0	0	3.367	18.789	NCKAP1;HM13;UBXN7;SCAMP1;ALDOA;SF3B1;CKS1B;STRN3
hsa-miR-6868-3p	8/186	0.0037713	0.0580545	0	0	3.367	18.789	CSNK2A1;CTBP2;RBBP4;CAPRIN1;NUP35;ACP1;PEX13;ANAPC1
mmu-miR-26a-5p	13/412	0.0040093	0.0608622	0	0	2.46041	13.5793	ITGB1;ATF2;NUS1;TMEM87B;GPR89A;FEM1B;KNOP1;CCNC;ATP2C1;PHF6;GNAQ;TBC1D23;SOS1
hsa-miR-4717-3p	1978-05-01	0.00402782	0.0608622	0	0	5.10015	28.1249	TGIF1;RNF168;YWHAQ;TPM3;HIPK3
hsa-miR-151a-5p	1978-05-01	0.00402782	0.0608622	0	0	5.10015	28.1249	SLC39A9;YME1L1;MAD2L1BP;ALDOA;EIF4G2
hsa-miR-582-5p	7/149	0.004092	0.0614549	0	0	3.68571	20.2667	NCKAP1;SET;RRM2;AMD1;PGGT1B;EIF4G2;MCL1
hsa-miR-2053	1979-05-01	0.00425372	0.0629006	0	0	5.03097	27.4689	KLF10;SMIM13;KIF5B;DCUN1D1;G3BP2
hsa-miR-513c-5p	6/113	0.00426488	0.0629006	0	0	4.18407	22.8339	KLF10;NUS1;FEM1B;UBE2G1;SRP9;TMPO
hsa-miR-514b-5p	6/113	0.00426488	0.0629006	0	0	4.18407	22.8339	KLF10;NUS1;FEM1B;UBE2G1;SRP9;TMPO
hsa-miR-544a	7/151	0.00440083	0.0645193	0	0	3.63414	19.7187	MRS2;NCKAP1;NGRN;NCOA2;LMBRD2;UBQLN1;ALDOA
mmu-miR-543-3p	2025-03-01	0.00444575	0.0647923	0	0	10.1037	54.7198	CAPRIN1;DCUN1D1;WDR43
hsa-miR-151a-3p	1980-05-01	0.0044885	0.0650304	0	0	4.96364	26.8346	FXR1;YWHAQ;RNF4;ACP1;MCL1
hsa-miR-4795-5p	7/152	0.0045617	0.0657045	0	0	3.6089	19.4522	FXR1;RAB5C;PLEKHB2;BTBD1;UBE2D3;PGGT1B;PEX13
hsa-miR-633	1981-05-01	0.00473237	0.0673747	0	0	4.89808	26.221	SON;KIF5B;AMD1;ADAM9;RNF4
mmu-miR-1186b	1981-05-01	0.00473237	0.0673747	0	0	4.89808	26.221	KIF5B;TMTC3;TCEA1;AIDA;GABPB1
hsa-miR-6884-5p	15/521	0.00483112	0.0681647	0	0	2.24374	11.9652	PRIM2;SLC30A6;PLEKHB2;CSNK2A1;TPM3;ACTG1;CKS1B;THAP1;SIKE1;CASP8;PSMC4;RSRC1;ACOT2;NUP35;C16ORF87
hsa-miR-18b-5p	6/116	0.00484523	0.0681647	0	0	4.06934	21.6886	NCKAP1;RAB5C;TWF1;FAM3C;RNF4;AGFG1
hsa-miR-3140-5p	1951-04-01	0.00487088	0.0681647	0	0	6.32164	33.6594	AKIRIN1;ATP6V0E1;PEX13;ARL6IP6
hsa-miR-1267	7/155	0.005071	0.0705643	0	0	3.5352	18.6808	PLSCR1;ATP6V0E1;RBBP4;ELMOD2;PAWR;MAPK14;HNRNPA1L2
hsa-miR-375	14/475	0.00522465	0.0720165	0	0	2.29493	12.0584	ITGB1;NUS1;SET;WDR1;GFM2;MBD2;PLEKHA3;MAT2B;PRDX3;EEA1;LSM12;SON;SNRPA1;FAM3C
hsa-miR-4733-5p	1983-05-01	0.00524809	0.0720165	0	0	4.772	25.0525	SGMS1;ELMOD2;UBE2D3;PAWR;PRELID3B
hsa-miR-183-3p	6/118	0.00526309	0.0720165	0	0	3.99627	20.9686	ITGB1;MFSD14A;RAB5C;TMEM67;FAM3C;ANAPC1
hsa-miR-128-3p	15/527	0.00535568	0.0728787	0	0	2.21676	11.5928	NUS1;AKIRIN1;TMTC3;GCC2;MAPK14;DCK;LSM3;DYNC2LI1;MFSD14B;FUBP3;RBBP4;MIER3;KIF5B;GNAQ;SOS1
hsa-miR-935	6/119	0.00548164	0.0741829	0	0	3.9607	20.6208	ZFAND6;TUBB;PSEN1;ALDOA;ASB3;ACTG1
hsa-miR-496	6/120	0.00570676	0.0768074	0	0	3.92576	20.2809	GPR89A;RALGAPB;PAWR;UBE2V1;HNRNPA1L2;GPR89B
hsa-miR-153-3p	1985-05-01	0.00580237	0.0776698	0	0	4.65223	23.9566	TRUB1;FXR1;SMIM13;MORC3;MCL1
hsa-miR-24-3p	21/854	0.00588912	0.0783643	0	0	1.92105	9.86391	GTF3C2;RAB5C;ATP6V0E1;RRM2;NCBP2;HM13;ACTL6A;GMPS;MAPK14;STRN3;LSM12;PRPF6;RBBP4;POLR2D;EIF4H;YME1L1;B3GNT2;MATR3;ALDOA;AVL9;AGFG1
hsa-miR-3910	6/121	0.00593857	0.0783643	0	0	3.89142	19.9485	ITGB1;MFSD14B;AKIRIN1;TMEM41A;SPRTN;SRP9
hsa-miR-579-3p	7/160	0.00601334	0.0783643	0	0	3.4188	17.483	KLF10;SLC30A6;ARFGEF2;RBBP4;RSRC1;MAPK14;ARL6IP6
hsa-miR-922	7/160	0.00601334	0.0783643	0	0	3.4188	17.483	NCKAP1;KIF5B;G3BP2;UBE2V1;AVL9;GABPA;MAP2K6
hsa-miR-361-5p	7/160	0.00601334	0.0783643	0	0	3.4188	17.483	SON;ECD;G3BP2;RNF4;RAE1;U2SURP;ACTG1
hsa-miR-7159-3p	1986-05-01	0.00609443	0.0784245	0	0	4.59456	23.434	PLEKHF2;SIKE1;SET;MAPK14;MCL1
hsa-miR-4520-5p	2023-09-02	0.00609613	0.0784245	0	0	21.1065	107.645	RRM2;ADAM9
mmu-miR-324-3p	11/337	0.00614931	0.0784245	0	0	2.53787	12.9213	OCLN;RIT1;RALGAPB;YWHAB;FEM1B;RABL3;G3BP2;ADAM10;SCAMP1;MAPK14;GTF2I
hsa-miR-526b-3p	17/640	0.00616161	0.0784245	0	0	2.06907	10.5304	KLF10;ITGB1;ISY1;SMIM13;ATP6V0E1;RRM2;SGMS1;FEM1B;WDR53;GTF2H3;LSM3;U2SURP;C3ORF38;REST;SON;MFN1;EIF4H
hsa-miR-944	6/122	0.00617716	0.0784245	0	0	3.85768	19.6236	FXR1;MFSD14A;PGM3;SLC25A40;DSG2;LSM3
hsa-miR-3919	7/161	0.00621651	0.0785193	0	0	3.39643	17.2557	SET;SON;G3BP2;EIF4H;B3GNT2;UBE2G1;PDIA6
hsa-miR-7160-5p	14/486	0.00635083	0.0791209	0	0	2.24016	11.3334	PRIM2;SLC30A6;GPR89A;PLEKHB2;TPM3;AMD1;GPR89B;THAP1;SIKE1;CASP8;PSMC4;RSRC1;ACOT2;EIF4H
hsa-miR-5094	1955-04-01	0.00637588	0.0791209	0	0	5.82464	29.4449	SGMS1;YWHAB;ERI2;MATR3
hsa-let-7a-3p	6/123	0.00642266	0.0791209	0	0	3.82451	19.3058	KLF10;SGMS1;PGGT1B;DSG2;ARMC8;ACP1
hsa-miR-526b-5p	9/247	0.0064244	0.0791209	0	0	2.83512	14.3107	PLSCR1;GPR89A;YWHAQ;C17ORF80;STAMBP;SCAMP1;GPR89B;C16ORF87;KDM6A
hsa-miR-664b-3p	7/162	0.00642476	0.0791209	0	0	3.37434	17.0323	KLF10;SLC30A6;ARFGEF2;RBBP4;RSRC1;MAPK14;ARL6IP6
hsa-miR-32-3p	6/124	0.00667518	0.081391	0	0	3.79191	18.995	SGMS1;KIF5B;TMEM67;TWF1;ZNF567;ARL6IP6
hsa-miR-655-5p	6/124	0.00667518	0.081391	0	0	3.79191	18.995	NCKAP1;SMIM13;RRM2;NCBP2;AMD1;THAP1
hsa-miR-656-5p	2029-03-01	0.00678948	0.0823768	0	0	8.54757	42.6727	FXR1;SGMS1;G3BP2
hsa-miR-1250-3p	8/207	0.00709935	0.0853973	0	0	3.00845	14.8851	SLC30A6;PPM1A;RSRC1;FEM1B;PSMC1;TMTC3;PLEKHA3;MAPK14
hsa-miR-646	9/251	0.00710778	0.0853973	0	0	2.78768	13.7895	PPM1A;AKIRIN1;REST;INTS14;RALGAPB;CSNK2A1;FEM1B;KIF5B;HNRNPA1L2
hsa-miR-302a-5p	6/126	0.00720171	0.0861059	0	0	3.72833	18.3935	REST;YWHAQ;FEM1B;DCUN1D1;G3BP2;MAP2K6
hsa-miR-4481	6/127	0.00747595	0.0889134	0	0	3.69733	18.1023	MIER3;TMEM67;SNRPA1;SENP2;ALDOA;CCT7
mmu-miR-5101	7/167	0.00754482	0.0889134	0	0	3.26806	15.9707	CTBP2;TPM3;ZNF627;DCUN1D1;G3BP2;PRLR;WDR43
hsa-miR-510-3p	7/167	0.00754482	0.0889134	0	0	3.26806	15.9707	TRUB1;SMIM13;SON;SLC39A9;DSG2;ALDOA;PHF6
hsa-miR-664a-3p	1991-05-01	0.00771107	0.0892855	0	0	4.32633	21.048	MFSD14A;PPM1A;CTBP1;FAM3C;ARL6IP6
hsa-miR-6715b-3p	1991-05-01	0.00771107	0.0892855	0	0	4.32633	21.048	MRS2;TPM3;FEM1B;POLR2D;SRP9
hsa-miR-4451	6/128	0.00775765	0.0892855	0	0	3.66683	17.8174	TRUB1;SET;TPM3;RBM18;ELMOD2;AMD1
hsa-miR-4745-5p	6/128	0.00775765	0.0892855	0	0	3.66683	17.8174	MIER3;TMEM67;SNRPA1;SENP2;ALDOA;CCT7
hsa-miR-4328	6/128	0.00775765	0.0892855	0	0	3.66683	17.8174	KLF10;SET;RRM2;CTBP2;SGMS1;FAM3C
hsa-miR-132-3p	9/255	0.00784552	0.0898768	0	0	2.74179	13.2917	FXR1;TRUB1;NCKAP1;OCLN;PLSCR1;ATP6V0E1;STAU1;AMD1;ARL6IP6
hsa-miR-6872-3p	6/129	0.00804692	0.0911361	0	0	3.63684	17.5385	CSNK2A1;HM13;MFN1;PRLR;THAP1;MAP2K6
hsa-miR-506-3p	6/129	0.00804692	0.0911361	0	0	3.63684	17.5385	MFSD14A;MFSD14B;TMEM41A;HDLBP;SPRTN;SRP9
hsa-miR-519c-3p	11/350	0.00806646	0.0911361	0	0	2.43891	11.7556	KLF10;ISY1;C3ORF38;ATP6V0E1;SGMS1;PLEKHB2;FEM1B;PEX13;SEC23B;U2SURP;LIN52
hsa-miR-1910-5p	1959-04-01	0.00816125	0.0917861	0	0	5.39993	25.9648	ITGB1;YWHAQ;AMD1;HNRNPA1L2
hsa-miR-194-5p	1993-05-01	0.00843399	0.0932752	0	0	4.22757	20.1887	TRUB1;FXR1;BCLAF1;EIF4H;EIF4G2
hsa-miR-6507-5p	6/131	0.00864861	0.0932752	0	0	3.57828	16.9981	TGIF1;MIER3;FIGNL1;UBE2G1;EIF4G2;ACTG1
hsa-miR-130a-5p	6/131	0.00864861	0.0932752	0	0	3.57828	16.9981	DYNC2LI1;KLF10;TSNAX;TPM3;FAM91A1;PDIA6
hsa-miR-133a-3p	6/131	0.00864861	0.0932752	0	0	3.57828	16.9981	RNF168;RAB5C;TPM3;PSMC4;PLEKHA3;MCL1
hsa-miR-3164	1960-04-01	0.00865371	0.0932752	0	0	5.30323	25.1891	PLSCR1;RAB5C;POT1;MAPK14
hsa-miR-3613-3p	14/506	0.00889153	0.0932752	0	0	2.14687	10.1389	TGIF1;AKIRIN1;ATP6V0E1;NFYA;UBE2D3;PLEKHA3;HIPK3;LMBR1;SIKE1;SLC39A9;GNAQ;POLR2D;AVL9;SOS1
hsa-miR-181c-3p	1932-03-01	0.00894784	0.0932752	0	0	7.66217	36.1374	TPM3;G3BP2;HIPK3
hsa-miR-621	1932-03-01	0.00894784	0.0932752	0	0	7.66217	36.1374	MIER3;PAWR;ACTG1
hsa-miR-23c	6/132	0.00896125	0.0932752	0	0	3.5497	16.7363	DYNC2LI1;KLF10;TSNAX;TPM3;FAM91A1;PDIA6
hsa-miR-331-3p	12/405	0.00902923	0.0932752	0	0	2.29756	10.8153	AKIRIN1;PSMC4;MIER3;PGAM1;UBQLN1;YME1L1;UBXN7;ILF2;EIF4G2;ACTG1;THAP1;HSPD1
hsa-miR-302c-3p	14/507	0.00903702	0.0932752	0	0	2.1424	10.0831	KLF10;ISY1;FEM1B;WDR53;TWF1;RNF4;GTF2H3;LSM3;REST;SON;MFN1;AVL9;SEC23B;LIN52
mmu-miR-3966	2023-11-02	0.00914984	0.0932752	0	0	16.4145	77.0499	PLEKHF2;SCAMP1
hsa-miR-519c-5p	1961-04-01	0.0091652	0.0932752	0	0	5.20993	24.4468	OCLN;AMD1;EIF4H;ACTG1
hsa-miR-6820-3p	1961-04-01	0.0091652	0.0932752	0	0	5.20993	24.4468	PLSCR1;RAB5C;POT1;MAPK14
hsa-miR-520c-5p	1961-04-01	0.0091652	0.0932752	0	0	5.20993	24.4468	OCLN;AMD1;EIF4H;ACTG1
hsa-miR-523-5p	1961-04-01	0.0091652	0.0932752	0	0	5.20993	24.4468	OCLN;AMD1;EIF4H;ACTG1
hsa-miR-519b-5p	1961-04-01	0.0091652	0.0932752	0	0	5.20993	24.4468	OCLN;AMD1;EIF4H;ACTG1
hsa-miR-519a-5p	1961-04-01	0.0091652	0.0932752	0	0	5.20993	24.4468	OCLN;AMD1;EIF4H;ACTG1
hsa-miR-518d-5p	1961-04-01	0.0091652	0.0932752	0	0	5.20993	24.4468	OCLN;AMD1;EIF4H;ACTG1
hsa-miR-518f-5p	1961-04-01	0.0091652	0.0932752	0	0	5.20993	24.4468	OCLN;AMD1;EIF4H;ACTG1
hsa-miR-518e-5p	1961-04-01	0.0091652	0.0932752	0	0	5.20993	24.4468	OCLN;AMD1;EIF4H;ACTG1
hsa-miR-526a	1961-04-01	0.0091652	0.0932752	0	0	5.20993	24.4468	OCLN;AMD1;EIF4H;ACTG1
hsa-miR-374c-5p	1995-05-01	0.00920255	0.0932752	0	0	4.13321	19.3776	KIF5B;ARIH1;PSEN1;PEX13;HIPK3
hsa-miR-4773	1995-05-01	0.00920255	0.0932752	0	0	4.13321	19.3776	IPPK;FXR1;RAB5C;AMD1;MCL1
hsa-miR-3925-3p	6/133	0.00928189	0.0936939	0	0	3.52157	16.4799	NUP35;CENPO;ALDOA;CCT7;PRLR;PEX13
mmu-miR-9-5p	14/510	0.0094848	0.0953513	0	0	2.12911	9.91754	ELMOD2;ADAM10;PSEN1;PIK3CB;SCAMP1;RNF4;HS6ST1;FXR1;BCLAF1;MAEA;LMBRD2;SOS1;STAM2;AGFG1
hsa-miR-6871-3p	1996-05-01	0.00960436	0.0961608	0	0	4.08758	18.989	CASP8;FEM1B;SPRTN;ALDOA;MCL1
hsa-miR-522-5p	1962-04-01	0.009696	0.0964061	0	0	5.11984	23.7358	OCLN;AMD1;EIF4H;ACTG1
hsa-miR-29a-3p	9/264	0.00971809	0.0964061	0	0	2.6438	12.2508	ITGB1;REST;CASP8;TMEM237;FEM1B;MORF4L2;TMTC3;SPRTN;MCL1
hsa-miR-7702	1933-03-01	0.0097463	0.0964061	0	0	7.40639	34.298	FXR1;YWHAQ;MCL1
hsa-miR-5681a	6/136	0.0102929	0.101406	0	0	3.43978	15.7414	SET;RAB5C;TPM3;TUBB;TWF1;SENP2
hsa-miR-25-3p	14/517	0.0105978	0.103647	0	0	2.09872	9.54311	ITGB1;TMEM41A;DHX9;TUBB;ACTL6A;AMD1;PAWR;TWF1;UBR1;RNF4;KIF5B;GNAQ;ACP1;EIF4G2
hsa-miR-19a-3p	15/570	0.0106104	0.103647	0	0	2.04043	9.27564	TGIF1;PLEKHF2;NUS1;ATP6V0E1;CSNK2A1;WDR1;ELMOD2;UBE2D3;ARMC8;MAPK14;RNF4;HIPK3;FXR1;G3BP2;PGK1
hsa-miR-216b-5p	6/137	0.0106467	0.103647	0	0	3.41335	15.5051	SMAD1;NGRN;CSNK2A1;CAPN7;TPM3;PGM3
hsa-miR-130b-3p	15/571	0.0107689	0.103663	0	0	2.03666	9.22829	PLEKHF2;ITGB1;NUS1;ATP6V0E1;SGMS1;CSNK2A1;UBE2D3;PEX13;CCT6A;FXR1;C3ORF38;SON;POLR2D;ZNF567;SEC23B
hsa-miR-33a-5p	7/179	0.0108152	0.103663	0	0	3.03819	13.7533	ATP6V0E1;SGMS1;MIER3;CAPRIN1;PGM3;ADAM9;GTF2H3
hsa-miR-570-3p	7/179	0.0108152	0.103663	0	0	3.03819	13.7533	KLF10;ATP6V0E1;TPM3;NCBP2;PGK1;UBQLN1;PHF6
hsa-miR-4687-5p	1964-04-01	0.0108166	0.103663	0	0	4.94868	22.4011	ISY1;TPM3;ALDOA;SRP9
hsa-miR-580-3p	6/138	0.011009	0.105097	0	0	3.38731	15.2735	NUS1;CSNK2A1;PSMC1;C17ORF80;MEMO1;SCAMP1
hsa-miR-1281	7/180	0.0111278	0.105821	0	0	3.02047	13.587	NCKAP1;UBXN7;SCAMP1;ALDOA;SF3B1;CKS1B;STRN3
hsa-miR-5683	5/100	0.0113323	0.106941	0	0	3.91467	17.5381	MORF4L2;PGK1;TCEA1;HS6ST1;SRP9
hsa-miR-636	5/100	0.0113323	0.106941	0	0	3.91467	17.5381	HPS3;UBE2V1;AVL9;PRLR;HNRNPA1L2
hsa-miR-2682-3p	5/101	0.0117953	0.110045	0	0	3.8737	17.1994	HM13;DYRK1A;CENPO;GABPB1;MAPK14
hsa-miR-6781-3p	5/101	0.0117953	0.110045	0	0	3.8737	17.1994	HM13;DYRK1A;CENPO;GABPB1;MAPK14
hsa-miR-595	5/101	0.0117953	0.110045	0	0	3.8737	17.1994	AKIRIN1;ELMOD2;FAM91A1;ACP1;TMPO
hsa-miR-27b-3p	12/421	0.0120022	0.110445	0	0	2.20585	9.75576	DYNC2LI1;NUS1;AKIRIN1;SGMS1;MIER3;NCBP2;FEM1B;ZNF627;TMTC3;UBE2G1;ALDOA;SOS1
hsa-miR-4471	1966-04-01	0.0120175	0.110445	0	0	4.78856	21.1721	NCOA2;INTS14;BTBD1;TUBB
hsa-miR-8059	1966-04-01	0.0120175	0.110445	0	0	4.78856	21.1721	NCOA2;INTS14;BTBD1;TUBB
hsa-miR-1208	1966-04-01	0.0120175	0.110445	0	0	4.78856	21.1721	SET;TMEM67;AIDA;MAPK14
hsa-miR-561-3p	6/141	0.0121481	0.11123	0	0	3.31153	14.6058	FXR1;LSM12;BCLAF1;SON;YWHAQ;TWF1
hsa-miR-3158-5p	5/102	0.0122709	0.111525	0	0	3.83357	16.8697	MRS2;AKIRIN1;RALGAPB;CSNK2A1;UBE2G1
hsa-miR-657	5/102	0.0122709	0.111525	0	0	3.83357	16.8697	RAB5C;PGAM1;MEMO1;AIDA;LSM3
hsa-miR-10a-3p	1967-04-01	0.0126488	0.114536	0	0	4.71231	20.5937	NCBP2;ELMOD2;B3GNT2;GTF2I
hsa-miR-6077	9/277	0.012995	0.116913	0	0	2.51388	10.9183	FXR1;MFSD14B;LSM12;RAB5C;MIER3;TPM3;HDLBP;ARIH1;LSM3
hsa-miR-1-3p	21/920	0.0130062	0.116913	0	0	1.7738	7.70242	RAB5C;PLEKHB2;CTBP2;CTBP1;TPM3;ELMOD2;DCUN1D1;TWF1;HIPK3;HSPD1;FUBP3;YWHAQ;KIF5B;CAPRIN1;G3BP2;B3GNT2;DSG2;MATR3;STAMBP;HNRNPA1L2;SLC39A3
hsa-miR-607	8/231	0.0131986	0.117588	0	0	2.68137	11.604	PRDX3;MRS2;KLF10;RALGAPB;CSNK2A1;POLR2D;PDIA6;GTF2I
hsa-miR-6744-5p	1968-04-01	0.0133008	0.117588	0	0	4.63844	20.0378	RNF168;MFSD14B;YWHAB;LIN52
hsa-miR-520g-5p	1937-03-01	0.0133454	0.117588	0	0	6.53372	28.2034	AMD1;EIF4G2;ACTG1
hsa-miR-4999-3p	1937-03-01	0.0133454	0.117588	0	0	6.53372	28.2034	SMIM13;POT1;HIPK3
hsa-miR-597-3p	1937-03-01	0.0133454	0.117588	0	0	6.53372	28.2034	TGIF1;STAMBP;ACTG1
hsa-miR-513b-5p	6/144	0.0133677	0.117588	0	0	3.23905	13.9762	FXR1;FAM3C;AIDA;MAPK14;HNRNPA1L2;THAP1
hsa-miR-9-3p	5/105	0.0137755	0.119891	0	0	3.71799	15.9311	ITGB1;REST;TSC22D1;GCC2;CKS1B
hsa-miR-139-5p	5/105	0.0137755	0.119891	0	0	3.71799	15.9311	IPPK;KLF10;ZBTB26;STAMBP;MCL1
hsa-miR-511-5p	5/105	0.0137755	0.119891	0	0	3.71799	15.9311	GPR89A;FEM1B;UBE2V1;GPR89B;DCK
mmu-miR-1b-5p	5/106	0.0143035	0.123523	0	0	3.68099	15.6341	ATF2;CASP8;CCDC138;B3GNT2;GABPB1
hsa-miR-487a-5p	1938-03-01	0.014348	0.123523	0	0	6.34672	26.9364	SMIM13;POLR2D;PGGT1B
hsa-miR-374a-5p	9/282	0.0144524	0.123523	0	0	2.4672	10.4533	PRDX3;TRUB1;NUS1;STAU1;MIER3;YME1L1;SNRPA1;SEC23B;SLC25A24
hsa-miR-421	8/235	0.0145033	0.123523	0	0	2.63358	11.149	ISY1;REST;RALGAPB;RSRC1;UBE2D3;POLR2D;SRP9;EIF4G2
hsa-miR-31-3p	1970-04-01	0.0146681	0.123523	0	0	4.49743	18.9885	NUS1;PLEKHB2;NCBP2;DCK
hsa-miR-548ba	1970-04-01	0.0146681	0.123523	0	0	4.49743	18.9885	PPM1A;AKIRIN1;CSNK2A1;PAWR
hsa-miR-4280	1970-04-01	0.0146681	0.123523	0	0	4.49743	18.9885	SLC30A6;SLC39A9;TWF1;SCAMP1
mmu-miR-760-3p	2014-02-01	0.0147425	0.123523	0	0	12.309	51.9072	ECD;GABPA
mmu-miR-361-5p	2014-02-01	0.0147425	0.123523	0	0	12.309	51.9072	EEA1;CTBP2
hsa-miR-339-3p	2014-02-01	0.0147425	0.123523	0	0	12.309	51.9072	AKIRIN1;MCL1
hsa-miR-4666a-3p	5/107	0.0148448	0.123523	0	0	3.64472	15.3447	KLF10;SON;SGMS1;DSG2;ACP1
hsa-miR-8062	5/107	0.0148448	0.123523	0	0	3.64472	15.3447	AKIRIN1;OCLN;RABL3;PGM3;TWF1
mmu-miR-297c-5p	5/107	0.0148448	0.123523	0	0	3.64472	15.3447	SIKE1;CASP8;GNAQ;B3GNT2;GABPB1
hsa-miR-744-5p	12/435	0.0151762	0.123549	0	0	2.1313	8.92595	MRS2;SGMS1;HM13;PKP2;NUP153;MATR3;SENP2;GART;STAM2;ANAPC1;ACTG1;HSPD1
hsa-miR-548ai	1971-04-01	0.0153838	0.123549	0	0	4.43008	18.4931	PPM1A;AKIRIN1;CSNK2A1;PAWR
hsa-miR-4645-3p	1971-04-01	0.0153838	0.123549	0	0	4.43008	18.4931	PGAM1;G3BP2;SRP9;HIPK3
mmu-miR-141-3p	1939-03-01	0.0153921	0.123549	0	0	6.17011	25.7534	LSM12;MAPK14;HIPK3
mmu-miR-5119	1939-03-01	0.0153921	0.123549	0	0	6.17011	25.7534	RNF168;CASP8;WDR43
hsa-miR-625-3p	1939-03-01	0.0153921	0.123549	0	0	6.17011	25.7534	CCT6A;CSNK2A1;MAP2K6
hsa-miR-154-3p	1939-03-01	0.0153921	0.123549	0	0	6.17011	25.7534	SMIM13;HPS3;LIN52
mmu-miR-297b-5p	5/108	0.0153997	0.123549	0	0	3.60915	15.0625	SIKE1;CASP8;GNAQ;B3GNT2;GABPB1
hsa-miR-4683	5/108	0.0153997	0.123549	0	0	3.60915	15.0625	REST;YWHAQ;YWHAB;TUBB;DYRK1A
hsa-miR-3674	5/108	0.0153997	0.123549	0	0	3.60915	15.0625	ATP6V0E1;NCBP2;SNRPA1;SCAMP1;HNRNPA1L2
hsa-miR-6758-3p	5/108	0.0153997	0.123549	0	0	3.60915	15.0625	PPM1A;TPM3;CTBP1;YWHAB;FEM1B
hsa-miR-6844	5/109	0.0159683	0.127674	0	0	3.57426	14.7873	CAPRIN1;DYRK1A;SLC3A2;HNRNPA1L2;DCK
hsa-miR-196b-5p	6/150	0.0160593	0.127674	0	0	3.10314	12.8205	SLC30A6;TUBB;POLR2D;PLEKHA3;ALDOA;SRP9
hsa-miR-570-5p	1972-04-01	0.0161212	0.127674	0	0	4.36471	18.0159	PPM1A;AKIRIN1;CSNK2A1;PAWR
hsa-miR-4326	1972-04-01	0.0161212	0.127674	0	0	4.36471	18.0159	PLSCR1;NFYA;FEM1B;G3BP2
hsa-miR-760	7/194	0.0162192	0.128038	0	0	2.79234	11.5088	ATP6V0E1;SON;CSNK2A1;HM13;XRN2;HNRNPA1L2;PRLR
mmu-miR-3572-3p	1940-03-01	0.0164781	0.128435	0	0	6.00305	24.6469	SGMS1;PDXDC1;TUBB
hsa-miR-5195-5p	1940-03-01	0.0164781	0.128435	0	0	6.00305	24.6469	PPM1A;MIER3;CCT7
hsa-miR-4515	1940-03-01	0.0164781	0.128435	0	0	6.00305	24.6469	SET;RRM2;TPM3
hsa-miR-487b-5p	1940-03-01	0.0164781	0.128435	0	0	6.00305	24.6469	SMIM13;POLR2D;PGGT1B
hsa-miR-1305	7/195	0.0166368	0.129263	0	0	2.77735	11.3764	KLF10;NCKAP1;RSRC1;TMTC3;GTF2I;MAP2K6;SLC25A24
hsa-miR-4657	1973-04-01	0.0168804	0.129521	0	0	4.30123	17.5559	OCLN;FIGNL1;UBE2D3;SRP9
hsa-miR-548ag	1973-04-01	0.0168804	0.129521	0	0	4.30123	17.5559	PPM1A;AKIRIN1;CSNK2A1;PAWR
hsa-miR-4491	1973-04-01	0.0168804	0.129521	0	0	4.30123	17.5559	OCLN;FIGNL1;UBE2D3;SRP9
hsa-miR-4712-3p	1973-04-01	0.0168804	0.129521	0	0	4.30123	17.5559	MEMO1;UBE2G1;MAPK14;DCK
hsa-miR-605-5p	5/111	0.0171471	0.131159	0	0	3.50647	14.257	PSMD10;SGMS1;CAPN7;ELMOD2;ACTG1
hsa-miR-4684-5p	9/291	0.0173752	0.131273	0	0	2.38736	9.67527	TGIF1;NCKAP1;RSRC1;TPM3;SLC39A9;PPP1R8;AMD1;UBXN7;ALDOA
hsa-miR-548h-3p	9/291	0.0173752	0.131273	0	0	2.38736	9.67527	RSRC1;XRN2;POLR2D;PGM3;UBE2V1;PDIA6;HIPK3;U2SURP;STRN3
hsa-miR-548bb-3p	9/291	0.0173752	0.131273	0	0	2.38736	9.67527	RSRC1;XRN2;POLR2D;PGM3;UBE2V1;PDIA6;HIPK3;U2SURP;STRN3
hsa-miR-548z	9/291	0.0173752	0.131273	0	0	2.38736	9.67527	RSRC1;XRN2;POLR2D;PGM3;UBE2V1;PDIA6;HIPK3;U2SURP;STRN3
hsa-miR-5701	1974-04-01	0.0176616	0.132939	0	0	4.23957	17.1124	GPR89A;PLSCR1;GPR89B;PRLR
hsa-miR-548ac	9/292	0.0177247	0.132939	0	0	2.3788	9.59321	RSRC1;XRN2;POLR2D;PGM3;UBE2V1;PDIA6;HIPK3;U2SURP;STRN3
mmu-miR-876-5p	5/112	0.0177575	0.132939	0	0	3.47352	14.0016	TRUB1;SENP5;TUBB;KNOP1;SLC3A2
hsa-miR-4424	1975-04-01	0.018465	0.137605	0	0	4.17964	16.6846	GPR89A;SIKE1;PIK3CB;GPR89B
hsa-miR-519b-3p	10/344	0.0184926	0.137605	0	0	2.24227	8.94753	KLF10;C3ORF38;ATP6V0E1;SGMS1;PLEKHB2;FEM1B;PEX13;SEC23B;U2SURP;LIN52
hsa-miR-151b	1942-03-01	0.0187759	0.138522	0	0	5.69462	22.6372	SLC39A9;YME1L1;ALDOA
hsa-miR-548d-3p	9/295	0.0188041	0.138522	0	0	2.35348	9.35199	RSRC1;XRN2;POLR2D;PGM3;UBE2V1;PDIA6;HIPK3;U2SURP;STRN3
hsa-miR-98-3p	5/114	0.0190212	0.138522	0	0	3.40944	13.5089	KLF10;SGMS1;PGGT1B;DSG2;ACP1
hsa-let-7f-1-3p	5/114	0.0190212	0.138522	0	0	3.40944	13.5089	KLF10;SGMS1;PGGT1B;DSG2;ACP1
hsa-let-7e-5p	15/612	0.0190341	0.138522	0	0	1.89273	7.4981	PRIM2;RRM2;MBD2;AMD1;TMTC3;GMPS;PLEKHA3;OCLN;RBBP4;YWHAQ;POLR2D;MATR3;ARIH1;EIF4G2;GTF2I
hsa-let-7f-5p	11/397	0.0190698	0.138522	0	0	2.13675	8.4608	PRIM2;RRM2;YWHAQ;MBD2;AMD1;POLR2D;TMTC3;PLEKHA3;ARMC8;ARIH1;EIF4G2
mmu-miR-3092-3p	2016-02-01	0.0191009	0.138522	0	0	10.5495	41.7551	ZNF567;EIF4G2
hsa-miR-1252-3p	6/156	0.0191043	0.138522	0	0	2.9781	11.7868	TSNAX;EIF4H;ADAM9;TWF1;PAWR;GTF2I
hsa-miR-653-5p	1976-04-01	0.0192907	0.138522	0	0	4.12138	16.2718	ELMOD2;GNAQ;PAWR;ALDOA
hsa-miR-5006-5p	1976-04-01	0.0192907	0.138522	0	0	4.12138	16.2718	RRM2;RBBP4;BTBD1;ACTG1
hsa-miR-7849-3p	1976-04-01	0.0192907	0.138522	0	0	4.12138	16.2718	KLF10;SON;TWF1;ASB3
hsa-miR-8067	1976-04-01	0.0192907	0.138522	0	0	4.12138	16.2718	TRUB1;AMD1;NUP35;MCL1
hsa-miR-431-5p	6/157	0.0196475	0.140054	0	0	2.95823	11.6252	GPR89A;PLSCR1;RBBP4;NCBP2;GPR89B;THAP1
hsa-miR-3161	5/115	0.0196746	0.140054	0	0	3.37827	13.2713	PRDX3;NGRN;TMEM41A;SLC25A40;EIF4G2
hsa-miR-3688-3p	5/115	0.0196746	0.140054	0	0	3.37827	13.2713	PLEKHF2;YWHAQ;G3BP2;SPRTN;SRP9
hsa-miR-133a-5p	1943-03-01	0.0199879	0.141874	0	0	5.55197	21.7228	SLC39A9;FEM1B;LIN52
hsa-miR-548b-3p	1977-04-01	0.0201389	0.14201	0	0	4.06472	15.8731	MORF4L2;GNAQ;PGK1;SPRTN
hsa-miR-4761-5p	1977-04-01	0.0201389	0.14201	0	0	4.06472	15.8731	FXR1;SLC30A6;CACYBP;UBE2V1
hsa-miR-519a-3p	10/349	0.0202107	0.14201	0	0	2.20863	8.61707	KLF10;C3ORF38;ATP6V0E1;SGMS1;PLEKHB2;FEM1B;PEX13;SEC23B;U2SURP;LIN52
hsa-miR-100-5p	8/250	0.0202377	0.14201	0	0	2.46845	9.62746	SET;RAB5C;RRM2;TSC22D1;MORF4L2;UBQLN1;ANAPC1;PRELID3B
hsa-let-7b-3p	5/116	0.0203426	0.14206	0	0	3.34767	13.0393	KLF10;SGMS1;PGGT1B;DSG2;ACP1
hsa-miR-4668-5p	11/401	0.0203602	0.14206	0	0	2.1144	8.23384	TGIF1;IPPK;REST;SET;NFYA;MORF4L2;POLR2D;HDLBP;UBXN7;ARIH1;AVL9
hsa-miR-6130	9/300	0.0207082	0.143674	0	0	2.31245	8.9659	RRM2;TPM3;TUBB;UBE2D3;HDLBP;UBE2V1;SENP2;HS6ST1;C16ORF87
hsa-miR-4419a	9/300	0.0207082	0.143674	0	0	2.31245	8.9659	RRM2;TPM3;TUBB;UBE2D3;HDLBP;UBE2V1;SENP2;HS6ST1;C16ORF87
hsa-miR-6864-5p	1978-04-01	0.0210098	0.145357	0	0	4.00959	15.4881	NCOA2;UBE2D3;C17ORF80;PDIA6
hsa-miR-6129	9/301	0.0211051	0.145607	0	0	2.30441	8.89098	RRM2;TPM3;TUBB;UBE2D3;HDLBP;UBE2V1;SENP2;HS6ST1;C16ORF87
hsa-miR-645	1944-03-01	0.0212421	0.146002	0	0	5.41628	20.8623	NFYA;MEMO1;ALDOA
hsa-miR-1276	6/160	0.0213401	0.146002	0	0	2.90015	11.1574	SON;YWHAQ;TPM3;MORF4L2;LAMP2;PGGT1B
hsa-miR-136-5p	6/160	0.0213401	0.146002	0	0	2.90015	11.1574	CSNK2A1;UBE2D3;TMTC3;GMPS;G3BP2;UBQLN1
mmu-miR-1843a-5p	2017-02-01	0.021458	0.146247	0	0	9.84569	37.8238	ZNF567;PRLR
hsa-miR-4510	9/302	0.0215074	0.146247	0	0	2.29643	8.81681	RRM2;TPM3;TUBB;UBE2D3;HDLBP;UBE2V1;SENP2;HS6ST1;C16ORF87
hsa-miR-1228-3p	8/253	0.0215541	0.146247	0	0	2.43785	9.35448	RNF168;ATP6V0E1;RBBP4;KIF5B;YME1L1;ADAM9;UBE2V1;THAP1
hsa-miR-6873-5p	7/206	0.0217437	0.146677	0	0	2.62235	10.0395	RRM2;SLC39A9;TPM3;PGAM1;AMD1;UBE2V1;SENP2
hsa-miR-214-3p	7/206	0.0217437	0.146677	0	0	2.62235	10.0395	PSMD10;YWHAQ;TPM3;TWF1;UBE2V1;MAPK14;HSPD1
hsa-miR-15a-3p	1979-04-01	0.0219034	0.146677	0	0	3.95592	15.116	TRUB1;PLSCR1;OCLN;HM13
hsa-miR-4663	1979-04-01	0.0219034	0.146677	0	0	3.95592	15.116	GPR89A;PLEKHB2;EIF4H;GPR89B
hsa-miR-196a-5p	9/303	0.0219153	0.146677	0	0	2.2885	8.74338	SLC30A6;TUBB;PGAM1;POLR2D;TIMM23;PLEKHA3;PEX13;SRP9;LSM3
hsa-miR-4781-3p	7/207	0.0222562	0.148033	0	0	2.6091	9.92799	STAU1;YWHAB;NCBP2;RABL3;GMPS;YME1L1;TMPO
hsa-miR-6127	9/304	0.0223286	0.148033	0	0	2.28063	8.67068	RRM2;TPM3;TUBB;UBE2D3;HDLBP;UBE2V1;SENP2;HS6ST1;C16ORF87
hsa-miR-6133	9/304	0.0223286	0.148033	0	0	2.28063	8.67068	RRM2;TPM3;TUBB;UBE2D3;HDLBP;UBE2V1;SENP2;HS6ST1;C16ORF87
hsa-miR-6778-3p	16/681	0.0223644	0.148033	0	0	1.81317	6.89054	AKIRIN1;RRM2;HM13;GMPS;WDR53;CACYBP;SCAMP1;GTF2H3;STRN3;CKS1B;THAP1;ACOT2;RABL3;UBXN7;SF3B1;MCL1
hsa-miR-367-5p	6/162	0.0225217	0.148033	0	0	2.86268	10.8589	PLSCR1;ATP6V0E1;RBBP4;ELMOD2;MAPK14;HNRNPA1L2
mmu-miR-20a-5p	1945-03-01	0.0225386	0.148033	0	0	5.28706	20.0513	EGLN1;REST;MAPK14
hsa-miR-3126-3p	1945-03-01	0.0225386	0.148033	0	0	5.28706	20.0513	ANAPC7;TMTC3;TMPO
hsa-miR-335-3p	9/305	0.0227476	0.148692	0	0	2.2728	8.59869	ARFGEF2;NCKAP1;RSRC1;DYRK1A;MAPK14;MRPS18C;GTF2I;HSPD1;SLC25A24
hsa-miR-6760-3p	1980-04-01	0.02282	0.148692	0	0	3.90367	14.7563	TMEM67;DSG2;AIDA;MAPK14
hsa-miR-3975	1980-04-01	0.02282	0.148692	0	0	3.90367	14.7563	CSNK2A1;SLC39A9;CKS1B;ACTG1
hsa-miR-103a-2-5p	1981-04-01	0.0237596	0.154	0	0	3.85278	14.4085	SIKE1;CSNK2A1;TMEM67;ALDOA
hsa-miR-433-3p	1981-04-01	0.0237596	0.154	0	0	3.85278	14.4085	RAB5C;FAM3C;SCAMP1;ALDOA
hsa-miR-6720-3p	1946-03-01	0.0238772	0.154129	0	0	5.16384	19.2861	ISY1;ALDOA;PRLR
hsa-miR-4251	5/121	0.0239047	0.154129	0	0	3.20255	11.9573	REST;CTBP1;TUBB;GMPS;LIN52
hsa-miR-298	6/165	0.0243755	0.156346	0	0	2.80824	10.4303	AKIRIN1;RALGAPB;RAB5C;PLEKHB2;DYRK1A;G3BP2
hsa-miR-769-3p	6/165	0.0243755	0.156346	0	0	2.80824	10.4303	STAU1;CACYBP;FAM3C;RNF4;ACTG1;THAP1
hsa-miR-512-3p	9/309	0.0244798	0.156607	0	0	2.24204	8.31775	ISY1;FEM1B;MFN1;WDR53;RNF4;GTF2H3;SEC23B;LSM3;LIN52
hsa-miR-206	5/122	0.0246623	0.157366	0	0	3.17502	11.7554	RAB5C;ACTL6A;TWF1;MATR3;STAMBP
hsa-miR-378a-3p	6/166	0.0250155	0.159207	0	0	2.79054	10.2922	KLF10;C3ORF38;REST;EIF4H;RNPS1;HIPK3
hsa-miR-4299	1947-03-01	0.025258	0.159514	0	0	5.04622	18.5631	YWHAB;LIN52;C16ORF87
hsa-miR-3162-3p	1947-03-01	0.025258	0.159514	0	0	5.04622	18.5631	PPM1A;CSNK2A1;TWF1
hsa-miR-7112-3p	1947-03-01	0.025258	0.159514	0	0	5.04622	18.5631	CTBP2;UBE2V1;U2SURP
hsa-miR-552-3p	6/167	0.0256666	0.16168	0	0	2.77307	10.1565	ARFGEF2;DDX47;EIF4H;NUP153;CACYBP;ALDOA
hsa-miR-4458	9/312	0.0258392	0.161939	0	0	2.2195	8.11418	PRIM2;RRM2;MBD2;AMD1;POLR2D;TMTC3;PLEKHA3;ARIH1;EIF4G2
hsa-miR-4500	9/312	0.0258392	0.161939	0	0	2.2195	8.11418	PRIM2;RRM2;MBD2;AMD1;POLR2D;TMTC3;PLEKHA3;ARIH1;EIF4G2
hsa-miR-3666	10/364	0.026065	0.162939	0	0	2.11341	7.70795	CCT6A;FXR1;PLEKHF2;NUS1;ATP6V0E1;CSNK2A1;UBE2D3;POLR2D;PEX13;SEC23B
hsa-miR-2278	5/124	0.0262234	0.163515	0	0	3.12134	11.3651	MFSD14B;RAB5C;TPM3;FIGNL1;C16ORF87
hsa-miR-1183	1984-04-01	0.0267179	0.164928	0	0	3.70774	13.431	PLEKHF2;CSNK2A1;RBBP4;MAPK14
hsa-miR-4790-3p	1984-04-01	0.0267179	0.164928	0	0	3.70774	13.431	EGLN1;SMIM13;UBE2D3;STAMBP
hsa-miR-133b	1984-04-01	0.0267179	0.164928	0	0	3.70774	13.431	RNF168;RAB5C;TPM3;MCL1
hsa-miR-4261	1984-04-01	0.0267179	0.164928	0	0	3.70774	13.431	G3BP2;SPRTN;GABPA;TMPO
mmu-miR-30e-5p	10/366	0.0269287	0.1654	0	0	2.10132	7.59535	CSNK2A1;MIER3;CAPN7;FEM1B;KIF5B;PGGT1B;ADAM9;AVL9;EIF4G2;MCL1
hsa-miR-4295	10/366	0.0269287	0.1654	0	0	2.10132	7.59535	CCT6A;FXR1;PLEKHF2;NUS1;ATP6V0E1;CSNK2A1;UBE2D3;POLR2D;PEX13;SEC23B
hsa-miR-138-5p	5/125	0.0270271	0.165592	0	0	3.09517	11.1764	CAPN7;FEM1B;UBE2V1;LIN52;C16ORF87
hsa-miR-8055	9/316	0.0277339	0.169183	0	0	2.19013	7.85182	PLSCR1;RBBP4;AMD1;POLR2D;ACOT2;MAPK14;STRN3;MAP2K6;THAP1
hsa-miR-7159-5p	1985-04-01	0.0277507	0.169183	0	0	3.66177	13.1256	REST;RSRC1;UBE2D3;HDLBP
hsa-miR-6804-5p	5/126	0.0278464	0.169347	0	0	3.06943	10.9918	RAB5C;PGAM1;YME1L1;SENP2;MAP2K6
hsa-miR-208b-3p	1949-03-01	0.0281461	0.170748	0	0	4.82633	17.2317	SIKE1;RAB5C;TUBB
hsa-miR-4495	5/127	0.0286812	0.173567	0	0	3.04412	10.8112	LSM12;SIKE1;SGMS1;AMD1;ADAM9
hsa-miR-4668-3p	6/172	0.0290913	0.175617	0	0	2.68885	9.51133	RRM2;GNAQ;ELMOD2;ARIH1;ANAPC1;EIF4G2
hsa-miR-498	9/319	0.0292178	0.175787	0	0	2.1686	7.66161	NCKAP1;MORF4L2;TMTC3;UBXN7;GABPB1;ALDOA;SF3B1;PDIA6;HSPD1
hsa-miR-150-5p	13/534	0.0292621	0.175787	0	0	1.87238	6.61223	ISY1;AKIRIN1;NFYA;AMD1;WDR53;CACYBP;GTF2H3;PDIA6;THAP1;PPM1A;PSMC1;RABL3;ALDOA
hsa-miR-6515-5p	5/128	0.0295318	0.176414	0	0	3.01922	10.6346	RAB5C;TUBB;TMEM67;UBE2D3;UBE2V1
hsa-miR-193a-3p	5/128	0.0295318	0.176414	0	0	3.01922	10.6346	SENP5;SPRTN;PGM3;ASB3;MCL1
hsa-miR-152-5p	1950-03-01	0.0296531	0.176414	0	0	4.7234	16.6178	STAMBP;CENPO;ACTG1
hsa-miR-7153-3p	1950-03-01	0.0296531	0.176414	0	0	4.7234	16.6178	MFN1;RNPS1;MCL1
hsa-miR-548as-3p	6/173	0.0298105	0.176923	0	0	2.67262	9.38862	NCKAP1;SON;MIER3;PLEKHA3;PDIA6;PRELID3B
hsa-miR-22-5p	1987-04-01	0.0298872	0.176952	0	0	3.57318	12.543	LMBR1;BCLAF1;CAPRIN1;STAMBP
hsa-miR-4766-5p	5/129	0.0303981	0.179116	0	0	2.99472	10.4617	ATP6V0E1;SON;EIF4H;TWF1;ARIH1
hsa-miR-577	5/129	0.0303981	0.179116	0	0	2.99472	10.4617	TSNAX;UBE2D3;UBQLN1;TWF1;FAM3C
hsa-miR-493-3p	1988-04-01	0.0309909	0.181706	0	0	3.53046	12.265	DDB1;UBE2D3;PAWR;ALDOA
hsa-miR-301b-3p	10/375	0.0310698	0.181706	0	0	2.04855	7.11159	CCT6A;FXR1;PLEKHF2;NUS1;ATP6V0E1;CSNK2A1;UBE2D3;POLR2D;PEX13;SEC23B
hsa-miR-6759-3p	1951-03-01	0.031202	0.181706	0	0	4.62477	16.0353	RBBP4;MAPK14;SEC23B
hsa-miR-148b-5p	1951-03-01	0.031202	0.181706	0	0	4.62477	16.0353	EIF4H;UBQLN1;MCL1
hsa-miR-1913	5/130	0.0312803	0.181706	0	0	2.97061	10.2925	HM13;G3BP2;PGK1;WDR53;SEC23B
hsa-miR-1324	5/130	0.0312803	0.181706	0	0	2.97061	10.2925	SET;POLR2D;RNPS1;AVL9;MAP2K6
mmu-miR-1199-5p	8/273	0.0319106	0.1848	0	0	2.25154	7.75615	TRUB1;SENP5;TUBB;KNOP1;SLC3A2;UBR1;RNF4;ARL6IP6
mmu-miR-92a-3p	2021-02-01	0.0319905	0.1848	0	0	7.77134	26.7514	ZNF567;HIPK3
hsa-miR-6814-5p	6/176	0.032038	0.1848	0	0	2.62505	9.03236	PPM1A;AKIRIN1;LMBRD2;RABL3;CACYBP;THAP1
hsa-miR-2467-5p	1989-04-01	0.0321183	0.18483	0	0	3.48875	11.9955	CSNK2A1;B3GNT2;CKS1B;ACTG1
hsa-miR-224-5p	5/132	0.0330924	0.189992	0	0	2.92353	9.9647	AKIRIN1;FEM1B;MBD2;TMTC3;HIPK3
hsa-miR-5700	1990-04-01	0.0332696	0.190123	0	0	3.448	11.7339	TGIF1;TRUB1;MORC3;DSG2
hsa-miR-4709-5p	1990-04-01	0.0332696	0.190123	0	0	3.448	11.7339	RSRC1;POLR2D;SLC3A2;U2SURP
hsa-miR-4794	5/133	0.0340225	0.193082	0	0	2.90054	9.80595	RRM2;RSRC1;UBE2D3;CENPO;HNRNPA1L2
hsa-miR-664a-5p	5/133	0.0340225	0.193082	0	0	2.90054	9.80595	RRM2;RSRC1;UBE2D3;CENPO;HNRNPA1L2
hsa-miR-188-3p	5/133	0.0340225	0.193082	0	0	2.90054	9.80595	C3ORF38;CSNK2A1;UBE2D3;UBE2V1;ARL6IP6
hsa-miR-625-5p	7/227	0.0343261	0.193251	0	0	2.36948	7.98954	RSRC1;HDLBP;EIF4H;PLEKHA3;ARIH1;UBE2V1;SENP2
hsa-miR-3682-5p	1953-03-01	0.0344248	0.193251	0	0	4.43932	14.956	CASP8;FEM1B;MORF4L2
hsa-miR-4506	1953-03-01	0.0344248	0.193251	0	0	4.43932	14.956	LMBR1;RAB5C;ARIH1
hsa-miR-576-3p	1991-04-01	0.0344447	0.193251	0	0	3.4082	11.4802	OCLN;YWHAQ;AMD1;AGFG1
hsa-miR-6833-5p	1991-04-01	0.0344447	0.193251	0	0	3.4082	11.4802	OCLN;REST;UBE2D3;SRP9
mmu-miR-3067-5p	2022-02-01	0.034883	0.195211	0	0	7.3824	24.7735	ZBTB26;DSG2
hsa-miR-4279	12/492	0.0349526	0.195211	0	0	1.87267	6.28048	AKIRIN1;HM13;LAMP2;RABL3;G3BP2;MAPK14;ALDOA;HNRNPA1L2;PRLR;ANAPC1;CKS1B;THAP1
hsa-miR-4699-3p	1992-04-01	0.0356437	0.198018	0	0	3.3693	11.2339	FXR1;SET;B3GNT2;TWF1
hsa-miR-4772-3p	9/331	0.0357103	0.198018	0	0	2.08649	6.95285	SET;HM13;POLR2D;ACOT2;UBXN7;MATR3;ALDOA;AVL9;SEC23B
hsa-miR-423-3p	7/229	0.0357322	0.198018	0	0	2.3479	7.82249	MFSD14A;SLC30A6;SET;YWHAQ;RBBP4;HDLBP;SF3B1
hsa-miR-205-5p	6/181	0.0359861	0.198018	0	0	2.5494	8.47578	SMAD1;SMIM13;RBBP4;MAPK14;PRLR;ACP1
hsa-miR-6838-3p	1954-03-01	0.0360983	0.198018	0	0	4.35206	14.4554	RALGAPB;PGK1;PEX13
hsa-miR-487a-3p	1954-03-01	0.0360983	0.198018	0	0	4.35206	14.4554	SMIM13;HPS3;LIN52
hsa-miR-556-3p	1954-03-01	0.0360983	0.198018	0	0	4.35206	14.4554	G3BP2;TWF1;DSG2
hsa-miR-208a-3p	1954-03-01	0.0360983	0.198018	0	0	4.35206	14.4554	SIKE1;RAB5C;TUBB
hsa-miR-3179	6/182	0.0368116	0.20089	0	0	2.53478	8.3697	TGIF1;NCOA2;HDLBP;UBE2V1;SENP2;PDIA6
hsa-miR-4482-3p	1993-04-01	0.0368666	0.20089	0	0	3.33127	10.9947	PLEKHF2;BTBD1;UBQLN1;MAPK14
hsa-miR-3143	1993-04-01	0.0368666	0.20089	0	0	3.33127	10.9947	AMD1;MATR3;FAM3C;ARIH1
hsa-let-7i-5p	9/334	0.0374769	0.203436	0	0	2.06691	6.7878	PRIM2;RRM2;MBD2;AMD1;POLR2D;TMTC3;PLEKHA3;ARIH1;EIF4G2
hsa-miR-3972	1955-03-01	0.0378131	0.203436	0	0	4.26815	13.9786	RBBP4;BTBD1;ACTG1
hsa-miR-4777-5p	1955-03-01	0.0378131	0.203436	0	0	4.26815	13.9786	OCLN;AMD1;EIF4H
hsa-miR-941	1955-03-01	0.0378131	0.203436	0	0	4.26815	13.9786	DDB1;EIF4H;CKS1B
mmu-miR-1940	2023-02-01	0.0378726	0.203436	0	0	7.0305	23.0145	ZNF567;PRLR
hsa-miR-6780b-5p	7/232	0.037912	0.203436	0	0	2.31623	7.57985	CSNK2A1;MIER3;HDLBP;EIF4H;ARIH1;UBE2V1;SENP2
hsa-miR-4725-3p	7/232	0.037912	0.203436	0	0	2.31623	7.57985	CSNK2A1;MIER3;HDLBP;EIF4H;ARIH1;UBE2V1;SENP2
hsa-miR-212-3p	1994-04-01	0.0381134	0.20363	0	0	3.29409	10.7624	TRUB1;FXR1;OCLN;AMD1
hsa-miR-4799-5p	1994-04-01	0.0381134	0.20363	0	0	3.29409	10.7624	KLF10;PLEKHB2;CSNK2A1;ADAM9
hsa-miR-143-5p	10/389	0.0383755	0.204586	0	0	1.97146	6.42761	KLF10;PLEKHB2;YWHAB;PGAM1;DYRK1A;G3BP2;YME1L1;MEMO1;SEC23B;LIN52
hsa-miR-3187-3p	7/233	0.0386576	0.205645	0	0	2.30587	7.50101	EGLN1;ISY1;RBBP4;FIGNL1;GMPS;YME1L1;THAP1
hsa-miR-8052	5/138	0.0389155	0.206127	0	0	2.79078	9.05989	SET;SON;TPM3;GMPS;SF3B1
hsa-miR-3199	5/138	0.0389155	0.206127	0	0	2.79078	9.05989	SET;SON;TPM3;GMPS;SF3B1
hsa-miR-6073	1995-04-01	0.0393842	0.207358	0	0	3.25772	10.5367	KIF5B;MORF4L2;TWF1;SCAMP1
hsa-miR-4697-3p	1956-03-01	0.0395688	0.207358	0	0	4.1874	13.5241	ITGB1;PGAM1;TMEM67
hsa-miR-3663-3p	1956-03-01	0.0395688	0.207358	0	0	4.1874	13.5241	CCT6A;YWHAB;TMTC3
hsa-miR-6719-3p	1956-03-01	0.0395688	0.207358	0	0	4.1874	13.5241	NCKAP1;FIGNL1;KDM6A
hsa-miR-5581-3p	1956-03-01	0.0395688	0.207358	0	0	4.1874	13.5241	RNF168;CSNK2A1;PRLR
hsa-miR-4796-3p	8/286	0.040222	0.210333	0	0	2.14482	6.89204	ITGB1;SMIM13;REST;RRM2;TUBB;AMD1;EIF4H;U2SURP
hsa-miR-892c-5p	1996-04-01	0.040679	0.211037	0	0	3.22215	10.3175	CCT6A;PLSCR1;RAB5C;UBE2V1
hsa-miR-4735-3p	1996-04-01	0.040679	0.211037	0	0	3.22215	10.3175	RAB5C;TWF1;FAM3C;AGFG1
hsa-miR-6728-3p	1996-04-01	0.040679	0.211037	0	0	3.22215	10.3175	NGRN;GPR89A;ALDOA;GPR89B
hsa-miR-4649-3p	12/504	0.0407636	0.211037	0	0	1.82585	5.84266	SLC30A6;SIKE1;CASP8;PLEKHB2;PSMC4;RSRC1;TPM3;TUBB;AMD1;ACOT2;EIF4H;THAP1
hsa-miR-4271	7/236	0.0409519	0.211037	0	0	2.27531	7.27042	CSNK2A1;MIER3;HDLBP;EIF4H;ARIH1;UBE2V1;SENP2
hsa-miR-3621	2024-02-01	0.0409564	0.211037	0	0	6.71059	21.442	SGMS1;CENPO
hsa-miR-4734	2024-02-01	0.0409564	0.211037	0	0	6.71059	21.442	HDLBP;SENP2
hsa-miR-222-3p	10/394	0.0412506	0.211815	0	0	1.94528	6.20174	NGRN;SON;PDXDC1;PSMC4;CAPRIN1;PKP2;HDLBP;RNPS1;RNF4;ACTG1
hsa-miR-581	1957-03-01	0.0413653	0.211815	0	0	4.10965	13.0905	G3BP2;UBXN7;RNF4
hsa-miR-2117	1957-03-01	0.0413653	0.211815	0	0	4.10965	13.0905	TGIF1;AKIRIN1;PIK3CB
hsa-let-7g-5p	9/341	0.0418291	0.21309	0	0	2.0226	6.42007	PRIM2;RRM2;MBD2;AMD1;POLR2D;TMTC3;PLEKHA3;ARIH1;EIF4G2
hsa-miR-301a-3p	10/395	0.0418429	0.21309	0	0	1.94013	6.15765	CCT6A;FXR1;PLEKHF2;NUS1;ATP6V0E1;CSNK2A1;UBE2D3;POLR2D;PEX13;SEC23B
hsa-miR-4433b-3p	1997-04-01	0.0419978	0.21309	0	0	3.18734	10.1043	MFSD14B;LMBRD2;AIDA;LSM3
hsa-miR-374b-3p	1997-04-01	0.0419978	0.21309	0	0	3.18734	10.1043	TGIF1;C3ORF38;SLC30A6;FEM1B
hsa-miR-4531	5/141	0.0420471	0.21309	0	0	2.7288	8.64749	OCLN;REST;SET;YWHAB;UBE2G1
hsa-miR-454-3p	10/396	0.0424409	0.2146	0	0	1.935	6.11392	CCT6A;FXR1;PLEKHF2;NUS1;ATP6V0E1;CSNK2A1;UBE2D3;POLR2D;PEX13;SEC23B
hsa-miR-129-5p	14/622	0.0425192	0.2146	0	0	1.72679	5.45287	ISY1;MCRS1;MEMO1;MAPK14;STRN3;THAP1;PLSCR1;LMBRD2;RBBP4;CAPRIN1;GNAQ;POLR2D;ACOT2;HNRNPA1L2
hsa-miR-4524b-5p	6/189	0.0429298	0.215652	0	0	2.43695	7.67198	C3ORF38;SLC30A6;PPM1A;RALGAPB;KIF5B;HNRNPA1L2
hsa-miR-4524a-5p	6/189	0.0429298	0.215652	0	0	2.43695	7.67198	C3ORF38;SLC30A6;PPM1A;RALGAPB;KIF5B;HNRNPA1L2
hsa-miR-943	1958-03-01	0.0432023	0.215652	0	0	4.03472	12.6765	EGLN1;GABPA;SRP9
hsa-miR-1202	1958-03-01	0.0432023	0.215652	0	0	4.03472	12.6765	RBBP4;BTBD1;ACTG1
hsa-miR-491-3p	1958-03-01	0.0432023	0.215652	0	0	4.03472	12.6765	SMIM13;DCUN1D1;TWF1
hsa-miR-5685	1998-04-01	0.0433405	0.215652	0	0	3.15327	9.89707	ISY1;TPM3;DYRK1A;DCUN1D1
hsa-miR-223-3p	1998-04-01	0.0433405	0.215652	0	0	3.15327	9.89707	ITGB1;CAPRIN1;TMEM67;TWF1
hsa-miR-130a-3p	10/398	0.0436546	0.216777	0	0	1.92483	6.0275	CCT6A;FXR1;PLEKHF2;NUS1;ATP6V0E1;CSNK2A1;UBE2D3;POLR2D;PEX13;SEC23B
hsa-miR-598-3p	2025-02-01	0.0441312	0.217826	0	0	6.4185	20.0295	CCT7;SCAMP1
mmu-miR-881-3p	2025-02-01	0.0441312	0.217826	0	0	6.4185	20.0295	SENP5;WDR43
hsa-miR-1273c	2025-02-01	0.0441312	0.217826	0	0	6.4185	20.0295	ARIH1;THAP1
hsa-miR-4252	11/455	0.044637	0.21848	0	0	1.85206	5.7584	KLF10;TGIF1;ISY1;RBBP4;RSRC1;TMEM67;PGM3;PLEKHA3;MAPK14;GABPB1;ALDOA
hsa-let-7f-2-3p	1999-04-01	0.0447072	0.21848	0	0	3.11992	9.69553	SET;PGK1;PGGT1B;DSG2
hsa-miR-4690-3p	1999-04-01	0.0447072	0.21848	0	0	3.11992	9.69553	ISY1;TPM3;DYRK1A;DCUN1D1
hsa-miR-670-5p	1999-04-01	0.0447072	0.21848	0	0	3.11992	9.69553	REST;CTBP2;G3BP2;HNRNPA1L2
hsa-miR-1825	1999-04-01	0.0447072	0.21848	0	0	3.11992	9.69553	KLF10;CSNK2A1;TSC22D1;CENPO
hsa-miR-454-5p	1959-03-01	0.0450795	0.219428	0	0	3.96247	12.281	RABL3;ALDOA;TMPO
hsa-miR-649	1959-03-01	0.0450795	0.219428	0	0	3.96247	12.281	NUS1;HNRNPK;HNRNPA1L2
hsa-miR-425-5p	5/144	0.0453266	0.220196	0	0	2.6695	8.25906	RNF168;RRM2;ARIH1;MAP2K6;CKS1B
hsa-miR-6834-5p	4/100	0.0460978	0.223028	0	0	3.08726	9.49948	TUBB;HS6ST1;MAP2K6;C16ORF87
hsa-miR-140-5p	4/100	0.0460978	0.223028	0	0	3.08726	9.49948	FXR1;ADAM9;ARIH1;AIDA
hsa-miR-661	11/458	0.0463993	0.223028	0	0	1.83934	5.64765	KLF10;HM13;FIGNL1;KIF5B;AMD1;POLR2D;PLEKHA3;GABPB1;ALDOA;AVL9;MCL1
hsa-miR-141-3p	5/145	0.0464528	0.223028	0	0	2.6503	8.1346	CTBP2;PGK1;YME1L1;MAPK14;MCL1
hsa-miR-4680-5p	5/145	0.0464528	0.223028	0	0	2.6503	8.1346	SLC30A6;PLSCR1;RBBP4;PAWR;MAPK14
mmu-miR-190a-5p	5/145	0.0464528	0.223028	0	0	2.6503	8.1346	MFSD14B;GCC2;STAMBP;FAM91A1;ATP2C1
hsa-miR-6779-3p	1960-03-01	0.0469966	0.225028	0	0	3.89276	11.9028	TPM3;ALDOA;SRP9
mmu-miR-568	2026-02-01	0.0473942	0.225028	0	0	6.15075	18.7552	NDUFAF4;MEMO1
hsa-miR-3148	7/244	0.0474978	0.225028	0	0	2.1976	6.69626	TGIF1;OCLN;SET;YWHAQ;TPM3;UBXN7;SCAMP1
hsa-miR-134-5p	4/101	0.0475123	0.225028	0	0	3.05528	9.30873	ITGB1;EGLN1;POT1;HSPD1
hsa-miR-1205	4/101	0.0475123	0.225028	0	0	3.05528	9.30873	MRS2;CSNK2A1;NUP35;UBE2G1
hsa-miR-4792	4/101	0.0475123	0.225028	0	0	3.05528	9.30873	AKIRIN1;MORF4L2;HS6ST1;C16ORF87
hsa-miR-548u	4/101	0.0475123	0.225028	0	0	3.05528	9.30873	PLEKHF2;SET;ANAPC7;KIF5B
hsa-miR-302b-3p	11/460	0.0476003	0.225028	0	0	1.83096	5.57512	ISY1;REST;SON;MFN1;WDR53;AVL9;GTF2H3;SEC23B;LSM3;LIN52;MCL1
hsa-miR-324-5p	8/297	0.048294	0.22787	0	0	2.06202	6.24884	RBBP4;TUBB;PGAM1;DYRK1A;PGK1;MEMO1;ALDOA;HSPD1
hsa-miR-183-5p	9/351	0.0486201	0.228357	0	0	1.96245	5.93389	ITGB1;DTYMK;PLEKHB2;CSNK2A1;WDR53;UBXN7;B3GNT2;PSEN1;AVL9
hsa-miR-6768-5p	5/147	0.0487549	0.228357	0	0	2.6127	7.89284	RRM2;TPM3;ACOT2;EIF4H;FAM3C
hsa-miR-8068	4/102	0.0489508	0.228357	0	0	3.02395	9.12308	RRM2;POT1;SLC3A2;SCAMP1
hsa-miR-6509-5p	1961-03-01	0.0489534	0.228357	0	0	3.82545	11.5409	CAPRIN1;PGM3;KDM6A
hsa-miR-103b	1961-03-01	0.0489534	0.228357	0	0	3.82545	11.5409	PPM1A;ZNF567;SRP9
hsa-miR-138-1-3p	1961-03-01	0.0489534	0.228357	0	0	3.82545	11.5409	CSNK2A1;TPM3;FEM1B
hsa-miR-7-5p	13/577	0.0491529	0.228854	0	0	1.72575	5.19938	DTYMK;NFYA;HDLBP;PIK3CB;ILF2;LSM3;FXR1;C3ORF38;MFSD14B;LSM12;ERI2;KIF5B;MATR3
hsa-miR-4311	6/196	0.0496517	0.23074	0	0	2.34633	7.04537	SON;YWHAQ;RNPS1;SLC3A2;AVL9;PHF6
hsa-miR-6828-5p	5/148	0.0499309	0.2316	0	0	2.5943	7.77542	NCKAP1;KIF5B;EIF4H;ARIH1;AIDA
hsa-miR-7161-5p	4/103	0.050413	0.232959	0	0	2.99325	8.94236	PLEKHF2;SET;ANAPC7;KIF5B
hsa-miR-548v	4/103	0.050413	0.232959	0	0	2.99325	8.94236	RNPS1;STAMBP;RNF4;HS6ST1
hsa-miR-8082	6/197	0.0506619	0.233168	0	0	2.33392	6.96112	MFSD14B;SET;RRM2;AVL9;ALDOA;THAP1
hsa-miR-302a-3p	11/465	0.0506951	0.233168	0	0	1.81033	5.39826	ISY1;REST;SON;MBD2;MFN1;WDR53;AVL9;GTF2H3;SEC23B;LSM3;LIN52
mmu-miR-374c-5p	2027-02-01	0.0507422	0.233168	0	0	5.90442	17.6011	SENP5;NDUFAF4
hsa-miR-3147	1962-03-01	0.0509496	0.233251	0	0	3.76042	11.1945	STAU1;KIF5B;CACYBP
hsa-miR-1273g-5p	1962-03-01	0.0509496	0.233251	0	0	3.76042	11.1945	FXR1;SGMS1;POLR2D
hsa-miR-137	5/149	0.0511234	0.233612	0	0	2.57615	7.66022	NCOA2;TMEM41A;BTBD1;CTBP1;RNF4
hsa-miR-1304-3p	12/523	0.051298	0.233976	0	0	1.75623	5.21617	DDB1;ISY1;NCKAP1;HM13;TMEM67;POLR2D;ACOT2;AIDA;ALDOA;SF3B1;SEC23B;STRN3
hsa-miR-4688	4/104	0.0518991	0.235562	0	0	2.96317	8.7664	TUBB;PGAM1;UBE2V1;ACTG1
hsa-miR-6743-5p	4/104	0.0518991	0.235562	0	0	2.96317	8.7664	TUBB;PGAM1;UBE2V1;ACTG1
hsa-miR-124-3p	27/1445	0.0520076	0.235562	0	0	1.44089	4.2598	PLEKHF2;ITGB1;TMEM41A;SGMS1;HDLBP;PHF6;FXR1;EEA1;LAMP2;PGGT1B;G3BP2;SLC39A3;RFC3;ATP6V0E1;ANAPC7;MAPK14;ILF2;SRP9;HIPK3;MFSD14A;MFSD14B;REST;CAPRIN1;SPRTN;B3GNT2;DSG2;SOS1
hsa-miR-8085	9/356	0.0522747	0.235562	0	0	1.93367	5.70674	NCKAP1;RBBP4;MIER3;YWHAB;TUBB;AMD1;UBE2V1;ARIH1;SENP2
hsa-miR-6731-5p	9/356	0.0522747	0.235562	0	0	1.93367	5.70674	NCKAP1;RBBP4;MIER3;YWHAB;TUBB;AMD1;UBE2V1;ARIH1;SENP2
hsa-miR-578	5/150	0.0523325	0.235562	0	0	2.55825	7.54721	PLSCR1;YWHAQ;FEM1B;G3BP2;UBXN7
hsa-miR-6878-5p	7/250	0.0528222	0.235562	0	0	2.14268	6.30125	NCKAP1;RBBP4;MIER3;YWHAB;PLEKHA3;UBE2V1;SENP2
hsa-miR-5585-5p	1963-03-01	0.0529848	0.235562	0	0	3.69756	10.8625	MIER3;AMD1;SPRTN
hsa-miR-3134	1963-03-01	0.0529848	0.235562	0	0	3.69756	10.8625	MFSD14B;SET;ALDOA
hsa-miR-362-5p	1963-03-01	0.0529848	0.235562	0	0	3.69756	10.8625	NOMO3;PRDX3;CASP8
hsa-miR-6776-3p	1963-03-01	0.0529848	0.235562	0	0	3.69756	10.8625	MORF4L2;ARIH1;HIPK3
hsa-miR-6866-5p	1963-03-01	0.0529848	0.235562	0	0	3.69756	10.8625	NCBP2;TUBB;UBE2G1
hsa-miR-331-5p	1963-03-01	0.0529848	0.235562	0	0	3.69756	10.8625	CAPRIN1;MBD2;PGM3
hsa-miR-606	1963-03-01	0.0529848	0.235562	0	0	3.69756	10.8625	TMEM87B;LAMP2;XRN2
hsa-miR-200a-3p	5/151	0.0535582	0.237683	0	0	2.5406	7.43631	G3BP2;PGK1;YME1L1;MAPK14;MCL1
mmu-miR-532-5p	2028-02-01	0.0541726	0.239546	0	0	5.67704	16.5519	TRUB1;GABPB1
mmu-miR-200c-3p	2028-02-01	0.0541726	0.239546	0	0	5.67704	16.5519	SENP5;MAPK14
hsa-miR-942-5p	6/201	0.0548281	0.241728	0	0	2.28558	6.6363	NCKAP1;CAPRIN1;UBE2D3;G3BP2;ALDOA;HNRNPA1L2
hsa-miR-514b-3p	1964-03-01	0.0550586	0.241728	0	0	3.63676	10.5443	LMBRD2;FEM1B;SRP9
hsa-miR-4705	1964-03-01	0.0550586	0.241728	0	0	3.63676	10.5443	NUS1;MIER3;PLEKHA3
hsa-miR-532-5p	1964-03-01	0.0550586	0.241728	0	0	3.63676	10.5443	MFSD14B;NCBP2;POLR2D
hsa-miR-6771-3p	7/253	0.0556196	0.243756	0	0	2.11623	6.11424	NCKAP1;OCLN;RSRC1;KIF5B;UBE2D3;UBQLN1;MCL1
hsa-miR-4525	5/153	0.0560594	0.245247	0	0	2.50601	7.22069	RSRC1;PLEKHA3;UBE2V1;ARIH1;SENP2
hsa-miR-373-3p	12/531	0.0562437	0.245618	0	0	1.72844	4.97454	ISY1;REST;SON;MBD2;MFN1;WDR53;ADAM9;AVL9;GTF2H3;SEC23B;LSM3;LIN52
hsa-miR-3174	4/107	0.0564997	0.246299	0	0	2.87642	8.26546	MFSD14A;SIKE1;SNRPA1;UBE2V1
hsa-miR-6757-5p	1965-03-01	0.0571708	0.247313	0	0	3.57792	10.239	HDLBP;EIF4H;MCL1
hsa-miR-6071	1965-03-01	0.0571708	0.247313	0	0	3.57792	10.239	GPR89A;GPR89B;HIPK3
hsa-miR-514a-3p	1965-03-01	0.0571708	0.247313	0	0	3.57792	10.239	LMBRD2;FEM1B;SRP9
hsa-miR-6861-5p	1965-03-01	0.0571708	0.247313	0	0	3.57792	10.239	TPM3;FEM1B;ALDOA
hsa-miR-5010-5p	5/154	0.0573349	0.247313	0	0	2.48907	7.11586	RSRC1;PLEKHA3;UBE2V1;ARIH1;SENP2
hsa-miR-4325	5/154	0.0573349	0.247313	0	0	2.48907	7.11586	YWHAB;KIF5B;AMD1;SOS1;RNF4
hsa-miR-4540	2029-02-01	0.0576825	0.247515	0	0	5.4665	15.5948	RALGAPB;PEX13
mmu-miR-503-5p	2029-02-01	0.0576825	0.247515	0	0	5.4665	15.5948	RNF168;GABPA
hsa-miR-4768-3p	14/651	0.0578123	0.247515	0	0	1.64568	4.6911	SLC30A6;ATP6V0E1;RRM2;CSNK2A1;TPM3;UBE2D3;LSM3;THAP1;OCLN;SIKE1;CASP8;PSMC4;ACOT2;FAM3C
hsa-miR-383-3p	10/419	0.0578424	0.247515	0	0	1.82402	5.19851	ATP6V0E1;PRPF6;RBBP4;CAPN7;TMEM67;GMPS;YME1L1;PLEKHA3;AVL9;STRN3
hsa-miR-3605-5p	4/108	0.0580805	0.247515	0	0	2.84862	8.10696	CSNK2A1;MORF4L2;PLEKHA3;KDM6A
hsa-miR-4693-3p	4/108	0.0580805	0.247515	0	0	2.84862	8.10696	LMBR1;UBE2G1;UBE2V1;CCT7
mmu-miR-1935	6/204	0.0580851	0.247515	0	0	2.2506	6.40487	TRUB1;TUBB;ACOT2;KNOP1;SLC3A2;CHMP5
hsa-miR-4534	6/205	0.0591961	0.249756	0	0	2.23918	6.32994	MFSD14B;SET;RRM2;AVL9;ALDOA;THAP1
hsa-miR-1285-5p	1966-03-01	0.0593209	0.249756	0	0	3.52095	9.94594	UBXN7;SEC23B;ASB3
hsa-miR-4507	1966-03-01	0.0593209	0.249756	0	0	3.52095	9.94594	ISY1;NFYA;HM13
hsa-miR-4652-5p	1966-03-01	0.0593209	0.249756	0	0	3.52095	9.94594	SON;PGAM1;UBE2V1
hsa-miR-5009-3p	1966-03-01	0.0593209	0.249756	0	0	3.52095	9.94594	CSNK2A1;MFN1;ARIH1
hsa-miR-4712-5p	1966-03-01	0.0593209	0.249756	0	0	3.52095	9.94594	NUP35;CCT7;PRLR
hsa-miR-2116-5p	1966-03-01	0.0593209	0.249756	0	0	3.52095	9.94594	LMBR1;CAPRIN1;STAMBP
mmu-miR-1198-5p	4/109	0.0596848	0.250859	0	0	2.82135	7.95247	SIKE1;CASP8;PGM3;GABPB1
hsa-miR-3190-3p	5/156	0.0599358	0.251485	0	0	2.45585	6.91195	OCLN;UBE2D3;EIF4H;LSM3;SRP9
hsa-miR-6746-5p	6/206	0.0603196	0.252665	0	0	2.22787	6.25608	SLC30A6;CASP8;PSMC4;TPM3;AVL9;THAP1
hsa-miR-7158-3p	5/157	0.061261	0.253762	0	0	2.43957	6.81277	SLC30A6;PLSCR1;RBBP4;MFN1;PAWR
mmu-miR-200b-3p	1930-02-01	0.0612691	0.253762	0	0	5.271	14.7192	SENP5;MAPK14
hsa-miR-100-3p	4/110	0.0613125	0.253762	0	0	2.79459	7.80185	NGRN;SON;CKS1B;C16ORF87
hsa-miR-6875-5p	4/110	0.0613125	0.253762	0	0	2.79459	7.80185	TUBB;PGAM1;HS6ST1;C16ORF87
hsa-miR-3126-5p	4/110	0.0613125	0.253762	0	0	2.79459	7.80185	TUBB;PGAM1;HS6ST1;C16ORF87
mmu-miR-692	4/110	0.0613125	0.253762	0	0	2.79459	7.80185	SGMS1;DSG2;GABPB1;PRLR
hsa-miR-513a-5p	6/207	0.0614559	0.253762	0	0	2.21667	6.18327	DYNC2LI1;AKIRIN1;MIER3;NCBP2;UBXN7;ALDOA
hsa-miR-4678	1967-03-01	0.0615087	0.253762	0	0	3.46575	9.66452	CAPRIN1;MBD2;TMTC3
hsa-miR-3132	1967-03-01	0.0615087	0.253762	0	0	3.46575	9.66452	SET;TPM3;FEM1B
hsa-miR-221-3p	9/368	0.0617674	0.254147	0	0	1.86788	5.20089	RAB5C;NFYA;ABHD3;YWHAB;MBD2;RNPS1;STAMBP;RNF4;ACTG1
hsa-miR-7847-3p	8/313	0.0618085	0.254147	0	0	1.95224	5.43448	TGIF1;SIKE1;REST;RAB5C;UBE2D3;AMD1;UBE2V1;ALDOA
hsa-miR-152-3p	5/158	0.0626029	0.255906	0	0	2.4235	6.71538	FXR1;CCT6A;CSNK2A1;YWHAB;UBE2D3
hsa-miR-383-5p	4/111	0.0629635	0.255906	0	0	2.76833	7.65499	PRDX3;NCKAP1;TPM3;TWF1
hsa-miR-4650-3p	4/111	0.0629635	0.255906	0	0	2.76833	7.65499	FXR1;TRUB1;ELMOD2;EIF4G2
hsa-miR-199b-5p	4/111	0.0629635	0.255906	0	0	2.76833	7.65499	SET;CSNK2A1;TSC22D1;CENPO
hsa-miR-4652-3p	4/111	0.0629635	0.255906	0	0	2.76833	7.65499	ATP6V0E1;ELMOD2;EIF4G2;SRP9
hsa-miR-5007-5p	4/111	0.0629635	0.255906	0	0	2.76833	7.65499	ISY1;KLF10;NUP35;ALDOA
hsa-miR-382-5p	4/111	0.0629635	0.255906	0	0	2.76833	7.65499	PPM1A;G3BP2;SF3B1;MRPS18C
hsa-miR-197-5p	1968-03-01	0.0637337	0.258184	0	0	3.41226	9.3941	SET;TPM3;FEM1B
hsa-miR-3940-5p	1968-03-01	0.0637337	0.258184	0	0	3.41226	9.3941	ISY1;NFYA;HM13
hsa-miR-7977	14/662	0.0644873	0.260808	0	0	1.61681	4.43214	ATP6V0E1;TPM3;GMPS;PLEKHA3;STRN3;THAP1;PRPF6;RBBP4;PSMC4;CAPN7;TMEM67;YME1L1;ALDOA;AVL9
hsa-miR-6836-3p	6/210	0.0649405	0.26221	0	0	2.18374	5.97097	ACOT2;DYRK1A;UBXN7;ALDOA;MAPK14;MCL1
hsa-miR-1200	5/160	0.0653361	0.263376	0	0	2.39198	6.52584	NCKAP1;SET;CTBP1;PSMC1;GABPA
hsa-miR-26b-5p	33/1872	0.0654682	0.263477	0	0	1.36044	3.70882	MRPS34;TMTC3;SLC3A2;MAT2B;RPL6;HSPD1;DYNC2LI1;BCLAF1;CASP8;ERI2;G3BP2;FBXO3;CCT7;RAE1;MAP4K3;MCL1;NUS1;SMAD1;AKIRIN1;TPM3;DYRK1A;NUP153;ARMC8;SRP9;LSM3;PSMC4;PSMC1;RABL3;ADAM9;MATR3;CHMP6;EIF4G2;ANAPC1
hsa-miR-6845-3p	7/263	0.0656017	0.263584	0	0	2.03252	5.53689	TRUB1;CSNK2A1;NFYA;CAPRIN1;PGK1;ALDOA;HNRNPA1L2
mmu-miR-363-5p	1969-03-01	0.0659955	0.264304	0	0	3.36039	9.13411	SENP5;KNOP1;SLC3A2
hsa-miR-6882-5p	1969-03-01	0.0659955	0.264304	0	0	3.36039	9.13411	PLEKHF2;AKIRIN1;ACP1
hsa-miR-1260a	5/161	0.0667275	0.266369	0	0	2.37653	6.4336	C3ORF38;TMEM41A;CSNK2A1;CAPN7;ARL6IP6
hsa-miR-1275	5/161	0.0667275	0.266369	0	0	2.37653	6.4336	RSRC1;PLEKHA3;UBE2V1;ARIH1;SENP2
hsa-miR-4307	4/114	0.0680558	0.26972	0	0	2.69242	7.23568	SLC39A9;FEM1B;PAWR;GTF2H3
hsa-miR-6847-5p	5/162	0.0681353	0.26972	0	0	2.36127	6.34299	DDB1;CTBP2;TPM3;MORF4L2;UBE2V1
hsa-miR-4665-5p	5/162	0.0681353	0.26972	0	0	2.36127	6.34299	RSRC1;PLEKHA3;UBE2V1;ARIH1;SENP2
hsa-miR-7151-5p	1970-03-01	0.0682937	0.26972	0	0	3.31007	8.88401	DYRK1A;SPRTN;ZNF567
hsa-miR-6126	1970-03-01	0.0682937	0.26972	0	0	3.31007	8.88401	ITGB1;UBE2D3;C17ORF80
hsa-miR-5000-5p	1970-03-01	0.0682937	0.26972	0	0	3.31007	8.88401	CASP8;PSEN1;MCL1
hsa-miR-148a-3p	6/213	0.0685389	0.26972	0	0	2.15176	5.76748	FXR1;CCT6A;CSNK2A1;YWHAB;UBE2D3;DYRK1A
mmu-miR-199a-5p	1932-02-01	0.0686619	0.26972	0	0	4.9191	13.1761	PDXDC1;DSG2
mmu-miR-1958	1932-02-01	0.0686619	0.26972	0	0	4.9191	13.1761	UBR1;CHMP5
hsa-miR-6881-5p	1932-02-01	0.0686619	0.26972	0	0	4.9191	13.1761	UBXN7;RNPS1
hsa-miR-4701-3p	5/163	0.0695595	0.271589	0	0	2.34621	6.25398	AMD1;RNPS1;GABPB1;ALDOA;HS6ST1
hsa-miR-5696	5/163	0.0695595	0.271589	0	0	2.34621	6.25398	ARFGEF2;RBBP4;RSRC1;MAPK14;ARL6IP6
hsa-miR-6736-5p	5/163	0.0695595	0.271589	0	0	2.34621	6.25398	AMD1;RNPS1;GABPB1;ALDOA;HS6ST1
hsa-miR-122-5p	13/610	0.0696862	0.271589	0	0	1.62755	4.3354	PSMD10;SET;YWHAB;HM13;ADAM10;MFSD14B;POLR2D;RABL3;YME1L1;ALDOA;SEC23B;FBXO7;LIN52
hsa-miR-4797-5p	6/214	0.0697637	0.271589	0	0	2.14131	5.70153	ISY1;KLF10;SET;MEMO1;ALDOA;THAP1
hsa-miR-4293	4/115	0.0697993	0.271589	0	0	2.66803	7.10264	OCLN;TUBB;ARL6IP6;MCL1
hsa-miR-4760-3p	1971-03-01	0.070628	0.273517	0	0	3.26122	8.64331	DYNC2LI1;HIPK3;ARL6IP6
hsa-miR-4433a-5p	1971-03-01	0.070628	0.273517	0	0	3.26122	8.64331	RSRC1;PGK1;UBE2V1
hsa-miR-589-5p	1971-03-01	0.070628	0.273517	0	0	3.26122	8.64331	IPPK;PGAM1;PLEKHA3
hsa-miR-411-5p	6/215	0.0710011	0.27453	0	0	2.13095	5.63649	ELMOD2;RABL3;GTF2H3;EIF4G2;THAP1;MAP2K6
hsa-miR-1257	4/116	0.0715656	0.276257	0	0	2.64407	6.97279	SMIM13;AKIRIN1;UBE2D3;SPRTN
hsa-miR-6832-5p	7/269	0.0720796	0.276257	0	0	1.98536	5.22146	SET;TPM3;NCBP2;RABL3;GTF2H3;THAP1;MAP2K6
hsa-miR-4698	6/216	0.0722511	0.276257	0	0	2.1207	5.57235	PRDX3;LMBR1;FEM1B;ELMOD2;G3BP2;LSM3
hsa-miR-1262	5/165	0.0724572	0.276257	0	0	2.31664	6.08063	AMD1;RNPS1;GABPB1;ALDOA;HS6ST1
hsa-miR-520d-5p	5/165	0.0724572	0.276257	0	0	2.31664	6.08063	TSNAX;BCLAF1;SGMS1;RNPS1;ARIH1
mmu-miR-338-5p	1933-02-01	0.0724629	0.276257	0	0	4.76018	12.4939	ADAM9;DCK
hsa-miR-4521	1933-02-01	0.0724629	0.276257	0	0	4.76018	12.4939	ITGB1;UBE2G1
hsa-miR-5092	1933-02-01	0.0724629	0.276257	0	0	4.76018	12.4939	RBBP4;EIF4H
hsa-miR-4453	1972-03-01	0.0729979	0.276257	0	0	3.2138	8.41155	TUBB;UBE2D3;THAP1
hsa-miR-5100	1972-03-01	0.0729979	0.276257	0	0	3.2138	8.41155	CCT6A;MATR3;ARL6IP6
mmu-miR-1971	1972-03-01	0.0729979	0.276257	0	0	3.2138	8.41155	KIF5B;TCEA1;GABPB1
mmu-miR-1981-5p	1972-03-01	0.0729979	0.276257	0	0	3.2138	8.41155	KIF5B;TCEA1;GABPB1
hsa-miR-4538	1972-03-01	0.0729979	0.276257	0	0	3.2138	8.41155	TUBB;UBE2D3;THAP1
mmu-miR-3470b	4/117	0.0733546	0.276257	0	0	2.62054	6.84602	RNF168;TCEA1;AIDA;GABPB1
hsa-miR-3925-5p	4/117	0.0733546	0.276257	0	0	2.62054	6.84602	WDR1;G3BP2;AVL9;ACTG1
hsa-miR-1185-1-3p	4/117	0.0733546	0.276257	0	0	2.62054	6.84602	SET;PGK1;PGGT1B;DSG2
hsa-miR-3944-5p	4/117	0.0733546	0.276257	0	0	2.62054	6.84602	PGAM1;DYRK1A;G3BP2;MEMO1
hsa-miR-593-3p	5/166	0.0739306	0.278002	0	0	2.30214	5.99621	NCKAP1;TPM3;AMD1;UBXN7;STRN3
hsa-miR-4438	8/326	0.0743779	0.278832	0	0	1.87118	4.86243	ISY1;LAMP2;GMPS;WDR53;UBE2V1;GTF2H3;LSM3;EIF4G2
mmu-miR-129-5p	8/326	0.0743779	0.278832	0	0	1.87118	4.86243	LSM12;SGMS1;CTBP2;TPM3;ACOT2;G3BP2;GABPB1;TMPO
hsa-miR-6754-5p	6/218	0.074789	0.278855	0	0	2.10047	5.4467	ISY1;PGAM1;AMD1;NUP35;C16ORF87;MCL1
hsa-miR-545-5p	4/118	0.0751663	0.278855	0	0	2.59742	6.72226	MORC3;AKIRIN1;PLEKHA3;MCL1
hsa-miR-5589-3p	4/118	0.0751663	0.278855	0	0	2.59742	6.72226	PLEKHB2;GNAQ;TWF1;DSG2
hsa-miR-300	4/118	0.0751663	0.278855	0	0	2.59742	6.72226	KLF10;SGMS1;DSG2;ACP1
hsa-miR-6884-3p	1973-03-01	0.0754029	0.278855	0	0	3.16772	8.18828	NEDD1;ZNF567;HIPK3
hsa-miR-568	1973-03-01	0.0754029	0.278855	0	0	3.16772	8.18828	AKIRIN1;MIER3;B3GNT2
hsa-miR-7114-5p	1973-03-01	0.0754029	0.278855	0	0	3.16772	8.18828	EIF4H;ALDOA;SRP9
hsa-miR-411-3p	1973-03-01	0.0754029	0.278855	0	0	3.16772	8.18828	FXR1;SIKE1;SGMS1
hsa-miR-8070	1973-03-01	0.0754029	0.278855	0	0	3.16772	8.18828	SMIM13;SON;RBBP4
mmu-miR-298-5p	6/219	0.0760768	0.279764	0	0	2.09051	5.38517	TRUB1;SENP5;TUBB;ACOT2;KNOP1;SLC3A2
hsa-miR-378f	1934-02-01	0.0763303	0.279764	0	0	4.61119	11.8631	REST;HIPK3
hsa-miR-378e	1934-02-01	0.0763303	0.279764	0	0	4.61119	11.8631	REST;HIPK3
hsa-miR-378d	1934-02-01	0.0763303	0.279764	0	0	4.61119	11.8631	REST;HIPK3
hsa-miR-378i	1934-02-01	0.0763303	0.279764	0	0	4.61119	11.8631	REST;HIPK3
hsa-miR-378h	1934-02-01	0.0763303	0.279764	0	0	4.61119	11.8631	REST;HIPK3
hsa-miR-378a-5p	9/385	0.0769954	0.28055	0	0	1.78186	4.56871	PLSCR1;SET;RBBP4;YWHAB;PSMC1;HM13;UBA5;ALDOA;GABPA
hsa-miR-3616-5p	4/119	0.0770004	0.28055	0	0	2.5747	6.60139	PLEKHB2;BTBD1;PGGT1B;PEX13
hsa-miR-211-3p	4/119	0.0770004	0.28055	0	0	2.5747	6.60139	IPPK;ISY1;SET;MCL1
hsa-miR-4496	4/119	0.0770004	0.28055	0	0	2.5747	6.60139	YWHAQ;KIF5B;PGM3;PRLR
hsa-miR-518c-5p	1974-03-01	0.0778427	0.282264	0	0	3.12295	7.97309	AVL9;PRLR;HNRNPA1L2
hsa-miR-502-3p	1974-03-01	0.0778427	0.282264	0	0	3.12295	7.97309	SMIM13;SET;PLEKHB2
hsa-miR-3178	1974-03-01	0.0778427	0.282264	0	0	3.12295	7.97309	ATP6V0E1;WDR1;YME1L1
mmu-miR-190b-5p	2023-06-01	0.0780438	0.282264	0	0	14.7209	37.5454	FAM91A1
mmu-miR-708-5p	2023-06-01	0.0780438	0.282264	0	0	14.7209	37.5454	PRLR
hsa-miR-6771-5p	5/169	0.0784481	0.282714	0	0	2.25968	5.7516	SLC30A6;CASP8;TPM3;PSMC4;THAP1
hsa-miR-6878-3p	5/169	0.0784481	0.282714	0	0	2.25968	5.7516	PLSCR1;TMEM67;PGK1;CACYBP;GTF2H3
hsa-miR-6734-3p	6/221	0.0786902	0.282714	0	0	2.07085	5.26458	CSNK2A1;CTBP2;RBBP4;CAPRIN1;G3BP2;ALDOA
hsa-miR-1296-5p	4/120	0.0788569	0.282714	0	0	2.55237	6.48334	KIF5B;CAPRIN1;RNPS1;TMPO
hsa-miR-1185-2-3p	4/120	0.0788569	0.282714	0	0	2.55237	6.48334	SET;PGK1;PGGT1B;DSG2
mmu-miR-511-3p	4/120	0.0788569	0.282714	0	0	2.55237	6.48334	SIKE1;CASP8;PGM3;GABPB1
hsa-miR-6850-3p	1935-02-01	0.0802616	0.283817	0	0	4.47123	11.2785	PLEKHA3;ALDOA
hsa-miR-4787-5p	1935-02-01	0.0802616	0.283817	0	0	4.47123	11.2785	CENPO;ALDOA
hsa-miR-378b	1935-02-01	0.0802616	0.283817	0	0	4.47123	11.2785	REST;HIPK3
hsa-miR-6861-3p	1935-02-01	0.0802616	0.283817	0	0	4.47123	11.2785	AKIRIN1;HDLBP
hsa-miR-1290	1975-03-01	0.0803168	0.283817	0	0	3.07942	7.7656	PRDX3;STAU1;HM13
hsa-miR-323a-3p	1975-03-01	0.0803168	0.283817	0	0	3.07942	7.7656	TRUB1;TSNAX;LIN52
hsa-miR-6508-5p	1975-03-01	0.0803168	0.283817	0	0	3.07942	7.7656	AMD1;NUP35;MCL1
hsa-miR-7844-5p	1975-03-01	0.0803168	0.283817	0	0	3.07942	7.7656	REST;PGM3;GABPA
hsa-miR-489-3p	1975-03-01	0.0803168	0.283817	0	0	3.07942	7.7656	NCKAP1;FEM1B;SNRPA1
hsa-miR-5007-3p	1975-03-01	0.0803168	0.283817	0	0	3.07942	7.7656	SMIM13;TMEM67;SCAMP1
hsa-miR-3653-5p	13/625	0.0806493	0.284583	0	0	1.58642	3.99403	NCKAP1;AKIRIN1;HM13;UBA5;CKS1B;THAP1;PLSCR1;RBBP4;RABL3;ALDOA;SF3B1;HNRNPA1L2;ANAPC1
hsa-miR-6744-3p	5/171	0.0815407	0.286391	0	0	2.23222	5.59541	PLSCR1;TMEM67;PGK1;CACYBP;GTF2H3
hsa-miR-4757-5p	5/171	0.0815407	0.286391	0	0	2.23222	5.59541	PLSCR1;TMEM67;PGK1;CACYBP;GTF2H3
hsa-miR-4294	5/171	0.0815407	0.286391	0	0	2.23222	5.59541	RBBP4;TPM3;MAPK14;THAP1;STRN3
mmu-miR-1195	8/333	0.0817429	0.286391	0	0	1.83022	4.58318	TRUB1;SENP5;TUBB;KNOP1;SLC3A2;PEX13;EIF4G2;SPG21
mmu-let-7b-5p	8/333	0.0817429	0.286391	0	0	1.83022	4.58318	EEA1;GTF3C2;CSNK2A1;KNOP1;NUP35;MAP4K3;EIF4G2;ACTG1
hsa-miR-302e	10/448	0.0819492	0.286706	0	0	1.70069	4.25455	ISY1;REST;SON;MFN1;WDR53;AVL9;GTF2H3;SEC23B;LSM3;LIN52
hsa-miR-5694	4/122	0.0826364	0.2871	0	0	2.50886	6.25535	KLF10;RAB5C;TWF1;GABPB1
hsa-miR-4732-3p	1976-03-01	0.0828247	0.2871	0	0	3.03708	7.56545	NCKAP1;REST;HS6ST1
hsa-miR-4778-5p	1976-03-01	0.0828247	0.2871	0	0	3.03708	7.56545	ATP6V0E1;ELMOD2;GMPS
hsa-miR-520d-3p	10/449	0.0828763	0.2871	0	0	1.69673	4.22555	ISY1;REST;SON;MFN1;WDR53;AVL9;GTF2H3;SEC23B;LSM3;LIN52
hsa-miR-4770	5/172	0.083111	0.2871	0	0	2.21874	5.5193	NCKAP1;ATP6V0E1;MIER3;YWHAB;THAP1
mmu-miR-3110-5p	5/172	0.083111	0.2871	0	0	2.21874	5.5193	RNF168;KIF5B;TCEA1;AIDA;GABPB1
hsa-miR-6088	5/172	0.083111	0.2871	0	0	2.21874	5.5193	NCKAP1;ATP6V0E1;MIER3;YWHAB;THAP1
hsa-miR-524-5p	5/172	0.083111	0.2871	0	0	2.21874	5.5193	TSNAX;BCLAF1;SGMS1;RNPS1;ARIH1
hsa-miR-203b-3p	5/172	0.083111	0.2871	0	0	2.21874	5.5193	SLC30A6;PLSCR1;RBBP4;ERI2;PAWR
hsa-miR-588	6/225	0.084067	0.28822	0	0	2.03261	5.03302	ISY1;RBBP4;GMPS;PGM3;YME1L1;THAP1
hsa-miR-6770-5p	6/225	0.084067	0.28822	0	0	2.03261	5.03302	TGIF1;CSNK2A1;CTBP1;TUBB;UBE2G1;SENP2
hsa-miR-651-3p	6/225	0.084067	0.28822	0	0	2.03261	5.03302	NUS1;ATP6V0E1;YWHAQ;EIF4H;ARIH1;PRELID3B
hsa-miR-6843-3p	6/225	0.084067	0.28822	0	0	2.03261	5.03302	KLF10;TPM3;UBA5;HM13;YME1L1;ALDOA
hsa-miR-6848-3p	6/225	0.084067	0.28822	0	0	2.03261	5.03302	KLF10;TPM3;UBA5;HM13;YME1L1;ALDOA
hsa-miR-6831-3p	1936-02-01	0.0842544	0.28822	0	0	4.3395	10.7356	MAPK14;THAP1
hsa-miR-374c-3p	1936-02-01	0.0842544	0.28822	0	0	4.3395	10.7356	ALDOA;ARL6IP6
hsa-miR-4795-3p	4/123	0.0845591	0.288461	0	0	2.48765	6.14525	SON;BTBD1;MBD2;SCAMP1
hsa-miR-573	4/123	0.0845591	0.288461	0	0	2.48765	6.14525	PLEKHB2;BTBD1;PGGT1B;PEX13
hsa-miR-3149	5/173	0.0846973	0.288533	0	0	2.20542	5.44447	MIER3;RABL3;POT1;THAP1;MAP2K6
hsa-miR-6131	6/226	0.0854423	0.290669	0	0	2.02326	4.97705	RBBP4;FEM1B;UBA5;YME1L1;ALDOA;LIN52
hsa-miR-3665	5/174	0.0862996	0.29318	0	0	2.19226	5.37089	RAB5C;PGAM1;MEMO1;AIDA;LSM3
hsa-miR-1972	4/124	0.0865036	0.293469	0	0	2.46679	6.03764	NCKAP1;TMEM237;HM13;AVL9
hsa-miR-520e	10/453	0.0866488	0.293557	0	0	1.68106	4.1117	ISY1;REST;SON;MFN1;WDR53;AVL9;GTF2H3;SEC23B;LSM3;LIN52
hsa-miR-143-3p	6/228	0.0882303	0.297216	0	0	2.00483	4.86734	ITGB1;NCKAP1;ATP6V0E1;MIER3;YWHAB;THAP1
hsa-miR-668-3p	1937-02-01	0.0883064	0.297216	0	0	4.2153	10.2303	MAPK14;HNRNPA1L2
mmu-miR-494-3p	1937-02-01	0.0883064	0.297216	0	0	4.2153	10.2303	LSM12;PEX13
mmu-miR-539-3p	1937-02-01	0.0883064	0.297216	0	0	4.2153	10.2303	CASP8;B3GNT2
hsa-miR-520a-3p	10/455	0.0885737	0.297216	0	0	1.67333	4.05603	ISY1;REST;SON;MFN1;WDR53;AVL9;GTF2H3;SEC23B;LSM3;LIN52
hsa-miR-520c-3p	10/455	0.0885737	0.297216	0	0	1.67333	4.05603	ISY1;REST;SON;MFN1;WDR53;AVL9;GTF2H3;SEC23B;LSM3;LIN52
hsa-miR-520b	10/455	0.0885737	0.297216	0	0	1.67333	4.05603	ISY1;REST;SON;MFN1;WDR53;AVL9;GTF2H3;SEC23B;LSM3;LIN52
hsa-miR-542-3p	5/176	0.0895516	0.300089	0	0	2.1664	5.2274	YWHAB;PGAM1;AMD1;GABPB1;ALDOA
hsa-miR-3181	2023-07-01	0.0904478	0.30067	0	0	12.2668	29.4769	FAM3C
mmu-miR-767	2023-07-01	0.0904478	0.30067	0	0	12.2668	29.4769	MCL1
mmu-miR-380-5p	2023-07-01	0.0904478	0.30067	0	0	12.2668	29.4769	YME1L1
mmu-miR-146a-3p	2023-07-01	0.0904478	0.30067	0	0	12.2668	29.4769	TGIF1
hsa-miR-6752-3p	4/126	0.0904574	0.30067	0	0	2.42611	5.82963	RALGAPB;HDLBP;G3BP2;HNRNPA1L2
hsa-miR-192-3p	4/126	0.0904574	0.30067	0	0	2.42611	5.82963	FXR1;SLC39A9;CTBP1;PLEKHA3
hsa-miR-3190-5p	7/285	0.0911458	0.30255	0	0	1.86956	4.47814	ANAPC7;TPM3;KIF5B;AMD1;ACOT2;PGM3;LSM3
mmu-miR-181a-5p	10/458	0.0915092	0.303033	0	0	1.66187	3.97405	TMEM87B;CTBP1;IDH1;GNAQ;ADAM9;SCAMP1;SOS1;SF3B1;AGFG1;MCL1
hsa-miR-3163	8/342	0.0918261	0.303033	0	0	1.78007	4.25056	PRDX3;TGIF1;IPPK;NCKAP1;SON;CSNK2A1;TPM3;RNPS1
hsa-miR-3117-3p	1938-02-01	0.0924152	0.303033	0	0	4.098	9.75925	SMAD1;CAPRIN1
hsa-miR-6821-5p	1938-02-01	0.0924152	0.303033	0	0	4.098	9.75925	ISY1;GMPS
mmu-miR-381-3p	1938-02-01	0.0924152	0.303033	0	0	4.098	9.75925	CASP8;B3GNT2
hsa-miR-4305	1938-02-01	0.0924152	0.303033	0	0	4.098	9.75925	OCLN;EIF4H
hsa-miR-4689	4/127	0.0924664	0.303033	0	0	2.40626	5.72908	PLSCR1;TSC22D1;UBE2V1;KDM6A
hsa-miR-6867-5p	10/459	0.0925005	0.303033	0	0	1.65808	3.94713	EEA1;PLSCR1;LMBR1;RALGAPB;SON;AMD1;TMTC3;POT1;HPS3;ACTG1
hsa-miR-6083	5/178	0.0928665	0.303033	0	0	2.14114	5.08861	SMIM13;SIKE1;REST;RRM2;FEM1B
hsa-miR-4700-3p	1980-03-01	0.0931857	0.303033	0	0	2.87872	6.83167	RRM2;MORF4L2;SCAMP1
hsa-miR-6715a-3p	1980-03-01	0.0931857	0.303033	0	0	2.87872	6.83167	TPM3;CAPRIN1;SOS1
hsa-miR-6504-5p	1980-03-01	0.0931857	0.303033	0	0	2.87872	6.83167	RRM2;CENPO;HNRNPA1L2
hsa-miR-1912	1980-03-01	0.0931857	0.303033	0	0	2.87872	6.83167	SON;TPM3;PLEKHA3
mmu-miR-694	1980-03-01	0.0931857	0.303033	0	0	2.87872	6.83167	SENP5;GNAQ;C16ORF87
hsa-miR-3152-5p	1980-03-01	0.0931857	0.303033	0	0	2.87872	6.83167	SET;DYRK1A;MAPK14
hsa-miR-7151-3p	9/401	0.0932599	0.303033	0	0	1.70772	4.05134	ISY1;DDX47;LAMP2;GMPS;WDR53;RNPS1;GTF2H3;LSM3;EIF4G2
hsa-miR-302d-3p	10/460	0.0934983	0.303408	0	0	1.65431	3.92041	ISY1;REST;SON;MFN1;WDR53;AVL9;GTF2H3;SEC23B;LSM3;LIN52
hsa-miR-181d-5p	7/287	0.0937111	0.303698	0	0	1.85601	4.39418	TUBB;PGAM1;ZFAND6;G3BP2;CENPO;FAM3C;PDIA6
hsa-miR-5095	9/402	0.0943387	0.304406	0	0	1.70329	4.02123	ISY1;DDX47;LAMP2;GMPS;WDR53;RNPS1;GTF2H3;LSM3;EIF4G2
hsa-miR-342-5p	4/128	0.0944966	0.304406	0	0	2.38673	5.63076	BCLAF1;RAB5C;PSMC1;RNPS1
hsa-miR-95-5p	4/128	0.0944966	0.304406	0	0	2.38673	5.63076	NCKAP1;PAWR;B3GNT2;ZNF567
hsa-miR-372-3p	10/461	0.0945025	0.304406	0	0	1.65056	3.89388	ISY1;REST;SON;MFN1;WDR53;AVL9;GTF2H3;SEC23B;LSM3;LIN52
mmu-miR-5125	5/179	0.0945474	0.304406	0	0	2.12872	5.02092	RNF168;KIF5B;TCEA1;AIDA;GABPB1
hsa-miR-1226-5p	1981-03-01	0.0958559	0.305749	0	0	2.84167	6.66346	HS6ST1;ANAPC1;MAP2K6
hsa-miR-337-3p	1981-03-01	0.0958559	0.305749	0	0	2.84167	6.66346	FXR1;CSNK2A1;MBD2
hsa-miR-1295b-5p	1981-03-01	0.0958559	0.305749	0	0	2.84167	6.66346	SON;TPM3;PLEKHA3
hsa-miR-382-3p	1981-03-01	0.0958559	0.305749	0	0	2.84167	6.66346	IPPK;SLC30A6;CAPN7
hsa-miR-345-3p	1981-03-01	0.0958559	0.305749	0	0	2.84167	6.66346	REST;UBE2G1;THAP1
hsa-miR-3064-5p	1981-03-01	0.0958559	0.305749	0	0	2.84167	6.66346	RRM2;CENPO;HNRNPA1L2
hsa-miR-520g-3p	9/404	0.0965182	0.305749	0	0	1.69449	3.96176	KLF10;FXR1;ISY1;ATP6V0E1;WDR53;GTF2H3;HIPK3;LSM3;TMPO
hsa-miR-10a-5p	10/463	0.0965302	0.305749	0	0	1.6431	3.8414	GTF3C2;PLSCR1;SON;PLEKHB2;CSNK2A1;FEM1B;EIF4H;UBXN7;SLC3A2;ACTG1
hsa-miR-3165	4/129	0.0965477	0.305749	0	0	2.36752	5.53459	CAPN7;DYRK1A;YME1L1;UBE2V1
hsa-miR-378c	1939-02-01	0.0965786	0.305749	0	0	3.98704	9.31931	REST;HIPK3
hsa-miR-1909-5p	1939-02-01	0.0965786	0.305749	0	0	3.98704	9.31931	YWHAB;TWF1
hsa-miR-604	1939-02-01	0.0965786	0.305749	0	0	3.98704	9.31931	UBE2V1;SENP2
hsa-miR-6731-3p	1939-02-01	0.0965786	0.305749	0	0	3.98704	9.31931	PLSCR1;GABPA
hsa-miR-181c-5p	7/290	0.0976342	0.308695	0	0	1.83605	4.27163	SGMS1;TUBB;ZFAND6;G3BP2;CENPO;FAM3C;PDIA6
hsa-miR-6124	5/181	0.0979557	0.309034	0	0	2.10432	4.88883	OCLN;YWHAQ;TPM3;KIF5B;UBXN7
hsa-miR-877-5p	6/235	0.0983753	0.309034	0	0	1.94285	4.5054	STAU1;DDX47;NCBP2;TUBB;FBXO7;ACTG1
hsa-miR-339-5p	6/235	0.0983753	0.309034	0	0	1.94285	4.5054	CTBP2;TCTN3;TPM3;G3BP2;UBXN7;HNRNPA1L2
hsa-miR-181a-2-3p	1982-03-01	0.0985572	0.309034	0	0	2.80556	6.50081	MIER3;PGK1;MAPK14
hsa-miR-6739-3p	1982-03-01	0.0985572	0.309034	0	0	2.80556	6.50081	SET;SON;STAMBP
hsa-miR-552-5p	4/130	0.0986197	0.309034	0	0	2.34861	5.44051	NUS1;NFYA;ARIH1;SCAMP1
hsa-miR-3915	4/130	0.0986197	0.309034	0	0	2.34861	5.44051	PLSCR1;MIER3;UBE2V1;KDM6A
hsa-miR-520h	9/407	0.0998421	0.312167	0	0	1.68146	3.87435	KLF10;FXR1;ISY1;ATP6V0E1;WDR53;GTF2H3;HIPK3;LSM3;TMPO
hsa-miR-744-3p	6/236	0.0998733	0.312167	0	0	1.9343	4.45635	CASP8;RBBP4;YWHAB;NCBP2;POLR2D;MAPK14
mmu-miR-3089-5p	8/349	0.100143	0.312614	0	0	1.7429	4.01069	TRUB1;SENP5;TUBB;KNOP1;SLC3A2;PEX13;EIF4G2;SPG21
hsa-miR-328-3p	4/131	0.100712	0.312625	0	0	2.33	5.34847	RALGAPB;HNRNPK;YWHAQ;SLC25A40
hsa-miR-6858-5p	4/131	0.100712	0.312625	0	0	2.33	5.34847	PLSCR1;TSC22D1;UBE2V1;KDM6A
hsa-miR-182-3p	1940-02-01	0.100794	0.312625	0	0	3.88192	8.90774	STAMBP;ACTG1
mmu-miR-1912-3p	1940-02-01	0.100794	0.312625	0	0	3.88192	8.90774	SGMS1;CAPRIN1
mmu-miR-1903	1940-02-01	0.100794	0.312625	0	0	3.88192	8.90774	ZNF567;PRLR
hsa-miR-4255	1983-03-01	0.101289	0.312625	0	0	2.77035	6.34348	MFSD14A;AKIRIN1;KIF5B
hsa-miR-6729-3p	1983-03-01	0.101289	0.312625	0	0	2.77035	6.34348	RABL3;G3BP2;CENPO
hsa-miR-3529-5p	1983-03-01	0.101289	0.312625	0	0	2.77035	6.34348	TRUB1;ELMOD2;SF3B1
hsa-miR-21-3p	1983-03-01	0.101289	0.312625	0	0	2.77035	6.34348	SMAD1;SON;MAT2B
mmu-miR-344g-3p	2023-08-01	0.102686	0.313296	0	0	10.5139	23.9304	GABPA
hsa-miR-6825-3p	2023-08-01	0.102686	0.313296	0	0	10.5139	23.9304	AKIRIN1
mmu-miR-490-5p	2023-08-01	0.102686	0.313296	0	0	10.5139	23.9304	FEM1B
mmu-miR-5134-5p	2023-08-01	0.102686	0.313296	0	0	10.5139	23.9304	CHMP5
hsa-miR-4750-5p	2023-08-01	0.102686	0.313296	0	0	10.5139	23.9304	FAM3C
mmu-miR-28a-5p	2023-08-01	0.102686	0.313296	0	0	10.5139	23.9304	PRLR
hsa-miR-3677-3p	2023-08-01	0.102686	0.313296	0	0	10.5139	23.9304	RAB5C
mmu-miR-466b-3p	4/132	0.102825	0.313296	0	0	2.31167	5.25842	CASP8;CCDC138;B3GNT2;GABPB1
mmu-miR-466c-3p	4/132	0.102825	0.313296	0	0	2.31167	5.25842	CASP8;CCDC138;B3GNT2;GABPB1
mmu-miR-466p-3p	4/132	0.102825	0.313296	0	0	2.31167	5.25842	CASP8;CCDC138;B3GNT2;GABPB1
hsa-miR-145-5p	6/238	0.102905	0.313296	0	0	1.91743	4.36013	SET;TPM3;RBM18;FAM3C;MEST;MAP2K6
hsa-miR-5586-3p	5/184	0.103183	0.313367	0	0	2.06873	4.69861	KLF10;PPM1A;YWHAQ;SPRTN;UBE2V1
hsa-miR-513c-3p	5/184	0.103183	0.313367	0	0	2.06873	4.69861	NEDD1;YWHAB;TWF1;MRPS18C;C16ORF87
hsa-miR-3118	1984-03-01	0.104051	0.314065	0	0	2.73601	6.19124	EGLN1;POT1;HSPD1
hsa-miR-4511	1984-03-01	0.104051	0.314065	0	0	2.73601	6.19124	MORF4L2;GNAQ;AVL9
hsa-miR-4319	1984-03-01	0.104051	0.314065	0	0	2.73601	6.19124	IPPK;REST;CSNK2A1
hsa-miR-376b-3p	1984-03-01	0.104051	0.314065	0	0	2.73601	6.19124	PPM1A;CASP8;ZNF567
hsa-miR-379-3p	1984-03-01	0.104051	0.314065	0	0	2.73601	6.19124	FXR1;SIKE1;SGMS1
hsa-miR-4755-3p	7/295	0.104371	0.314647	0	0	1.80371	4.07603	OCLN;RRM2;RBBP4;BTBD1;YME1L1;AVL9;ACTG1
hsa-miR-490-5p	1941-02-01	0.10506	0.315181	0	0	3.7822	8.52212	RNF168;RBM18
hsa-miR-643	1941-02-01	0.10506	0.315181	0	0	3.7822	8.52212	B3GNT2;MAPK14
hsa-miR-3945	1941-02-01	0.10506	0.315181	0	0	3.7822	8.52212	DDX47;KIF5B
hsa-miR-6826-5p	1941-02-01	0.10506	0.315181	0	0	3.7822	8.52212	UBE2G1;ZNF567
hsa-miR-513a-3p	5/186	0.106744	0.317853	0	0	2.04566	4.57681	NEDD1;YWHAB;TWF1;MRPS18C;C16ORF87
hsa-miR-379-5p	1985-03-01	0.106842	0.317853	0	0	2.7025	6.04388	TRUB1;ELMOD2;SF3B1
hsa-miR-3194-5p	1985-03-01	0.106842	0.317853	0	0	2.7025	6.04388	ISY1;G3BP2;ACTG1
hsa-miR-589-3p	1985-03-01	0.106842	0.317853	0	0	2.7025	6.04388	RAB5C;CAPRIN1;ACTG1
mmu-miR-1187	4/134	0.107112	0.317853	0	0	2.27588	5.08403	SIKE1;CASP8;PGM3;GABPB1
mmu-miR-466a-5p	4/134	0.107112	0.317853	0	0	2.27588	5.08403	SIKE1;CASP8;PGM3;GABPB1
hsa-miR-505-5p	4/134	0.107112	0.317853	0	0	2.27588	5.08403	SET;PPP1R8;NUP35;ALDOA
mmu-miR-466e-5p	4/134	0.107112	0.317853	0	0	2.27588	5.08403	SIKE1;CASP8;PGM3;GABPB1
mmu-miR-466p-5p	4/134	0.107112	0.317853	0	0	2.27588	5.08403	SIKE1;CASP8;PGM3;GABPB1
hsa-miR-574-5p	9/415	0.109025	0.321547	0	0	1.64764	3.65147	EEA1;MFSD14A;MFSD14B;PLSCR1;LMBR1;RALGAPB;SON;AMD1;HPS3
hsa-miR-7856-5p	4/135	0.109286	0.321547	0	0	2.25839	4.9996	ARIH1;AIDA;HS6ST1;ANAPC1
hsa-miR-3173-3p	4/135	0.109286	0.321547	0	0	2.25839	4.9996	SET;CSNK2A1;TPM3;UBE2G1
hsa-miR-4696	4/135	0.109286	0.321547	0	0	2.25839	4.9996	PLEKHB2;KIF5B;NUP153;SEC23B
hsa-miR-2110	4/135	0.109286	0.321547	0	0	2.25839	4.9996	CSNK2A1;MIER3;EIF4H;UBE2V1
hsa-miR-6892-5p	1942-02-01	0.109375	0.321547	0	0	3.68745	8.16024	TUBB;ARIH1
mmu-miR-200a-3p	1942-02-01	0.109375	0.321547	0	0	3.68745	8.16024	LSM12;HIPK3
hsa-miR-450b-3p	1986-03-01	0.109663	0.321547	0	0	2.66981	5.90119	STAU1;CACYBP;THAP1
hsa-miR-3188	1986-03-01	0.109663	0.321547	0	0	2.66981	5.90119	CSNK2A1;CKS1B;ACTG1
hsa-miR-770-5p	1986-03-01	0.109663	0.321547	0	0	2.66981	5.90119	NUP35;CCT7;PRLR
hsa-miR-98-5p	15/785	0.109898	0.321854	0	0	1.45421	3.21119	KLF10;MRS2;PRIM2;RRM2;SGMS1;MBD2;UBE2D3;AMD1;TMTC3;PLEKHA3;SENP2;POLR2D;SNRPA1;ARIH1;EIF4G2
hsa-miR-216a-3p	6/243	0.110694	0.323417	0	0	1.8765	4.13014	DYNC2LI1;NUS1;AKIRIN1;RBBP4;TMTC3;SOS1
hsa-miR-3681-3p	6/243	0.110694	0.323417	0	0	1.8765	4.13014	DYNC2LI1;NUS1;AKIRIN1;RBBP4;TMTC3;SOS1
hsa-miR-381-3p	4/136	0.111479	0.324939	0	0	2.24117	4.91693	KLF10;SGMS1;DSG2;ACP1
hsa-miR-6795-5p	4/136	0.111479	0.324939	0	0	2.24117	4.91693	SON;EIF4H;UBE2V1;SENP2
hsa-miR-3133	5/189	0.112197	0.325637	0	0	2.012	4.40125	IPPK;SON;PGK1;GCC2;AVL9
hsa-miR-613	1987-03-01	0.112512	0.325637	0	0	2.63789	5.76298	RAB5C;MATR3;STAMBP
hsa-miR-202-5p	1987-03-01	0.112512	0.325637	0	0	2.63789	5.76298	TRUB1;FXR1;MBD2
mmu-miR-5127	1987-03-01	0.112512	0.325637	0	0	2.63789	5.76298	KIF5B;GABPB1;EIF4G2
hsa-miR-1283	1987-03-01	0.112512	0.325637	0	0	2.63789	5.76298	NUS1;PPP1R8;RNPS1
hsa-miR-8071	1987-03-01	0.112512	0.325637	0	0	2.63789	5.76298	CAPN7;DYRK1A;UBE2V1
hsa-miR-185-5p	8/359	0.112736	0.325903	0	0	1.69237	3.69395	SET;PLEKHB2;TUBB;EIF4H;MATR3;UBE2V1;ARIH1;RAE1
hsa-miR-3649	1943-02-01	0.113735	0.327378	0	0	3.59733	7.82018	HDLBP;MEMO1
hsa-miR-591	1943-02-01	0.113735	0.327378	0	0	3.59733	7.82018	PGGT1B;PAWR
hsa-miR-5579-5p	1943-02-01	0.113735	0.327378	0	0	3.59733	7.82018	OCLN;PRLR
hsa-miR-4701-5p	6/245	0.113893	0.327378	0	0	1.8606	4.04216	ISY1;RBBP4;GMPS;PGM3;YME1L1;THAP1
hsa-miR-6776-5p	5/190	0.114044	0.327378	0	0	2.00102	4.34456	TPM3;AMD1;RNPS1;GABPB1;ALDOA
hsa-miR-4465	5/190	0.114044	0.327378	0	0	2.00102	4.34456	NUS1;AKIRIN1;RABL3;TMTC3;HSPD1
mmu-miR-448-5p	2023-09-01	0.114759	0.327903	0	0	9.19916	19.9154	LAMP2
mmu-miR-1905	2023-09-01	0.114759	0.327903	0	0	9.19916	19.9154	PDXDC1
mmu-miR-345-5p	2023-09-01	0.114759	0.327903	0	0	9.19916	19.9154	LSM12
mmu-miR-3104-3p	2023-09-01	0.114759	0.327903	0	0	9.19916	19.9154	NUS1
hsa-miR-6801-3p	1988-03-01	0.115389	0.328142	0	0	2.60672	5.62907	MIER3;UBXN7;THAP1
hsa-miR-2115-3p	1988-03-01	0.115389	0.328142	0	0	2.60672	5.62907	TRUB1;NUS1;SLC3A2
hsa-miR-6810-3p	1988-03-01	0.115389	0.328142	0	0	2.60672	5.62907	MIER3;UBXN7;THAP1
hsa-miR-548ao-5p	1988-03-01	0.115389	0.328142	0	0	2.60672	5.62907	MIER3;AMD1;SPRTN
hsa-miR-4435	6/246	0.115509	0.328142	0	0	1.85276	3.999	ISY1;RBBP4;ACOT2;GMPS;YME1L1;THAP1
hsa-miR-4729	4/138	0.115924	0.328185	0	0	2.20749	4.75675	TRUB1;SET;FAM3C;ARIH1
hsa-miR-4262	4/138	0.115924	0.328185	0	0	2.20749	4.75675	ZFAND6;FAM3C;CENPO;PDIA6
hsa-miR-494-3p	4/138	0.115924	0.328185	0	0	2.20749	4.75675	SMIM13;REST;DSG2;PLEKHA3
hsa-miR-5579-3p	1944-02-01	0.118139	0.331466	0	0	3.5115	7.50018	GNAQ;ZNF567
hsa-miR-7973	1944-02-01	0.118139	0.331466	0	0	3.5115	7.50018	IPPK;POLR2D
mmu-miR-1a-3p	1944-02-01	0.118139	0.331466	0	0	3.5115	7.50018	MAP4K3;HSPD1
hsa-miR-6891-5p	4/139	0.118175	0.331466	0	0	2.19103	4.67913	SET;CSNK2A1;TPM3;UBE2G1
hsa-miR-4711-3p	1989-03-01	0.118294	0.331466	0	0	2.57628	5.49928	RALGAPB;FEM1B;UBE2V1
hsa-miR-580-5p	1989-03-01	0.118294	0.331466	0	0	2.57628	5.49928	SON;ZFAND6;GTF2I
hsa-miR-6822-3p	1989-03-01	0.118294	0.331466	0	0	2.57628	5.49928	ATP6V0E1;HM13;HNRNPA1L2
hsa-miR-1299	1989-03-01	0.118294	0.331466	0	0	2.57628	5.49928	B3GNT2;AVL9;TMPO
hsa-miR-5047	1989-03-01	0.118294	0.331466	0	0	2.57628	5.49928	PLEKHF2;MRS2;PAWR
mmu-miR-709	6/248	0.118777	0.332062	0	0	1.83726	3.91429	TRUB1;SENP5;TUBB;ACOT2;KNOP1;SLC3A2
hsa-miR-153-5p	6/248	0.118777	0.332062	0	0	1.83726	3.91429	SLC30A6;PPM1A;SON;FEM1B;PLEKHA3;MAPK14
mmu-miR-129-2-3p	4/140	0.120446	0.335585	0	0	2.17481	4.6031	CASP8;PDXDC1;ECD;AIDA
hsa-miR-2392	4/140	0.120446	0.335585	0	0	2.17481	4.6031	CASP8;MORF4L2;HM13;LIN52
mmu-miR-129-1-3p	4/140	0.120446	0.335585	0	0	2.17481	4.6031	CASP8;PDXDC1;ECD;AIDA
hsa-miR-4477b	1990-03-01	0.121226	0.336238	0	0	2.54654	5.37345	ARIH1;AIDA;ANAPC1
hsa-miR-4425	1990-03-01	0.121226	0.336238	0	0	2.54654	5.37345	STAU1;KIF5B;CACYBP
hsa-miR-4802-5p	1990-03-01	0.121226	0.336238	0	0	2.54654	5.37345	RRM2;UBE2D3;AVL9
hsa-miR-548ax	1990-03-01	0.121226	0.336238	0	0	2.54654	5.37345	MIER3;AMD1;SPRTN
hsa-miR-1297	5/194	0.121577	0.336834	0	0	1.95827	4.12648	NUS1;AKIRIN1;RABL3;TMTC3;HSPD1
hsa-miR-665	14/735	0.121735	0.336892	0	0	1.44755	3.04841	TGIF1;PRIM2;SLC30A6;RRM2;PLEKHB2;TPM3;AMD1;THAP1;SIKE1;CASP8;PSMC4;RSRC1;ACOT2;ALDOA
hsa-miR-410-3p	6/250	0.12209	0.337495	0	0	1.82201	3.83168	TGIF1;REST;POT1;HPS3;PLEKHA3;PHF6
hsa-miR-6767-3p	1945-02-01	0.122586	0.337729	0	0	3.42967	7.19867	RBBP4;ACOT2
hsa-miR-422a	1945-02-01	0.122586	0.337729	0	0	3.42967	7.19867	REST;HIPK3
mmu-miR-30c-5p	1945-02-01	0.122586	0.337729	0	0	3.42967	7.19867	SMAD1;TWF1
hsa-miR-1253	5/195	0.123497	0.339098	0	0	1.94787	4.07405	TGIF1;CSNK2A1;CTBP1;TUBB;UBE2V1
hsa-miR-503-5p	6/251	0.123764	0.339098	0	0	1.81448	3.79114	PPM1A;HNRNPK;RALGAPB;KIF5B;EIF4H;HNRNPA1L2
hsa-miR-1224-5p	1991-03-01	0.124184	0.339098	0	0	2.51747	5.25142	PLSCR1;UBE2V1;KDM6A
hsa-miR-920	1991-03-01	0.124184	0.339098	0	0	2.51747	5.25142	UBE2D3;AVL9;HS6ST1
hsa-miR-5591-5p	1991-03-01	0.124184	0.339098	0	0	2.51747	5.25142	UBE2D3;AVL9;HS6ST1
hsa-miR-4742-5p	1991-03-01	0.124184	0.339098	0	0	2.51747	5.25142	REST;EIF4H;EIF4G2
hsa-miR-4677-5p	1991-03-01	0.124184	0.339098	0	0	2.51747	5.25142	LMBR1;CAPRIN1;STAMBP
hsa-miR-6726-5p	1991-03-01	0.124184	0.339098	0	0	2.51747	5.25142	UBE2D3;AVL9;HS6ST1
hsa-miR-4713-5p	5/196	0.12543	0.342119	0	0	1.93757	4.02241	NCKAP1;PPM1A;TMEM87B;NFYA;PSMC1
hsa-miR-4442	2023-10-01	0.126671	0.343064	0	0	8.17662	16.8942	MEMO1
hsa-miR-1249-3p	2023-10-01	0.126671	0.343064	0	0	8.17662	16.8942	PRLR
hsa-miR-518e-3p	2023-10-01	0.126671	0.343064	0	0	8.17662	16.8942	CSNK2A1
hsa-miR-181a-5p	11/552	0.126856	0.343064	0	0	1.51234	3.12254	PRDX3;ATP6V0E1;TUBB;ZFAND6;G3BP2;CENPO;FAM3C;PRLR;PDIA6;ARL6IP6;MCL1
hsa-miR-5704	1946-02-01	0.127073	0.343064	0	0	3.35155	6.91423	OCLN;PLSCR1
mmu-miR-3071-5p	1946-02-01	0.127073	0.343064	0	0	3.35155	6.91423	RNF168;ECD
hsa-miR-3913-3p	1946-02-01	0.127073	0.343064	0	0	3.35155	6.91423	NCKAP1;FEM1B
hsa-miR-4300	1992-03-01	0.127169	0.343064	0	0	2.48906	5.13304	UBE2D3;AVL9;HS6ST1
hsa-miR-506-5p	1992-03-01	0.127169	0.343064	0	0	2.48906	5.13304	PLSCR1;TPM3;CENPO
hsa-miR-4519	1992-03-01	0.127169	0.343064	0	0	2.48906	5.13304	FEM1B;UBE2D3;UBE2V1
hsa-miR-8063	5/197	0.127377	0.343248	0	0	1.92738	3.97157	PRDX3;CAPN7;FEM1B;TMEM67;LSM3
mmu-miR-706	6/254	0.128853	0.346636	0	0	1.79225	3.67248	OCLN;SENP5;KNOP1;MFN1;SLC3A2;PEX13
hsa-miR-3153	5/198	0.129338	0.346636	0	0	1.91729	3.9215	IPPK;HDLBP;UBE2V1;SENP2;MCL1
hsa-miR-6876-5p	5/198	0.129338	0.346636	0	0	1.91729	3.9215	DDB1;TMEM87B;SET;EIF4H;ALDOA
hsa-miR-4476	5/198	0.129338	0.346636	0	0	1.91729	3.9215	DDB1;TMEM87B;SET;EIF4H;ALDOA
hsa-miR-6733-5p	5/198	0.129338	0.346636	0	0	1.91729	3.9215	IPPK;HDLBP;UBE2V1;SENP2;MCL1
hsa-miR-551b-5p	4/144	0.129712	0.347262	0	0	2.11224	4.31411	SON;YWHAB;UBE2D3;AMD1
hsa-miR-6830-3p	1993-03-01	0.130179	0.347379	0	0	2.46128	5.01816	UBE2V1;SCAMP1;DCK
hsa-miR-5587-5p	1993-03-01	0.130179	0.347379	0	0	2.46128	5.01816	RNF168;RAB5C;MAP2K6
hsa-miR-6730-5p	1993-03-01	0.130179	0.347379	0	0	2.46128	5.01816	RAB5C;TPM3;TWF1
hsa-miR-4460	1947-02-01	0.131598	0.349273	0	0	3.2769	6.64558	IPPK;AIDA
hsa-miR-6874-3p	1947-02-01	0.131598	0.349273	0	0	3.2769	6.64558	UBQLN1;EIF4H
hsa-miR-517-5p	1947-02-01	0.131598	0.349273	0	0	3.2769	6.64558	ALDOA;ACTG1
hsa-miR-6846-3p	1947-02-01	0.131598	0.349273	0	0	3.2769	6.64558	IPPK;POLR2D
hsa-miR-3682-3p	1947-02-01	0.131598	0.349273	0	0	3.2769	6.64558	NUS1;TCEA1
hsa-miR-6773-3p	4/145	0.132074	0.349783	0	0	2.09715	4.24545	RAB5C;MAPK14;HNRNPA1L2;STRN3
hsa-miR-500a-5p	4/145	0.132074	0.349783	0	0	2.09715	4.24545	PLEKHB2;RBBP4;GNAQ;YME1L1
hsa-miR-181b-5p	8/374	0.133158	0.351668	0	0	1.62176	3.26982	TUBB;ZFAND6;G3BP2;CENPO;FAM3C;ILF2;PDIA6;MCL1
hsa-miR-8084	1994-03-01	0.133214	0.351668	0	0	2.43411	4.90667	CCT6A;TUBB;PAWR
hsa-miR-4518	1994-03-01	0.133214	0.351668	0	0	2.43411	4.90667	ISY1;AKIRIN1;ANAPC7
hsa-miR-4524a-3p	7/315	0.133738	0.352672	0	0	1.68485	3.38972	POLR2D;RABL3;MAPK14;ALDOA;GTF2H3;LIN52;THAP1
hsa-miR-330-3p	4/146	0.134454	0.354142	0	0	2.08227	4.17816	PLEKHB2;TUBB;NUP153;SRP9
mmu-miR-301b-3p	8/375	0.134583	0.354142	0	0	1.61725	3.24353	KLF10;ATF2;PARG;NFYA;YWHAB;ADAM10;AGFG1;GTF2I
hsa-miR-146a-5p	5/201	0.135303	0.355177	0	0	1.88766	3.77577	SIKE1;BCLAF1;AVL9;SOS1;LIN52
hsa-miR-1303	5/201	0.135303	0.355177	0	0	1.88766	3.77577	SON;NCBP2;RBM18;TWF1;THAP1
hsa-miR-425-3p	1948-02-01	0.136159	0.355177	0	0	3.2055	6.39155	HDLBP;GABPB1
hsa-miR-4512	1948-02-01	0.136159	0.355177	0	0	3.2055	6.39155	TMEM67;KIF5B
hsa-miR-6859-3p	1948-02-01	0.136159	0.355177	0	0	3.2055	6.39155	IPPK;POLR2D
hsa-miR-5008-3p	1948-02-01	0.136159	0.355177	0	0	3.2055	6.39155	SET;HNRNPA1L2
hsa-miR-4317	1948-02-01	0.136159	0.355177	0	0	3.2055	6.39155	MIER3;CAPRIN1
hsa-miR-548m	1995-03-01	0.136274	0.355177	0	0	2.40753	4.79842	TSNAX;RNPS1;UBE2V1
hsa-miR-1266-5p	1995-03-01	0.136274	0.355177	0	0	2.40753	4.79842	ISY1;AKIRIN1;ANAPC7
hsa-miR-2681-5p	4/147	0.136851	0.356304	0	0	2.06761	4.11219	FXR1;MFSD14A;G3BP2;ASB3
hsa-miR-9500	5/202	0.137318	0.357142	0	0	1.87798	3.72865	ISY1;TGIF1;TPM3;AMD1;C16ORF87
mmu-miR-3964	2023-11-01	0.138423	0.357751	0	0	7.35858	14.5512	DCUN1D1
hsa-miR-5705	2023-11-01	0.138423	0.357751	0	0	7.35858	14.5512	PDIA6
mmu-miR-208b-3p	2023-11-01	0.138423	0.357751	0	0	7.35858	14.5512	MCL1
hsa-miR-1204	2023-11-01	0.138423	0.357751	0	0	7.35858	14.5512	RAB5C
mmu-miR-3069-5p	2023-11-01	0.138423	0.357751	0	0	7.35858	14.5512	CHMP5
mmu-miR-681	2023-11-01	0.138423	0.357751	0	0	7.35858	14.5512	AIDA
hsa-miR-6809-3p	7/319	0.140058	0.360751	0	0	1.66291	3.26878	TRUB1;PARG;CSNK2A1;YWHAB;PPP1R8;PIK3CB;LSM3
hsa-miR-4274	1949-02-01	0.140756	0.360751	0	0	3.13714	6.15109	UBE2V1;PDIA6
hsa-miR-4703-3p	1949-02-01	0.140756	0.360751	0	0	3.13714	6.15109	PLEKHF2;ALDOA
hsa-miR-550a-3p	1949-02-01	0.140756	0.360751	0	0	3.13714	6.15109	TPM3;FEM1B
mmu-miR-30a-5p	1949-02-01	0.140756	0.360751	0	0	3.13714	6.15109	SMAD1;TWF1
hsa-miR-3689f	1949-02-01	0.140756	0.360751	0	0	3.13714	6.15109	PGM3;HPS3
hsa-miR-4693-5p	1949-02-01	0.140756	0.360751	0	0	3.13714	6.15109	REST;ALDOA
mmu-miR-451a	1949-02-01	0.140756	0.360751	0	0	3.13714	6.15109	ATF2;AVL9
hsa-miR-5703	5/204	0.141388	0.360869	0	0	1.85892	3.6365	OCLN;REST;SET;UBE2G1;SENP2
hsa-miR-7113-3p	5/204	0.141388	0.360869	0	0	1.85892	3.6365	TMEM87B;CSNK2A1;CAPRIN1;HDLBP;MAPK14
hsa-miR-4434	5/204	0.141388	0.360869	0	0	1.85892	3.6365	OCLN;REST;SET;UBE2G1;SENP2
hsa-miR-6739-5p	5/204	0.141388	0.360869	0	0	1.85892	3.6365	IPPK;HDLBP;UBE2V1;SENP2;MCL1
hsa-miR-3591-5p	1997-03-01	0.142465	0.363241	0	0	2.35606	4.59117	IPPK;SLC39A9;LIN52
hsa-miR-4516	5/205	0.143443	0.364431	0	0	1.84953	3.59144	OCLN;REST;SET;UBE2G1;SENP2
hsa-miR-196a-3p	5/205	0.143443	0.364431	0	0	1.84953	3.59144	KLF10;FIGNL1;EIF4H;CENPO;EIF4G2
hsa-miR-451b	4/150	0.144145	0.364431	0	0	2.02481	3.92193	PLEKHB2;KIF5B;LAMP2;ADAM9
hsa-miR-10b-5p	7/322	0.144893	0.364431	0	0	1.64682	3.18126	SON;CSNK2A1;CTBP1;RSRC1;FEM1B;UBXN7;ACTG1
hsa-miR-3169	1950-02-01	0.145385	0.364431	0	0	3.07163	5.92324	RRM2;HNRNPA1L2
hsa-miR-3689b-5p	1950-02-01	0.145385	0.364431	0	0	3.07163	5.92324	PGM3;HPS3
hsa-miR-3689a-5p	1950-02-01	0.145385	0.364431	0	0	3.07163	5.92324	PGM3;HPS3
hsa-miR-200c-5p	1950-02-01	0.145385	0.364431	0	0	3.07163	5.92324	TPM3;FEM1B
mmu-miR-431-5p	1950-02-01	0.145385	0.364431	0	0	3.07163	5.92324	SENP5;PEX13
mmu-miR-669e-5p	1950-02-01	0.145385	0.364431	0	0	3.07163	5.92324	SENP5;PEX13
hsa-miR-3689e	1950-02-01	0.145385	0.364431	0	0	3.07163	5.92324	PGM3;HPS3
hsa-miR-1298-3p	1950-02-01	0.145385	0.364431	0	0	3.07163	5.92324	TMTC3;TMPO
hsa-miR-4799-3p	1950-02-01	0.145385	0.364431	0	0	3.07163	5.92324	ITGB1;AMD1
hsa-miR-6765-5p	1998-03-01	0.145595	0.364431	0	0	2.33114	4.49194	PLEKHF2;CSNK2A1;CKS1B
hsa-miR-4724-5p	1998-03-01	0.145595	0.364431	0	0	2.33114	4.49194	CTBP2;TPM3;G3BP2
hsa-miR-6128	1998-03-01	0.145595	0.364431	0	0	2.33114	4.49194	B3GNT2;AVL9;TMPO
hsa-miR-4432	1998-03-01	0.145595	0.364431	0	0	2.33114	4.49194	RAB5C;ANAPC7;KIF5B
hsa-miR-8066	1998-03-01	0.145595	0.364431	0	0	2.33114	4.49194	SLC39A9;PAWR;POT1
hsa-miR-429	4/151	0.14661	0.366228	0	0	2.01094	3.86095	NGRN;NCOA2;RBBP4;TUBB
hsa-miR-6793-3p	4/151	0.14661	0.366228	0	0	2.01094	3.86095	IPPK;AKIRIN1;RABL3;ALDOA
mmu-miR-669f-3p	5/207	0.147591	0.367358	0	0	1.83103	3.50332	CCDC138;TCTN3;TUBB;B3GNT2;ADAM9
hsa-miR-1229-3p	5/207	0.147591	0.367358	0	0	1.83103	3.50332	HNRNPK;POLR2D;GABPB1;EIF4G2;GTF2I
mmu-miR-467f	6/265	0.148351	0.367358	0	0	1.71517	3.27284	PARG;B3GNT2;ADAM9;MEMO1;ARMC8;GABPB1
hsa-miR-3607-3p	1999-03-01	0.148748	0.367358	0	0	2.30674	4.39551	MIER3;FAM3C;EIF4G2
hsa-miR-2114-5p	1999-03-01	0.148748	0.367358	0	0	2.30674	4.39551	ITGB1;UBE2V1;AVL9
hsa-miR-448	1999-03-01	0.148748	0.367358	0	0	2.30674	4.39551	FXR1;ADAM10;TWF1
hsa-miR-2113	4/152	0.149092	0.367358	0	0	1.99725	3.80115	SMIM13;CAPRIN1;DYRK1A;HNRNPA1L2
hsa-miR-4468	4/152	0.149092	0.367358	0	0	1.99725	3.80115	RAB5C;PLEKHB2;G3BP2;ALDOA
mmu-miR-1936	2023-12-01	0.150018	0.367358	0	0	6.68928	12.6896	HIPK3
hsa-miR-518d-3p	2023-12-01	0.150018	0.367358	0	0	6.68928	12.6896	ARIH1
mmu-miR-3967	2023-12-01	0.150018	0.367358	0	0	6.68928	12.6896	RBBP4
mmu-miR-208a-3p	2023-12-01	0.150018	0.367358	0	0	6.68928	12.6896	MCL1
mmu-miR-1942	2023-12-01	0.150018	0.367358	0	0	6.68928	12.6896	ARL6IP6
hsa-miR-518a-3p	2023-12-01	0.150018	0.367358	0	0	6.68928	12.6896	ARIH1
hsa-miR-628-5p	1951-02-01	0.150046	0.367358	0	0	3.00879	5.70712	PLSCR1;EIF4H
hsa-miR-4720-5p	1951-02-01	0.150046	0.367358	0	0	3.00879	5.70712	ITGB1;AMD1
hsa-miR-3135a	1951-02-01	0.150046	0.367358	0	0	3.00879	5.70712	KLF10;DYRK1A
hsa-miR-596	1951-02-01	0.150046	0.367358	0	0	3.00879	5.70712	ARL6IP6;MCL1
hsa-miR-1278	1951-02-01	0.150046	0.367358	0	0	3.00879	5.70712	SPRTN;RNPS1
hsa-miR-5588-5p	1951-02-01	0.150046	0.367358	0	0	3.00879	5.70712	ITGB1;AMD1
hsa-miR-3973	4/153	0.151589	0.370114	0	0	1.98374	3.74249	FXR1;ELMOD2;HIPK3;TMPO
hsa-miR-7515	4/153	0.151589	0.370114	0	0	1.98374	3.74249	NCOA2;SET;MIER3;PDIA6
hsa-miR-6867-3p	5/209	0.15179	0.370114	0	0	1.81289	3.41776	NCKAP1;TMEM87B;CSNK2A1;CAPRIN1;MAPK14
hsa-miR-7850-5p	3/100	0.151923	0.370114	0	0	2.28285	4.30176	LSM12;YWHAB;TMEM67
hsa-miR-4308	3/100	0.151923	0.370114	0	0	2.28285	4.30176	PRDX3;ITGB1;FAM3C
hsa-miR-4685-3p	6/268	0.153889	0.374212	0	0	1.69527	3.17273	TMEM87B;CSNK2A1;MIER3;CAPRIN1;MAPK14;PRLR
hsa-miR-4423-5p	5/210	0.153909	0.374212	0	0	1.80395	3.37591	RBBP4;YWHAB;NCBP2;POLR2D;MAPK14
mmu-miR-3087-3p	4/154	0.154102	0.374314	0	0	1.97042	3.68495	RNF168;G3BP2;TCEA1;GABPB1
hsa-miR-99b-5p	1952-02-01	0.154736	0.3751	0	0	2.94846	5.50194	DYRK1A;ACTG1
hsa-miR-1273d	1952-02-01	0.154736	0.3751	0	0	2.94846	5.50194	SON;PDIA6
hsa-miR-33b-5p	3/101	0.155119	0.3751	0	0	2.25944	4.21061	ATP6V0E1;CAPRIN1;PGM3
hsa-miR-7853-5p	3/101	0.155119	0.3751	0	0	2.25944	4.21061	NUS1;REST;PDIA6
hsa-miR-93-3p	6/269	0.155756	0.3751	0	0	1.68873	3.14014	GPR89A;ANAPC7;DHX9;EIF4H;RNF4;GPR89B
hsa-miR-4287	6/269	0.155756	0.3751	0	0	1.68873	3.14014	TMEM87B;CSNK2A1;MIER3;CAPRIN1;MAPK14;PRLR
hsa-miR-6840-3p	9/451	0.155904	0.3751	0	0	1.51062	2.80752	TGIF1;SIKE1;RRM2;AMD1;ACOT2;RABL3;UBXN7;SCAMP1;ALDOA
hsa-miR-6501-5p	5/211	0.156039	0.3751	0	0	1.79511	3.33467	RBBP4;YWHAB;NCBP2;POLR2D;MAPK14
hsa-miR-1827	15/834	0.156155	0.3751	0	0	1.36368	2.53222	PLEKHF2;SLC30A6;ATP6V0E1;PLEKHB2;TPM3;TUBB;UBE2G1;UBR1;THAP1;SIKE1;CASP8;SENP5;PSMC4;RSRC1;ACOT2
hsa-miR-23a-5p	4/155	0.156632	0.3751	0	0	1.95727	3.62849	NCKAP1;RAB5C;HM13;GPATCH2L
hsa-miR-6888-5p	4/155	0.156632	0.3751	0	0	1.95727	3.62849	PLSCR1;RRM2;CSNK2A1;NUP153
hsa-miR-23b-5p	4/155	0.156632	0.3751	0	0	1.95727	3.62849	NCKAP1;RAB5C;HM13;GPATCH2L
hsa-miR-3671	4/155	0.156632	0.3751	0	0	1.95727	3.62849	KLF10;CSNK2A1;PDIA6;GTF2I
hsa-miR-504-3p	8/390	0.156875	0.3751	0	0	1.55255	2.87579	NUS1;YWHAB;HM13;POLR2D;RABL3;YME1L1;SEC23B;LIN52
hsa-miR-4284	12/641	0.156991	0.3751	0	0	1.418	2.62552	NCKAP1;ATP6V0E1;PRPF6;RBBP4;HM13;POLR2D;GMPS;YME1L1;ALDOA;AVL9;SF3B1;STRN3
hsa-miR-3202	6/270	0.157632	0.3751	0	0	1.68225	3.10794	TGIF1;SET;HDLBP;EIF4H;UBE2V1;SENP2
hsa-miR-4649-5p	3/102	0.158336	0.3751	0	0	2.2365	4.12195	KIF5B;RNPS1;PLEKHA3
hsa-miR-1255a	3/102	0.158336	0.3751	0	0	2.2365	4.12195	RNF168;MFSD14B;YWHAB
hsa-miR-1255b-5p	3/102	0.158336	0.3751	0	0	2.2365	4.12195	RNF168;MFSD14B;YWHAB
hsa-miR-1234-3p	4/156	0.159176	0.3751	0	0	1.94429	3.57311	WDR53;PLEKHA3;ALDOA;MAPK14
hsa-miR-583	4/156	0.159176	0.3751	0	0	1.94429	3.57311	SON;YWHAQ;ARIH1;LIN52
hsa-miR-1180-5p	1953-02-01	0.159454	0.3751	0	0	2.8905	5.30697	MFSD14A;ADAM9
hsa-miR-4489	1953-02-01	0.159454	0.3751	0	0	2.8905	5.30697	STAMBP;U2SURP
hsa-miR-5681b	1953-02-01	0.159454	0.3751	0	0	2.8905	5.30697	NCKAP1;MIER3
hsa-miR-7114-3p	1953-02-01	0.159454	0.3751	0	0	2.8905	5.30697	MFSD14A;ADAM9
hsa-miR-638	1953-02-01	0.159454	0.3751	0	0	2.8905	5.30697	MIER3;THAP1
hsa-miR-367-3p	7/331	0.159865	0.3751	0	0	1.60033	2.93409	TMEM41A;KIF5B;GNAQ;AMD1;PAWR;TWF1;RNF4
hsa-miR-186-3p	9/454	0.160202	0.3751	0	0	1.50021	2.74736	ISY1;SGMS1;AMD1;WDR53;PAWR;MAPK14;ALDOA;GTF2H3;PRELID3B
mmu-miR-339-5p	5/213	0.160337	0.3751	0	0	1.77766	3.25397	OCLN;SENP5;KNOP1;MFN1;PEX13
mmu-miR-126a-3p	2013-01-01	0.161457	0.3751	0	0	6.13153	11.181	ADAM9
hsa-miR-29c-5p	2013-01-01	0.161457	0.3751	0	0	6.13153	11.181	RAB5C
hsa-miR-3687	2013-01-01	0.161457	0.3751	0	0	6.13153	11.181	MEMO1
hsa-miR-3683	2013-01-01	0.161457	0.3751	0	0	6.13153	11.181	THAP1
mmu-miR-5121	2013-01-01	0.161457	0.3751	0	0	6.13153	11.181	RBBP4
mmu-miR-877-5p	2013-01-01	0.161457	0.3751	0	0	6.13153	11.181	UBXN7
mmu-miR-5106	2013-01-01	0.161457	0.3751	0	0	6.13153	11.181	SENP5
mmu-miR-433-3p	2013-01-01	0.161457	0.3751	0	0	6.13153	11.181	UBR1
hsa-miR-4536-3p	2013-01-01	0.161457	0.3751	0	0	6.13153	11.181	ISY1
mmu-miR-92b-3p	2013-01-01	0.161457	0.3751	0	0	6.13153	11.181	ZNF567
mmu-miR-344f-3p	2013-01-01	0.161457	0.3751	0	0	6.13153	11.181	MCL1
hsa-miR-6777-3p	3/103	0.161574	0.3751	0	0	2.21402	4.03571	NFYA;CAPRIN1;ALDOA
mmu-miR-150-5p	3/103	0.161574	0.3751	0	0	2.21402	4.03571	KIF5B;GABPB1;EIF4G2
hsa-miR-4733-3p	3/103	0.161574	0.3751	0	0	2.21402	4.03571	TMEM237;AMD1;GABPB1
hsa-miR-6729-5p	3/103	0.161574	0.3751	0	0	2.21402	4.03571	KIF5B;RNPS1;PLEKHA3
hsa-miR-6792-5p	3/103	0.161574	0.3751	0	0	2.21402	4.03571	SLC39A9;FEM1B;B3GNT2
hsa-miR-6501-3p	4/157	0.161736	0.3751	0	0	1.93148	3.51876	MFSD14B;RAB5C;KIF5B;AVL9
hsa-miR-2116-3p	4/157	0.161736	0.3751	0	0	1.93148	3.51876	PPM1A;NFYA;PSMC1;HIPK3
hsa-miR-7107-5p	4/157	0.161736	0.3751	0	0	1.93148	3.51876	WDR53;PLEKHA3;ALDOA;MAPK14
hsa-miR-6806-5p	1954-02-01	0.164198	0.378576	0	0	2.83477	5.12153	SLC30A6;PPM1A
hsa-miR-200a-5p	1954-02-01	0.164198	0.378576	0	0	2.83477	5.12153	KLF10;ALDOA
mmu-miR-5098	1954-02-01	0.164198	0.378576	0	0	2.83477	5.12153	GABPB1;THAP1
hsa-miR-3137	1954-02-01	0.164198	0.378576	0	0	2.83477	5.12153	MAPK14;HNRNPA1L2
hsa-miR-4774-3p	1954-02-01	0.164198	0.378576	0	0	2.83477	5.12153	SET;MAPK14
hsa-miR-4466	1954-02-01	0.164198	0.378576	0	0	2.83477	5.12153	ATP6V0E1;PRPF6
hsa-miR-2276-3p	4/158	0.164311	0.378576	0	0	1.91884	3.46542	MATR3;SF3B1;CKS1B;STRN3
hsa-miR-4707-3p	3/104	0.164831	0.379066	0	0	2.19199	3.95179	PGK1;WDR53;SEC23B
hsa-miR-6827-5p	3/104	0.164831	0.379066	0	0	2.19199	3.95179	NUS1;NUP35;AVL9
hsa-miR-211-5p	7/334	0.165007	0.379116	0	0	1.58541	2.85653	RRM2;MIER3;SLC39A9;FEM1B;CAPRIN1;G3BP2;PRLR
hsa-miR-320a	11/584	0.165496	0.379884	0	0	1.4255	2.56421	PRDX3;PSMD10;LSM12;MCRS1;TUBB;UBE2G1;GART;TMPO;ACTG1;CKS1B;MCL1
hsa-miR-4635	7/335	0.166738	0.382379	0	0	1.58049	2.83119	PLSCR1;PARG;RBBP4;YWHAQ;TPM3;UBE2D3;C17ORF80
hsa-miR-3691-3p	3/105	0.168108	0.382801	0	0	2.17039	3.87012	MFSD14A;YWHAQ;ELMOD2
hsa-miR-587	3/105	0.168108	0.382801	0	0	2.17039	3.87012	NEDD1;CAPRIN1;PRLR
hsa-miR-890	3/105	0.168108	0.382801	0	0	2.17039	3.87012	PRIM2;YWHAQ;DCK
hsa-miR-7112-5p	1955-02-01	0.168968	0.382801	0	0	2.78115	4.94501	PGAM1;FAM3C
hsa-miR-4456	1955-02-01	0.168968	0.382801	0	0	2.78115	4.94501	CAPN7;UBE2V1
hsa-miR-3129-3p	1955-02-01	0.168968	0.382801	0	0	2.78115	4.94501	EGLN1;SRP9
hsa-miR-6772-3p	1955-02-01	0.168968	0.382801	0	0	2.78115	4.94501	SET;PGAM1
hsa-miR-200b-5p	1955-02-01	0.168968	0.382801	0	0	2.78115	4.94501	KLF10;ALDOA
hsa-miR-3680-5p	1955-02-01	0.168968	0.382801	0	0	2.78115	4.94501	NUS1;RAB5C
hsa-miR-582-3p	1955-02-01	0.168968	0.382801	0	0	2.78115	4.94501	AMD1;PGGT1B
hsa-miR-4270	5/217	0.169074	0.382801	0	0	1.74376	3.09939	ISY1;PGAM1;AMD1;NUP35;MCL1
hsa-miR-455-3p	14/781	0.169399	0.382801	0	0	1.35745	2.41015	TGIF1;ITGB1;ATP6V0E1;TPM3;AMD1;CCT6A;SIKE1;MAEA;SON;SENP5;MIER3;PGM3;ALDOA;AVL9
hsa-miR-8057	4/160	0.169505	0.382801	0	0	1.89405	3.3617	ATP6V0E1;HM13;POLR2D;HNRNPA1L2
hsa-miR-518a-5p	4/160	0.169505	0.382801	0	0	1.89405	3.3617	NUS1;TMEM41A;MAPK14;MCL1
mmu-miR-10b-5p	5/218	0.171288	0.382801	0	0	1.73549	3.06211	OCLN;SENP5;KNOP1;MFN1;PEX13
mmu-miR-1186a	3/106	0.171405	0.382801	0	0	2.14921	3.79062	KIF5B;AIDA;GABPB1
hsa-miR-652-3p	4/161	0.172123	0.382801	0	0	1.88189	3.31127	CSNK2A1;MORF4L2;ZNF567;ACTG1
mmu-miR-367-3p	2014-01-01	0.172743	0.382801	0	0	5.65959	9.93797	ZNF567
mmu-miR-3099-3p	2014-01-01	0.172743	0.382801	0	0	5.65959	9.93797	AIDA
mmu-miR-654-3p	2014-01-01	0.172743	0.382801	0	0	5.65959	9.93797	SIKE1
mmu-miR-32-5p	2014-01-01	0.172743	0.382801	0	0	5.65959	9.93797	ZNF567
mmu-miR-3095-5p	2014-01-01	0.172743	0.382801	0	0	5.65959	9.93797	CASP8
hsa-miR-518b	2014-01-01	0.172743	0.382801	0	0	5.65959	9.93797	ARIH1
mmu-miR-493-3p	2014-01-01	0.172743	0.382801	0	0	5.65959	9.93797	RNF168
mmu-miR-153-3p	2014-01-01	0.172743	0.382801	0	0	5.65959	9.93797	ZNF567
hsa-miR-4798-5p	2014-01-01	0.172743	0.382801	0	0	5.65959	9.93797	SET
hsa-miR-7706	2014-01-01	0.172743	0.382801	0	0	5.65959	9.93797	CSNK2A1
hsa-miR-518c-3p	2014-01-01	0.172743	0.382801	0	0	5.65959	9.93797	ARIH1
hsa-miR-4722-3p	9/463	0.173435	0.382801	0	0	1.46978	2.57499	AKIRIN1;HM13;RABL3;GABPB1;ALDOA;SF3B1;HNRNPA1L2;CKS1B;THAP1
mmu-miR-10a-5p	5/219	0.173512	0.382801	0	0	1.72729	3.02536	OCLN;SENP5;KNOP1;MFN1;PEX13
hsa-miR-4441	5/219	0.173512	0.382801	0	0	1.72729	3.02536	ISY1;PGAM1;AMD1;NUP35;MCL1
hsa-miR-6851-5p	7/339	0.17374	0.382801	0	0	1.56113	2.73228	TGIF1;SIKE1;RRM2;PLEKHB2;AMD1;HDLBP;AVL9
hsa-miR-4490	1956-02-01	0.17376	0.382801	0	0	2.7295	4.77685	NUS1;SLC39A9
hsa-miR-3914	1956-02-01	0.17376	0.382801	0	0	2.7295	4.77685	MORF4L2;LAMP2
hsa-miR-3145-3p	1956-02-01	0.17376	0.382801	0	0	2.7295	4.77685	SMIM13;PGM3
hsa-miR-4475	1956-02-01	0.17376	0.382801	0	0	2.7295	4.77685	TUBB;ARIH1
hsa-miR-4473	1956-02-01	0.17376	0.382801	0	0	2.7295	4.77685	FEM1B;RNF4
hsa-miR-3117-5p	1956-02-01	0.17376	0.382801	0	0	2.7295	4.77685	LMBRD2;SLC39A9
hsa-miR-26b-3p	1956-02-01	0.17376	0.382801	0	0	2.7295	4.77685	MRS2;FEM1B
hsa-miR-5583-5p	1956-02-01	0.17376	0.382801	0	0	2.7295	4.77685	EGLN1;SRP9
hsa-miR-555	1956-02-01	0.17376	0.382801	0	0	2.7295	4.77685	SON;UBXN7
hsa-miR-4676-3p	1956-02-01	0.17376	0.382801	0	0	2.7295	4.77685	EGLN1;REST
hsa-miR-6759-5p	1956-02-01	0.17376	0.382801	0	0	2.7295	4.77685	RAB5C;RNF4
hsa-miR-675-3p	1956-02-01	0.17376	0.382801	0	0	2.7295	4.77685	SMAD1;LSM3
hsa-miR-105-5p	3/107	0.174719	0.384226	0	0	2.12843	3.71321	NUS1;REST;PDIA6
hsa-miR-924	3/107	0.174719	0.384226	0	0	2.12843	3.71321	IPPK;RBBP4;THAP1
hsa-miR-340-5p	7/340	0.17551	0.385621	0	0	1.55636	2.70816	KLF10;OCLN;RIT1;SON;FEM1B;PGM3;U2SURP
hsa-miR-6727-3p	9/465	0.176443	0.387325	0	0	1.46318	2.53827	AKIRIN1;HM13;RABL3;GABPB1;ALDOA;SF3B1;HNRNPA1L2;CKS1B;THAP1
hsa-miR-1248	4/163	0.177403	0.388885	0	0	1.85803	3.21315	CSNK2A1;B3GNT2;PEX13;ANAPC1
hsa-miR-6890-3p	9/466	0.177956	0.388885	0	0	1.45991	2.52012	FXR1;NCKAP1;HM13;POLR2D;ACOT2;ALDOA;SF3B1;SEC23B;STRN3
hsa-miR-320c	3/108	0.178052	0.388885	0	0	2.10806	3.63783	TUBB;MCL1;CKS1B
hsa-miR-4443	3/108	0.178052	0.388885	0	0	2.10806	3.63783	TUBB;TMEM67;ALDOA
hsa-miR-4743-3p	3/108	0.178052	0.388885	0	0	2.10806	3.63783	GMPS;EIF4G2;SRP9
hsa-miR-6883-3p	1957-02-01	0.178574	0.388885	0	0	2.67974	4.61652	RABL3;TWF1
hsa-miR-1302	1957-02-01	0.178574	0.388885	0	0	2.67974	4.61652	ISY1;TPM3
hsa-miR-193a-5p	1957-02-01	0.178574	0.388885	0	0	2.67974	4.61652	CSNK2A1;NCBP2
hsa-miR-892c-3p	1957-02-01	0.178574	0.388885	0	0	2.67974	4.61652	EGLN1;REST
hsa-miR-363-3p	7/342	0.179074	0.389627	0	0	1.54691	2.66062	TMEM41A;KIF5B;GNAQ;AMD1;PAWR;TWF1;RNF4
hsa-miR-6794-5p	4/164	0.180063	0.391433	0	0	1.84632	3.16543	SON;HDLBP;PLEKHA3;SENP2
hsa-miR-6790-3p	6/282	0.180899	0.392792	0	0	1.60812	2.74959	PLSCR1;HM13;UBA5;HDLBP;YME1L1;ALDOA
hsa-miR-875-3p	3/109	0.181402	0.392792	0	0	2.08806	3.56441	B3GNT2;AVL9;TMPO
hsa-miR-4776-3p	3/109	0.181402	0.392792	0	0	2.08806	3.56441	FXR1;CTBP1;ACTG1
hsa-miR-3714	5/223	0.182521	0.392792	0	0	1.69525	2.88344	MFSD14B;TMEM41A;SPRTN;FAM91A1;SRP9
hsa-miR-6513-3p	4/165	0.182736	0.392792	0	0	1.83476	3.11856	AKIRIN1;RABL3;ACP1;HSPD1
hsa-miR-126-3p	1958-02-01	0.183409	0.392792	0	0	2.63175	4.46355	ADAM9;TWF1
hsa-miR-1229-5p	1958-02-01	0.183409	0.392792	0	0	2.63175	4.46355	SON;FEM1B
hsa-miR-500b-5p	1958-02-01	0.183409	0.392792	0	0	2.63175	4.46355	PRDX3;CASP8
hsa-miR-758-3p	1958-02-01	0.183409	0.392792	0	0	2.63175	4.46355	SMIM13;CAPRIN1
hsa-miR-6797-3p	1958-02-01	0.183409	0.392792	0	0	2.63175	4.46355	RALGAPB;UBQLN1
hsa-miR-34c-3p	1958-02-01	0.183409	0.392792	0	0	2.63175	4.46355	NCKAP1;SMIM13
hsa-miR-8069	1958-02-01	0.183409	0.392792	0	0	2.63175	4.46355	TMEM67;UBE2V1
mmu-miR-25-3p	2015-01-01	0.183877	0.392792	0	0	5.25506	8.89939	ZNF567
mmu-miR-1941-3p	2015-01-01	0.183877	0.392792	0	0	5.25506	8.89939	ZNF627
mmu-miR-363-3p	2015-01-01	0.183877	0.392792	0	0	5.25506	8.89939	ZNF567
mmu-miR-199b-3p	2015-01-01	0.183877	0.392792	0	0	5.25506	8.89939	DYRK1A
hsa-miR-3912-3p	2015-01-01	0.183877	0.392792	0	0	5.25506	8.89939	PLEKHF2
hsa-miR-6726-3p	2015-01-01	0.183877	0.392792	0	0	5.25506	8.89939	PRLR
mmu-miR-1949	2015-01-01	0.183877	0.392792	0	0	5.25506	8.89939	PRLR
mmu-miR-219a-5p	2015-01-01	0.183877	0.392792	0	0	5.25506	8.89939	HIPK3
hsa-miR-3678-3p	3/110	0.184769	0.393058	0	0	2.06844	3.49288	SON;MORF4L2;CAPRIN1
hsa-miR-6823-5p	3/110	0.184769	0.393058	0	0	2.06844	3.49288	AKIRIN1;RABL3;GTF2H3
mmu-miR-342-3p	3/110	0.184769	0.393058	0	0	2.06844	3.49288	AKIRIN1;SCAMP1;WDR43
hsa-miR-140-3p	5/224	0.1848	0.393058	0	0	1.68742	2.84918	IPPK;INTS14;NFYA;LAMP2;UBE2V1
hsa-miR-3667-3p	5/224	0.1848	0.393058	0	0	1.68742	2.84918	CSNK2A1;CTBP2;RBBP4;CAPRIN1;ALDOA
hsa-miR-4716-3p	4/166	0.185423	0.393364	0	0	1.82334	3.07254	SON;HDLBP;PLEKHA3;SENP2
hsa-miR-3185	4/166	0.185423	0.393364	0	0	1.82334	3.07254	FXR1;MFSD14B;PGK1;HS6ST1
hsa-miR-199a-5p	4/166	0.185423	0.393364	0	0	1.82334	3.07254	CSNK2A1;TSC22D1;CENPO;MAP4K3
mmu-miR-136-5p	6/285	0.186922	0.395641	0	0	1.59058	2.66751	SENP5;DLG3;GNAQ;ADAM10;SF3B1;ANAPC1
hsa-miR-362-3p	10/536	0.187377	0.395641	0	0	1.40971	2.36074	DDB1;PPM1A;OCLN;REST;RABL3;POT1;ADAM9;PLEKHA3;UBE2V1;ARL6IP6
mmu-miR-149-5p	8/409	0.187439	0.395641	0	0	1.47753	2.47383	GPR89A;WDR1;YWHAB;FEM1B;ECD;STAM2;GTF2I;SLC39A3
mmu-miR-466e-3p	4/167	0.188122	0.395641	0	0	1.81206	3.02735	CASP8;CCDC138;TCTN3;B3GNT2
hsa-miR-1184	3/111	0.188152	0.395641	0	0	2.04919	3.42317	MRS2;CSNK2A1;UBE2G1
hsa-miR-3074-3p	1959-02-01	0.188263	0.395641	0	0	2.58545	4.31749	RNF168;TWF1
hsa-miR-1244	1959-02-01	0.188263	0.395641	0	0	2.58545	4.31749	ALDOA;DCK
hsa-miR-4417	1959-02-01	0.188263	0.395641	0	0	2.58545	4.31749	RAB5C;RNF4
hsa-miR-4711-5p	1959-02-01	0.188263	0.395641	0	0	2.58545	4.31749	CTBP2;U2SURP
hsa-miR-1179	1959-02-01	0.188263	0.395641	0	0	2.58545	4.31749	PAWR;ALDOA
hsa-miR-6076	1959-02-01	0.188263	0.395641	0	0	2.58545	4.31749	RALGAPB;UBQLN1
hsa-miR-4756-5p	6/286	0.188947	0.396739	0	0	1.58482	2.64077	RRM2;TPM3;PGAM1;UBE2D3;HDLBP;SENP2
hsa-miR-7703	9/474	0.19027	0.398888	0	0	1.43419	2.37978	KLF10;RSRC1;KIF5B;AMD1;PGM3;NUP35;PLEKHA3;RNF4;AVL9
hsa-miR-329-3p	10/538	0.190294	0.398888	0	0	1.40422	2.32986	DDB1;PPM1A;OCLN;REST;RABL3;POT1;ADAM9;PLEKHA3;UBE2V1;ARL6IP6
hsa-miR-1321	6/287	0.19098	0.399791	0	0	1.5791	2.61433	RRM2;TPM3;PGAM1;UBE2D3;HDLBP;SENP2
hsa-miR-376a-3p	3/112	0.191552	0.399791	0	0	2.03028	3.35524	PPM1A;CASP8;ZNF567
hsa-miR-3065-3p	3/112	0.191552	0.399791	0	0	2.03028	3.35524	IPPK;TMEM237;UBE2V1
hsa-miR-4738-3p	3/112	0.191552	0.399791	0	0	2.03028	3.35524	TRUB1;AMD1;ALDOA
hsa-miR-302f	5/227	0.191699	0.399791	0	0	1.66436	2.74925	NCKAP1;ATP6V0E1;RRM2;TWF1;AVL9
hsa-miR-5690	5/227	0.191699	0.399791	0	0	1.66436	2.74925	CSNK2A1;PSMC4;TPM3;ALDOA;THAP1
hsa-miR-6807-3p	1960-02-01	0.193134	0.401426	0	0	2.54075	4.17793	FXR1;TMEM67
hsa-miR-4642	1960-02-01	0.193134	0.401426	0	0	2.54075	4.17793	MEMO1;TMPO
hsa-miR-892a	1960-02-01	0.193134	0.401426	0	0	2.54075	4.17793	KIF5B;ALDOA
mmu-miR-302b-3p	1960-02-01	0.193134	0.401426	0	0	2.54075	4.17793	KIF5B;GABPB1
mmu-miR-466d-3p	4/169	0.193559	0.401507	0	0	1.78991	2.93935	CASP8;CCDC138;TCTN3;B3GNT2
mmu-miR-297b-3p	4/169	0.193559	0.401507	0	0	1.78991	2.93935	CASP8;CCDC138;TCTN3;B3GNT2
hsa-miR-6723-5p	2016-01-01	0.194862	0.401507	0	0	4.90448	8.02109	RALGAPB
mmu-miR-1298-5p	2016-01-01	0.194862	0.401507	0	0	4.90448	8.02109	NUS1
mmu-miR-3064-3p	2016-01-01	0.194862	0.401507	0	0	4.90448	8.02109	PLEKHF2
mmu-miR-542-3p	2016-01-01	0.194862	0.401507	0	0	4.90448	8.02109	PLEKHF2
hsa-miR-548al	2016-01-01	0.194862	0.401507	0	0	4.90448	8.02109	EIF4G2
mmu-miR-1251-5p	2016-01-01	0.194862	0.401507	0	0	4.90448	8.02109	MCL1
mmu-miR-683	2016-01-01	0.194862	0.401507	0	0	4.90448	8.02109	HIPK3
hsa-miR-518f-3p	2016-01-01	0.194862	0.401507	0	0	4.90448	8.02109	ARIH1
hsa-miR-4715-3p	3/113	0.194967	0.401507	0	0	2.01172	3.28902	DYNC2LI1;MAPK14;HNRNPA1L2
mmu-miR-466a-3p	4/170	0.196295	0.403906	0	0	1.77904	2.89652	CASP8;CCDC138;TCTN3;B3GNT2
hsa-miR-548am-3p	6/290	0.197131	0.404082	0	0	1.56218	2.5368	TRUB1;MFSD14B;LMBR1;RSRC1;XRN2;PGK1
hsa-miR-548ah-3p	6/290	0.197131	0.404082	0	0	1.56218	2.5368	TRUB1;MFSD14B;LMBR1;RSRC1;XRN2;PGK1
hsa-miR-4739	6/290	0.197131	0.404082	0	0	1.56218	2.5368	RRM2;TPM3;PGAM1;UBE2D3;HDLBP;SENP2
hsa-miR-766-3p	11/608	0.197877	0.404082	0	0	1.36648	2.21385	KLF10;NOMO3;ARFGEF2;ANAPC7;RSRC1;KIF5B;AMD1;ACOT2;GABPB1;AVL9;PEX13
mmu-miR-295-3p	1961-02-01	0.198022	0.404082	0	0	2.49756	4.04449	KIF5B;GABPB1
mmu-miR-294-3p	1961-02-01	0.198022	0.404082	0	0	2.49756	4.04449	KIF5B;GABPB1
hsa-miR-4529-5p	1961-02-01	0.198022	0.404082	0	0	2.49756	4.04449	EGLN1;FIGNL1
hsa-miR-4501	1961-02-01	0.198022	0.404082	0	0	2.49756	4.04449	POLR2D;POT1
hsa-miR-4298	1961-02-01	0.198022	0.404082	0	0	2.49756	4.04449	ISY1;TPM3
mmu-miR-302d-3p	1961-02-01	0.198022	0.404082	0	0	2.49756	4.04449	KIF5B;GABPB1
hsa-miR-199a-3p	3/114	0.198397	0.404178	0	0	1.9935	3.22446	SLC30A6;UBE2V1;MAPK14
hsa-miR-6801-5p	3/114	0.198397	0.404178	0	0	1.9935	3.22446	RAB5C;TPM3;PGAM1
hsa-miR-4533	5/230	0.198688	0.404436	0	0	1.64192	2.65337	TMEM87B;CTBP1;TPM3;EIF4H;UBE2V1
hsa-miR-548j-3p	6/291	0.199198	0.405139	0	0	1.55661	2.51153	TRUB1;MFSD14B;LMBR1;RSRC1;XRN2;PGK1
hsa-miR-8485	15/874	0.200549	0.406156	0	0	1.29743	2.08457	NUS1;CTBP2;PLEKHA3;DDB1;PPM1A;OCLN;LAMP2;ACOT2;RABL3;EIF4H;POT1;ADAM9;DSG2;ARL6IP6;LIN52
hsa-miR-4446-5p	5/231	0.201037	0.406156	0	0	1.63457	2.62229	TRUB1;SLC30A6;LMBRD2;RABL3;TWF1
hsa-miR-548x-3p	6/292	0.201272	0.406156	0	0	1.55109	2.48655	TRUB1;MFSD14B;LMBR1;RSRC1;XRN2;PGK1
hsa-miR-548ae-3p	6/292	0.201272	0.406156	0	0	1.55109	2.48655	TRUB1;MFSD14B;LMBR1;RSRC1;XRN2;PGK1
hsa-miR-548aq-3p	6/292	0.201272	0.406156	0	0	1.55109	2.48655	TRUB1;MFSD14B;LMBR1;RSRC1;XRN2;PGK1
hsa-miR-548aj-3p	6/292	0.201272	0.406156	0	0	1.55109	2.48655	TRUB1;MFSD14B;LMBR1;RSRC1;XRN2;PGK1
hsa-miR-4789-3p	6/292	0.201272	0.406156	0	0	1.55109	2.48655	DDB1;MORF4L2;ACOT2;PLEKHA3;SOS1;HNRNPA1L2
mmu-miR-467g	4/172	0.201804	0.406156	0	0	1.75768	2.81309	CASP8;CCDC138;TCTN3;B3GNT2
hsa-miR-6818-3p	4/172	0.201804	0.406156	0	0	1.75768	2.81309	NCKAP1;TPM3;AMD1;UBXN7
hsa-miR-548l	4/172	0.201804	0.406156	0	0	1.75768	2.81309	REST;ATP6V0E1;PAWR;FAM3C
hsa-miR-493-5p	3/115	0.201841	0.406156	0	0	1.9756	3.1615	RAB5C;UBE2G1;SF3B1
hsa-miR-4762-3p	3/115	0.201841	0.406156	0	0	1.9756	3.1615	FXR1;TWF1;LIN52
hsa-miR-6510-5p	3/115	0.201841	0.406156	0	0	1.9756	3.1615	TPM3;ARIH1;AIDA
hsa-miR-4793-3p	8/418	0.202747	0.406421	0	0	1.44443	2.30501	KLF10;RSRC1;KIF5B;PGM3;NUP35;PLEKHA3;GPATCH2L;AVL9
hsa-miR-4746-3p	1962-02-01	0.202924	0.406421	0	0	2.45581	3.91682	PRPF6;HM13
mmu-miR-291a-3p	1962-02-01	0.202924	0.406421	0	0	2.45581	3.91682	KIF5B;GABPB1
hsa-miR-4277	1962-02-01	0.202924	0.406421	0	0	2.45581	3.91682	G3BP2;PIK3CB
hsa-miR-4752	1962-02-01	0.202924	0.406421	0	0	2.45581	3.91682	REST;EIF4H
hsa-miR-3689d	7/355	0.202963	0.406421	0	0	1.48812	2.37316	TGIF1;SIKE1;RRM2;PLEKHB2;AMD1;HDLBP;AVL9
hsa-miR-3529-3p	3/116	0.2053	0.409367	0	0	1.95801	3.10009	ITGB1;SON;U2SURP
hsa-miR-4787-3p	2017-01-01	0.2057	0.409367	0	0	4.59771	7.27054	PRLR
hsa-miR-450a-5p	2017-01-01	0.2057	0.409367	0	0	4.59771	7.27054	HNRNPK
mmu-miR-3082-3p	2017-01-01	0.2057	0.409367	0	0	4.59771	7.27054	THAP1
hsa-miR-4444	2017-01-01	0.2057	0.409367	0	0	4.59771	7.27054	HNRNPA1L2
mmu-miR-873a-5p	2017-01-01	0.2057	0.409367	0	0	4.59771	7.27054	NDUFAF4
mmu-miR-499-5p	2017-01-01	0.2057	0.409367	0	0	4.59771	7.27054	MCL1
hsa-miR-4524b-3p	5/233	0.205764	0.409367	0	0	1.62007	2.56137	RABL3;NUP153;AVL9;GTF2H3;MAPK14
hsa-miR-6499-3p	15/880	0.20768	0.411107	0	0	1.28802	2.02445	KLF10;TGIF1;ATP6V0E1;PLEKHB2;CSNK2A1;TPM3;FEM1B;AMD1;SIKE1;SENP5;YME1L1;ALDOA;AVL9;SEC23B;LIN52
hsa-miR-499b-3p	1963-02-01	0.20784	0.411107	0	0	2.41542	3.7946	FEM1B;ACOT2
hsa-miR-4760-5p	1963-02-01	0.20784	0.411107	0	0	2.41542	3.7946	TWF1;ARL6IP6
hsa-miR-3679-5p	1963-02-01	0.20784	0.411107	0	0	2.41542	3.7946	CSNK2A1;KDM6A
hsa-miR-8061	1963-02-01	0.20784	0.411107	0	0	2.41542	3.7946	TWF1;ARL6IP6
hsa-miR-4639-5p	1963-02-01	0.20784	0.411107	0	0	2.41542	3.7946	FAM91A1;SF3B1
mmu-miR-302a-3p	1963-02-01	0.20784	0.411107	0	0	2.41542	3.7946	KIF5B;GABPB1
mmu-miR-466o-3p	5/234	0.208141	0.411107	0	0	1.61291	2.53153	ATF2;CASP8;CCDC138;B3GNT2;GABPB1
mmu-miR-466m-3p	5/234	0.208141	0.411107	0	0	1.61291	2.53153	ATF2;CASP8;CCDC138;B3GNT2;GABPB1
hsa-miR-5693	7/358	0.208645	0.411772	0	0	1.47517	2.31178	PLEKHB2;RBBP4;ERI2;YME1L1;AVL9;SEC23B;LIN52
mmu-miR-24-3p	7/359	0.210552	0.415204	0	0	1.47091	2.29171	MFSD14A;TMEM87B;LMBR1;GNAQ;GABPB1;AVL9;EIF4G2
hsa-miR-6134	7/360	0.212466	0.41794	0	0	1.46667	2.27183	TGIF1;AKIRIN1;SIKE1;PLEKHB2;TUBB;HDLBP;ACTG1
hsa-miR-499a-5p	1964-02-01	0.212768	0.41794	0	0	2.37634	3.67751	SIKE1;RAB5C
hsa-miR-3936	1964-02-01	0.212768	0.41794	0	0	2.37634	3.67751	SET;UBXN7
mmu-miR-669b-5p	1964-02-01	0.212768	0.41794	0	0	2.37634	3.67751	XRN2;WDR43
hsa-miR-4643	4/176	0.212958	0.41794	0	0	1.71645	2.65478	RNF168;PLEKHA3;SOS1;HNRNPA1L2
hsa-miR-483-3p	4/176	0.212958	0.41794	0	0	1.71645	2.65478	RAB5C;CAPRIN1;PGM3;ALDOA
hsa-miR-619-5p	8/425	0.214991	0.421596	0	0	1.41966	2.18225	AKIRIN1;MFN1;PGK1;WDR53;CACYBP;ALDOA;GTF2H3;THAP1
hsa-miR-7152-5p	3/119	0.215755	0.422455	0	0	1.90708	2.92472	PSMC1;SPRTN;DCK
hsa-miR-4716-5p	4/177	0.215773	0.422455	0	0	1.70645	2.61688	DYRK1A;GMPS;YME1L1;GTF2H3
mmu-miR-876-3p	2018-01-01	0.216392	0.422995	0	0	4.32704	6.62324	THAP1
mmu-miR-212-3p	2018-01-01	0.216392	0.422995	0	0	4.32704	6.62324	STAMBP
hsa-miR-4296	1965-02-01	0.217708	0.424221	0	0	2.33851	3.56529	RAB5C;RNF4
hsa-miR-3659	1965-02-01	0.217708	0.424221	0	0	2.33851	3.56529	MFSD14A;PPM1A
hsa-miR-3908	1965-02-01	0.217708	0.424221	0	0	2.33851	3.56529	TGIF1;RBBP4
hsa-miR-4318	1965-02-01	0.217708	0.424221	0	0	2.33851	3.56529	ALDOA;SRP9
hsa-miR-548s	8/427	0.218541	0.425282	0	0	1.41274	2.14847	ISY1;RBBP4;ANAPC7;TPM3;KIF5B;GMPS;YME1L1;THAP1
hsa-miR-6089	4/178	0.218598	0.425282	0	0	1.69655	2.57964	AMD1;GMPS;EIF4H;YME1L1
hsa-miR-127-5p	3/120	0.219266	0.425908	0	0	1.89069	2.86907	RRM2;FBXO7;SF3B1
hsa-miR-3622b-3p	3/120	0.219266	0.425908	0	0	1.89069	2.86907	SIKE1;ALDOA;THAP1
hsa-miR-5088-5p	1966-02-01	0.222658	0.429699	0	0	2.30185	3.45765	RAB5C;ACOT2
hsa-miR-3152-3p	1966-02-01	0.222658	0.429699	0	0	2.30185	3.45765	EEA1;LAMP2
hsa-miR-4704-3p	1966-02-01	0.222658	0.429699	0	0	2.30185	3.45765	FXR1;CASP8
hsa-miR-4265	1966-02-01	0.222658	0.429699	0	0	2.30185	3.45765	RAB5C;RNF4
hsa-miR-7108-5p	1966-02-01	0.222658	0.429699	0	0	2.30185	3.45765	SLC39A9;FIGNL1
hsa-miR-15b-3p	1966-02-01	0.222658	0.429699	0	0	2.30185	3.45765	SLC30A6;PLEKHA3
hsa-miR-4322	1966-02-01	0.222658	0.429699	0	0	2.30185	3.45765	RAB5C;RNF4
mmu-miR-669c-3p	3/121	0.222788	0.429699	0	0	1.87457	2.81474	PARG;MEMO1;ARMC8
hsa-miR-3157-5p	3/121	0.222788	0.429699	0	0	1.87457	2.81474	DYRK1A;ALDOA;SOS1
hsa-miR-4735-5p	4/180	0.224279	0.432237	0	0	1.6771	2.50704	MFSD14A;LMBRD2;MAPK14;MAP2K6
hsa-miR-6504-3p	7/367	0.22604	0.43291	0	0	1.43763	2.13782	FXR1;DDX47;WDR53;CACYBP;GTF2H3;LSM3;EIF4G2
hsa-miR-215-3p	3/122	0.226321	0.43291	0	0	1.85872	2.76169	DSG2;MAPK14;STRN3
hsa-miR-6081	3/122	0.226321	0.43291	0	0	1.85872	2.76169	TPM3;UBE2D3;AVL9
hsa-miR-1263	2019-01-01	0.226941	0.43291	0	0	4.08644	6.06046	MRS2
mmu-miR-182-5p	2019-01-01	0.226941	0.43291	0	0	4.08644	6.06046	CTBP2
mmu-miR-291b-5p	2019-01-01	0.226941	0.43291	0	0	4.08644	6.06046	HIPK3
mmu-miR-199a-3p	2019-01-01	0.226941	0.43291	0	0	4.08644	6.06046	SMAD1
mmu-miR-871-5p	2019-01-01	0.226941	0.43291	0	0	4.08644	6.06046	PGM3
hsa-miR-4445-3p	2019-01-01	0.226941	0.43291	0	0	4.08644	6.06046	EIF4G2
mmu-miR-1928	2019-01-01	0.226941	0.43291	0	0	4.08644	6.06046	GABPB1
mmu-miR-291a-5p	2019-01-01	0.226941	0.43291	0	0	4.08644	6.06046	HIPK3
hsa-miR-5091	2019-01-01	0.226941	0.43291	0	0	4.08644	6.06046	ATP6V0E1
hsa-miR-499a-3p	1967-02-01	0.227616	0.43291	0	0	2.26632	3.35437	FEM1B;ACOT2
hsa-miR-486-5p	1967-02-01	0.227616	0.43291	0	0	2.26632	3.35437	G3BP2;SPRTN
hsa-miR-4699-5p	1967-02-01	0.227616	0.43291	0	0	2.26632	3.35437	EIF4H;G3BP2
hsa-miR-1180-3p	1967-02-01	0.227616	0.43291	0	0	2.26632	3.35437	TUBB;ACTG1
hsa-miR-129-1-3p	1967-02-01	0.227616	0.43291	0	0	2.26632	3.35437	ALDOA;SRP9
mmu-miR-466i-3p	7/368	0.228003	0.433312	0	0	1.43357	2.11938	SET;SGMS1;TPM3;DCUN1D1;B3GNT2;ARMC8;GABPB1
hsa-miR-6742-3p	6/305	0.228935	0.434413	0	0	1.48266	2.18591	NCKAP1;FEM1B;PGAM1;AMD1;PGK1;GABPB1
hsa-miR-3926	6/305	0.228935	0.434413	0	0	1.48266	2.18591	ANAPC7;TPM3;TMEM237;TMEM67;KIF5B;STRN3
hsa-miR-3622a-3p	3/123	0.229865	0.43442	0	0	1.84314	2.7099	SIKE1;ALDOA;THAP1
hsa-miR-6869-5p	3/123	0.229865	0.43442	0	0	1.84314	2.7099	TUBB;PAWR;ALDOA
hsa-miR-4691-3p	3/123	0.229865	0.43442	0	0	1.84314	2.7099	SLC39A9;ALDOA;SOS1
mmu-miR-3065-5p	3/123	0.229865	0.43442	0	0	1.84314	2.7099	FUBP3;DCUN1D1;DCK
hsa-miR-6811-3p	4/182	0.229998	0.43442	0	0	1.65809	2.43687	CAPN7;PSMC4;UBQLN1;AVL9
hsa-miR-6895-3p	4/182	0.229998	0.43442	0	0	1.65809	2.43687	NCKAP1;TPM3;AMD1;UBXN7
hsa-miR-6868-5p	1968-02-01	0.232582	0.43664	0	0	2.23187	3.25521	AMD1;HDLBP
mmu-miR-5102	1968-02-01	0.232582	0.43664	0	0	2.23187	3.25521	UBR1;ARL6IP6
hsa-miR-3591-3p	1968-02-01	0.232582	0.43664	0	0	2.23187	3.25521	SMAD1;SON
hsa-miR-921	1968-02-01	0.232582	0.43664	0	0	2.23187	3.25521	MFSD14A;SNRPA1
hsa-miR-6733-3p	1968-02-01	0.232582	0.43664	0	0	2.23187	3.25521	FEM1B;PGAM1
hsa-miR-6730-3p	1968-02-01	0.232582	0.43664	0	0	2.23187	3.25521	TMEM67;KDM6A
hsa-miR-6862-5p	1968-02-01	0.232582	0.43664	0	0	2.23187	3.25521	DDX47;KIF5B
hsa-miR-1909-3p	4/183	0.232871	0.43664	0	0	1.64874	2.40266	SENP5;NUP35;PDIA6;MCL1
mmu-miR-124-3p	8/435	0.232957	0.43664	0	0	1.3857	2.01883	PLEKHF2;ITGB1;ATP6V0E1;SGMS1;GNAQ;STAMBP;MAPK14;HIPK3
hsa-miR-4292	3/124	0.233419	0.43664	0	0	1.82781	2.65932	PRDX3;ITGB1;FAM3C
hsa-miR-656-3p	3/124	0.233419	0.43664	0	0	1.82781	2.65932	RAB5C;SCAMP1;SRP9
hsa-miR-548an	3/124	0.233419	0.43664	0	0	1.82781	2.65932	ATP6V0E1;FAM91A1;SOS1
hsa-miR-627-3p	6/308	0.235488	0.43664	0	0	1.46771	2.12244	PLSCR1;LMBRD2;YWHAB;UBE2V1;ALDOA;MAP2K6
hsa-miR-3927-3p	4/184	0.235753	0.43664	0	0	1.6395	2.36903	FXR1;RBM18;AMD1;EIF4G2
hsa-miR-5089-5p	7/372	0.235916	0.43664	0	0	1.41757	2.04736	AKIRIN1;STAU1;MFN1;WDR53;CACYBP;ALDOA;GTF2H3
hsa-miR-4480	3/125	0.236984	0.43664	0	0	1.81274	2.60992	FXR1;TCEA1;PDIA6
hsa-miR-4740-3p	3/125	0.236984	0.43664	0	0	1.81274	2.60992	HM13;GMPS;CKS1B
mmu-miR-450b-3p	2020-01-01	0.237349	0.43664	0	0	3.87117	5.56761	PRLR
mmu-miR-875-5p	2020-01-01	0.237349	0.43664	0	0	3.87117	5.56761	PRDX3
hsa-miR-487b-3p	2020-01-01	0.237349	0.43664	0	0	3.87117	5.56761	PRELID3B
mmu-miR-1953	2020-01-01	0.237349	0.43664	0	0	3.87117	5.56761	UBE2G1
mmu-miR-26b-5p	2020-01-01	0.237349	0.43664	0	0	3.87117	5.56761	NUS1
hsa-miR-4661-5p	2020-01-01	0.237349	0.43664	0	0	3.87117	5.56761	FIGNL1
hsa-miR-3186-5p	2020-01-01	0.237349	0.43664	0	0	3.87117	5.56761	MFN1
mmu-miR-212-5p	2020-01-01	0.237349	0.43664	0	0	3.87117	5.56761	GABPB1
hsa-miR-501-3p	1969-02-01	0.237555	0.43664	0	0	2.19845	3.15995	SMIM13;PLEKHB2
hsa-miR-3064-3p	1969-02-01	0.237555	0.43664	0	0	2.19845	3.15995	DYNC2LI1;MAPK14
hsa-miR-7106-3p	1969-02-01	0.237555	0.43664	0	0	2.19845	3.15995	HDLBP;HIPK3
mmu-miR-105	1969-02-01	0.237555	0.43664	0	0	2.19845	3.15995	KIF5B;GABPB1
hsa-miR-4744	1969-02-01	0.237555	0.43664	0	0	2.19845	3.15995	PGK1;GABPA
hsa-miR-4679	1969-02-01	0.237555	0.43664	0	0	2.19845	3.15995	CTBP2;YME1L1
hsa-miR-675-5p	1969-02-01	0.237555	0.43664	0	0	2.19845	3.15995	ATP6V0E1;PRPF6
hsa-miR-4253	1969-02-01	0.237555	0.43664	0	0	2.19845	3.15995	DDX47;KIF5B
hsa-miR-3128	1969-02-01	0.237555	0.43664	0	0	2.19845	3.15995	AMD1;SPRTN
hsa-miR-6839-3p	1969-02-01	0.237555	0.43664	0	0	2.19845	3.15995	NFYA;HM13
hsa-miR-513b-3p	1969-02-01	0.237555	0.43664	0	0	2.19845	3.15995	RSRC1;DCK
hsa-miR-939-3p	8/438	0.238449	0.437956	0	0	1.37582	1.97237	KLF10;NCKAP1;FEM1B;FIGNL1;PGAM1;KIF5B;PLEKHA3;AVL9
hsa-miR-6783-5p	4/185	0.238643	0.437987	0	0	1.63036	2.33595	BTBD1;UBE2D3;GABPA;MCL1
hsa-miR-125a-3p	6/310	0.239889	0.43965	0	0	1.4579	2.08127	FXR1;PLSCR1;PGK1;NUP153;MAPK14;ALDOA
hsa-miR-4731-5p	7/374	0.239907	0.43965	0	0	1.4097	2.01235	ISY1;MFN1;WDR53;CENPO;GTF2H3;HS6ST1;LSM3
hsa-miR-365b-5p	3/126	0.240557	0.440515	0	0	1.79791	2.56165	TPM3;GMPS;SF3B1
hsa-miR-6831-5p	4/186	0.241542	0.441334	0	0	1.62131	2.30342	FXR1;RBM18;AMD1;EIF4G2
hsa-miR-200b-3p	4/186	0.241542	0.441334	0	0	1.62131	2.30342	NGRN;NCOA2;TUBB;MATR3
hsa-miR-519e-5p	4/186	0.241542	0.441334	0	0	1.62131	2.30342	TMTC3;GMPS;GPATCH2L;PEX13
hsa-miR-5582-3p	5/248	0.242304	0.441507	0	0	1.51889	2.15312	TRUB1;MFSD14B;PGK1;RNPS1;PRLR
hsa-miR-876-3p	1970-02-01	0.242533	0.441507	0	0	2.16601	3.0684	SGMS1;MCL1
hsa-miR-3144-5p	1970-02-01	0.242533	0.441507	0	0	2.16601	3.0684	PGAM1;UBE2V1
hsa-miR-1266-3p	1970-02-01	0.242533	0.441507	0	0	2.16601	3.0684	CSNK2A1;ANAPC1
hsa-miR-3668	1970-02-01	0.242533	0.441507	0	0	2.16601	3.0684	TMTC3;SRP9
mmu-miR-466n-3p	3/127	0.24414	0.443449	0	0	1.78332	2.5145	CCDC138;SGMS1;TCTN3
hsa-miR-6791-5p	3/127	0.24414	0.443449	0	0	1.78332	2.5145	PRDX3;ITGB1;FAM3C
hsa-miR-3692-3p	3/127	0.24414	0.443449	0	0	1.78332	2.5145	TGIF1;PAWR;GABPA
hsa-miR-3606-3p	4/187	0.244449	0.443683	0	0	1.61237	2.27143	NEDD1;YWHAB;TWF1;C16ORF87
hsa-miR-603	9/508	0.246393	0.44505	0	0	1.33411	1.86886	DDB1;NUS1;PPM1A;OCLN;POT1;ADAM9;DSG2;ARL6IP6;LIN52
hsa-miR-6880-5p	6/313	0.246536	0.44505	0	0	1.44343	2.02116	TGIF1;SIKE1;RAB5C;CAPN7;DYRK1A;UBE2V1
hsa-miR-4537	6/313	0.246536	0.44505	0	0	1.44343	2.02116	NCKAP1;SENP5;TPM3;LAMP2;AMD1;AVL9
hsa-miR-6745	4/188	0.247364	0.44505	0	0	1.60353	2.23996	RAB5C;TPM3;YME1L1;RNPS1
hsa-miR-6512-5p	1971-02-01	0.247516	0.44505	0	0	2.13451	2.98037	TMTC3;PAWR
hsa-miR-892b	1971-02-01	0.247516	0.44505	0	0	2.13451	2.98037	SPRTN;MCL1
hsa-miR-299-3p	1971-02-01	0.247516	0.44505	0	0	2.13451	2.98037	OCLN;FIGNL1
hsa-miR-5586-5p	1971-02-01	0.247516	0.44505	0	0	2.13451	2.98037	GMPS;PAWR
hsa-miR-129-2-3p	1971-02-01	0.247516	0.44505	0	0	2.13451	2.98037	ALDOA;SRP9
hsa-miR-634	1971-02-01	0.247516	0.44505	0	0	2.13451	2.98037	TSNAX;SLC39A9
mmu-miR-669d-5p	2021-01-01	0.247617	0.44505	0	0	3.67743	5.13322	MCL1
mmu-miR-429-3p	2021-01-01	0.247617	0.44505	0	0	3.67743	5.13322	SENP5
hsa-miR-365a-5p	3/128	0.247732	0.44505	0	0	1.76896	2.46843	TPM3;GMPS;SF3B1
hsa-miR-3120-3p	3/128	0.247732	0.44505	0	0	1.76896	2.46843	IPPK;NCOA2;ZNF567
hsa-miR-515-5p	4/189	0.250287	0.449312	0	0	1.59478	2.20901	TMTC3;GMPS;GPATCH2L;PEX13
hsa-miR-3692-5p	1972-02-01	0.252502	0.449684	0	0	2.10391	2.89568	GPR89A;GPR89B
hsa-miR-7843-3p	1972-02-01	0.252502	0.449684	0	0	2.10391	2.89568	RRM2;TPM3
hsa-miR-3191-3p	1972-02-01	0.252502	0.449684	0	0	2.10391	2.89568	PGAM1;UBE2V1
hsa-miR-6822-5p	1972-02-01	0.252502	0.449684	0	0	2.10391	2.89568	NCOA2;TUBB
hsa-miR-3660	1972-02-01	0.252502	0.449684	0	0	2.10391	2.89568	EIF4H;KDM6A
hsa-miR-4436a	1972-02-01	0.252502	0.449684	0	0	2.10391	2.89568	MFSD14B;MORF4L2
hsa-miR-5000-3p	1972-02-01	0.252502	0.449684	0	0	2.10391	2.89568	MFSD14B;MORF4L2
hsa-miR-876-5p	1972-02-01	0.252502	0.449684	0	0	2.10391	2.89568	PRDX3;HSPD1
mmu-miR-1264-3p	1972-02-01	0.252502	0.449684	0	0	2.10391	2.89568	RNF168;CHMP5
hsa-miR-6750-5p	1972-02-01	0.252502	0.449684	0	0	2.10391	2.89568	NCOA2;TUBB
hsa-miR-5002-5p	1972-02-01	0.252502	0.449684	0	0	2.10391	2.89568	SMIM13;RAB5C
mmu-miR-1896	4/190	0.253217	0.45063	0	0	1.58612	2.17856	CASP8;ACOT2;AIDA;GABPB1
hsa-miR-4723-5p	5/253	0.254859	0.452898	0	0	1.48789	2.03401	RSRC1;PLEKHA3;ARIH1;UBE2V1;SENP2
hsa-miR-4789-5p	5/253	0.254859	0.452898	0	0	1.48789	2.03401	CCT6A;PGGT1B;PLEKHA3;DSG2;SOS1
hsa-miR-6516-5p	11/647	0.255827	0.454099	0	0	1.28008	1.74507	CCT6A;TGIF1;PLEKHF2;SIKE1;ATP6V0E1;SENP5;MIER3;TPM3;AMD1;ALDOA;AVL9
hsa-miR-363-5p	4/191	0.256154	0.454099	0	0	1.57756	2.1486	RAB5C;TPM3;YME1L1;RNPS1
hsa-miR-4725-5p	1973-02-01	0.257491	0.454099	0	0	2.07417	2.81417	IPPK;UBE2G1
hsa-miR-4289	1973-02-01	0.257491	0.454099	0	0	2.07417	2.81417	SON;CTBP1
hsa-miR-4526	1973-02-01	0.257491	0.454099	0	0	2.07417	2.81417	EIF4H;KDM6A
hsa-miR-3167	1973-02-01	0.257491	0.454099	0	0	2.07417	2.81417	PRDX3;HSPD1
mmu-miR-205-5p	2022-01-01	0.257747	0.454099	0	0	3.50213	4.74811	YME1L1
hsa-miR-1282	2022-01-01	0.257747	0.454099	0	0	3.50213	4.74811	PGM3
mmu-miR-3074-2-3p	2022-01-01	0.257747	0.454099	0	0	3.50213	4.74811	G3BP2
mmu-miR-3066-5p	2022-01-01	0.257747	0.454099	0	0	3.50213	4.74811	YME1L1
hsa-miR-125b-1-3p	2022-01-01	0.257747	0.454099	0	0	3.50213	4.74811	SGMS1
mmu-miR-325-3p	2022-01-01	0.257747	0.454099	0	0	3.50213	4.74811	SET
hsa-miR-488-3p	3/131	0.258553	0.455194	0	0	1.72724	2.33635	TPM3;TUBB;TWF1
hsa-miR-2276-5p	4/192	0.259098	0.455827	0	0	1.56909	2.11913	MRS2;ATP6V0E1;RRM2;MAPK14
hsa-miR-6870-5p	5/255	0.259925	0.456956	0	0	1.47583	1.98848	RSRC1;PLEKHA3;ARIH1;UBE2V1;SENP2
hsa-miR-4461	1974-02-01	0.262481	0.459156	0	0	2.04526	2.73569	PLEKHF2;PAWR
hsa-miR-502-5p	1974-02-01	0.262481	0.459156	0	0	2.04526	2.73569	NFYA;SRP9
hsa-miR-122-3p	1974-02-01	0.262481	0.459156	0	0	2.04526	2.73569	AMD1;CKS1B
hsa-miR-6812-3p	1974-02-01	0.262481	0.459156	0	0	2.04526	2.73569	POLR2D;ALDOA
hsa-miR-6508-3p	1974-02-01	0.262481	0.459156	0	0	2.04526	2.73569	TMEM67;CCT7
hsa-miR-6796-5p	1974-02-01	0.262481	0.459156	0	0	2.04526	2.73569	RAB5C;RNF4
hsa-miR-4682	1974-02-01	0.262481	0.459156	0	0	2.04526	2.73569	PIK3CB;HNRNPA1L2
hsa-miR-30a-3p	4/194	0.265006	0.463243	0	0	1.55241	2.06161	MORC3;STAU1;RSRC1;DYRK1A
hsa-miR-99a-5p	3/133	0.265803	0.46342	0	0	1.70049	2.25315	PPM1A;PLSCR1;GTF2I
hsa-miR-3672	6/322	0.266786	0.46342	0	0	1.40167	1.85204	KLF10;RBBP4;UBE2D3;POLR2D;MAPK14;STRN3
hsa-miR-6791-3p	6/322	0.266786	0.46342	0	0	1.40167	1.85204	NCKAP1;ACOT2;MFN1;UBXN7;ALDOA;MCL1
hsa-miR-6829-3p	6/322	0.266786	0.46342	0	0	1.40167	1.85204	NCKAP1;ACOT2;MFN1;UBXN7;ALDOA;MCL1
hsa-miR-6864-3p	6/322	0.266786	0.46342	0	0	1.40167	1.85204	KLF10;RBBP4;UBE2D3;POLR2D;MAPK14;STRN3
hsa-miR-6830-5p	1975-02-01	0.267472	0.46342	0	0	2.01714	2.66008	SMIM13;PIK3CB
hsa-miR-374a-3p	1975-02-01	0.267472	0.46342	0	0	2.01714	2.66008	SET;EIF4H
hsa-miR-6829-5p	1975-02-01	0.267472	0.46342	0	0	2.01714	2.66008	SENP2;RNF4
hsa-miR-452-5p	1975-02-01	0.267472	0.46342	0	0	2.01714	2.66008	EGLN1;REST
hsa-miR-2054	1975-02-01	0.267472	0.46342	0	0	2.01714	2.66008	SIKE1;KIF5B
hsa-miR-7111-5p	5/258	0.267569	0.46342	0	0	1.45811	1.92234	RSRC1;PLEKHA3;ARIH1;UBE2V1;SENP2
hsa-miR-187-3p	2023-01-01	0.267741	0.46342	0	0	3.34277	4.40489	HIPK3
mmu-miR-532-3p	2023-01-01	0.267741	0.46342	0	0	3.34277	4.40489	EIF4G2
mmu-miR-222-3p	2023-01-01	0.267741	0.46342	0	0	3.34277	4.40489	GABPB1
hsa-miR-558	4/196	0.270939	0.468625	0	0	1.53608	2.00591	PRIM2;ATP6V0E1;RNPS1;HS6ST1
hsa-miR-106b-3p	1976-02-01	0.272462	0.470122	0	0	1.98978	2.58722	HNRNPK;NUP153
hsa-miR-6815-5p	1976-02-01	0.272462	0.470122	0	0	1.98978	2.58722	PLEKHB2;MEMO1
hsa-miR-1279	1976-02-01	0.272462	0.470122	0	0	1.98978	2.58722	DYNC2LI1;SCAMP1
hsa-miR-6506-5p	7/390	0.272567	0.470122	0	0	1.34969	1.75442	AKIRIN1;MFN1;PGK1;WDR53;ALDOA;GTF2H3;THAP1
hsa-miR-3942-3p	3/135	0.273077	0.470342	0	0	1.67456	2.17358	CCT6A;MATR3;ARL6IP6
hsa-miR-6887-5p	3/135	0.273077	0.470342	0	0	1.67456	2.17358	SON;EIF4H;SENP2
hsa-miR-629-3p	4/197	0.273914	0.471125	0	0	1.52805	1.97873	NCKAP1;TMEM87B;GPATCH2L;MAPK14
hsa-miR-3160-3p	4/197	0.273914	0.471125	0	0	1.52805	1.97873	PRIM2;ATP6V0E1;RNPS1;HS6ST1
hsa-miR-141-5p	3/136	0.276722	0.472844	0	0	1.66188	2.13509	INTS14;CAPRIN1;ZBTB26
hsa-miR-512-5p	3/136	0.276722	0.472844	0	0	1.66188	2.13509	SPRTN;ARIH1;MCL1
hsa-miR-1292-3p	3/136	0.276722	0.472844	0	0	1.66188	2.13509	RSRC1;GMPS;PLEKHA3
hsa-miR-6769a-3p	1977-02-01	0.277452	0.472844	0	0	1.96315	2.51697	REST;MAP2K6
hsa-miR-6865-5p	1977-02-01	0.277452	0.472844	0	0	1.96315	2.51697	PLEKHB2;MEMO1
hsa-miR-4662a-3p	1977-02-01	0.277452	0.472844	0	0	1.96315	2.51697	ZFAND6;UBQLN1
hsa-miR-380-3p	1977-02-01	0.277452	0.472844	0	0	1.96315	2.51697	SIKE1;SGMS1
hsa-miR-4722-5p	10/593	0.277555	0.472844	0	0	1.2681	1.62537	SLC30A6;MFSD14B;SIKE1;ATP6V0E1;CASP8;PSMC4;TPM3;ACOT2;HDLBP;THAP1
mmu-miR-29c-3p	2024-01-01	0.277601	0.472844	0	0	3.19727	4.09753	MCL1
hsa-miR-3923	2024-01-01	0.277601	0.472844	0	0	3.19727	4.09753	AVL9
mmu-miR-22-3p	2024-01-01	0.277601	0.472844	0	0	3.19727	4.09753	SCAMP1
mmu-miR-1954	2024-01-01	0.277601	0.472844	0	0	3.19727	4.09753	SENP5
mmu-miR-207	2024-01-01	0.277601	0.472844	0	0	3.19727	4.09753	PRLR
hsa-miR-381-5p	2024-01-01	0.277601	0.472844	0	0	3.19727	4.09753	RALGAPB
hsa-miR-1273e	8/459	0.278043	0.473269	0	0	1.31033	1.67719	TGIF1;NCKAP1;SIKE1;ATP6V0E1;RRM2;AMD1;AVL9;PRLR
hsa-miR-4428	3/137	0.280372	0.476574	0	0	1.64939	2.09743	TPM3;EIF4H;UBE2G1
hsa-miR-6715b-5p	3/137	0.280372	0.476574	0	0	1.64939	2.09743	YWHAB;GMPS;C16ORF87
hsa-miR-4283	1978-02-01	0.282439	0.478108	0	0	1.93722	2.44921	HS6ST1;U2SURP
hsa-miR-3145-5p	1978-02-01	0.282439	0.478108	0	0	1.93722	2.44921	LMBR1;ALDOA
hsa-miR-4732-5p	1978-02-01	0.282439	0.478108	0	0	1.93722	2.44921	NCBP2;TUBB
mmu-miR-122-5p	1978-02-01	0.282439	0.478108	0	0	1.93722	2.44921	ALDOA;THAP1
hsa-miR-6511a-3p	1978-02-01	0.282439	0.478108	0	0	1.93722	2.44921	HNRNPK;GABPB1
hsa-miR-4429	1978-02-01	0.282439	0.478108	0	0	1.93722	2.44921	CKS1B;MCL1
hsa-miR-4726-3p	4/200	0.282873	0.478514	0	0	1.50443	1.89973	RABL3;UBXN7;SCAMP1;ALDOA
hsa-miR-4269	3/138	0.284026	0.479806	0	0	1.63709	2.06059	YWHAB;GMPS;C16ORF87
hsa-miR-4756-3p	3/138	0.284026	0.479806	0	0	1.63709	2.06059	RSRC1;B3GNT2;PDIA6
hsa-miR-377-3p	5/265	0.285593	0.480273	0	0	1.41834	1.77745	PPM1A;LAMP2;TWF1;PLEKHA3;MAT2B
hsa-miR-30b-3p	11/666	0.28602	0.480273	0	0	1.24171	1.55424	PRIM2;SENP5;PLEKHB2;RBBP4;MIER3;CAPN7;YWHAB;PGAM1;YME1L1;RNPS1;ALDOA
hsa-miR-4430	7/397	0.287218	0.480273	0	0	1.32499	1.65294	YWHAB;HM13;POLR2D;YME1L1;CENPO;SEC23B;LIN52
hsa-miR-3652	7/397	0.287218	0.480273	0	0	1.32499	1.65294	YWHAB;HM13;POLR2D;YME1L1;CENPO;SEC23B;LIN52
mmu-miR-142a-5p	2025-01-01	0.287329	0.480273	0	0	3.0639	3.82107	MEMO1
hsa-miR-4798-3p	2025-01-01	0.287329	0.480273	0	0	3.0639	3.82107	PRPF6
hsa-miR-191-3p	2025-01-01	0.287329	0.480273	0	0	3.0639	3.82107	GABPB1
hsa-miR-5739	2025-01-01	0.287329	0.480273	0	0	3.0639	3.82107	ATP6V0E1
mmu-miR-1907	2025-01-01	0.287329	0.480273	0	0	3.0639	3.82107	RNF168
mmu-miR-1955-3p	2025-01-01	0.287329	0.480273	0	0	3.0639	3.82107	PRLR
hsa-miR-3942-5p	1979-02-01	0.287423	0.480273	0	0	1.91196	2.38383	TGIF1;RBBP4
hsa-miR-1245b-3p	1979-02-01	0.287423	0.480273	0	0	1.91196	2.38383	UBE2D3;MATR3
hsa-miR-6511b-3p	1979-02-01	0.287423	0.480273	0	0	1.91196	2.38383	HNRNPK;GABPB1
hsa-miR-7156-5p	1979-02-01	0.287423	0.480273	0	0	1.91196	2.38383	AKIRIN1;STAMBP
hsa-miR-3129-5p	1979-02-01	0.287423	0.480273	0	0	1.91196	2.38383	SLC30A6;UBE2V1
hsa-miR-320d	1979-02-01	0.287423	0.480273	0	0	1.91196	2.38383	CKS1B;MCL1
hsa-miR-640	4/202	0.28887	0.482365	0	0	1.48908	1.8491	PLSCR1;RBBP4;ARIH1;ALDOA
hsa-miR-544b	4/203	0.291876	0.485958	0	0	1.48152	1.82438	NCKAP1;CTBP1;TUBB;UBE2D3
hsa-miR-217	1980-02-01	0.292403	0.485958	0	0	1.88735	2.32073	FXR1;TMEM67
hsa-miR-593-5p	1980-02-01	0.292403	0.485958	0	0	1.88735	2.32073	AVL9;C16ORF87
hsa-miR-4273	1980-02-01	0.292403	0.485958	0	0	1.88735	2.32073	AKIRIN1;STAMBP
hsa-miR-4433b-5p	1980-02-01	0.292403	0.485958	0	0	1.88735	2.32073	RSRC1;PGK1
hsa-miR-6757-3p	1980-02-01	0.292403	0.485958	0	0	1.88735	2.32073	STAMBP;MAPK14
hsa-miR-4660	1980-02-01	0.292403	0.485958	0	0	1.88735	2.32073	MRS2;REST
hsa-miR-6892-3p	4/204	0.294886	0.489304	0	0	1.47404	1.80005	MRS2;ATP6V0E1;MAPK14;HIPK3
hsa-miR-4486	3/141	0.295012	0.489304	0	0	1.60126	1.95472	OCLN;KIF5B;PLEKHA3
hsa-miR-4708-5p	3/141	0.295012	0.489304	0	0	1.60126	1.95472	NCKAP1;ATP6V0E1;THAP1
mmu-miR-669i	2026-01-01	0.296927	0.490497	0	0	2.94119	3.5714	ZNF567
hsa-miR-323b-5p	2026-01-01	0.296927	0.490497	0	0	2.94119	3.5714	RRM2
hsa-miR-4785	2026-01-01	0.296927	0.490497	0	0	2.94119	3.5714	FAM3C
mmu-miR-452-3p	2026-01-01	0.296927	0.490497	0	0	2.94119	3.5714	STAMBP
mmu-miR-669j	2026-01-01	0.296927	0.490497	0	0	2.94119	3.5714	ZNF567
hsa-miR-659-5p	2026-01-01	0.296927	0.490497	0	0	2.94119	3.5714	AKIRIN1
hsa-miR-4703-5p	1981-02-01	0.297379	0.490586	0	0	1.86337	2.25979	TGIF1;RBBP4
hsa-miR-4717-5p	1981-02-01	0.297379	0.490586	0	0	1.86337	2.25979	PLSCR1;OCLN
mmu-miR-17-5p	7/402	0.297797	0.490787	0	0	1.30788	1.58429	KLF10;EGLN1;ATF2;ADAM10;MAPK14;FAM91A1;MCL1
hsa-miR-219b-3p	4/205	0.297899	0.490787	0	0	1.46663	1.77609	NCKAP1;ATP6V0E1;RRM2;AVL9
hsa-miR-412-3p	3/142	0.298681	0.491417	0	0	1.58966	1.92091	DYNC2LI1;SON;SLC3A2
hsa-miR-5584-5p	3/142	0.298681	0.491417	0	0	1.58966	1.92091	SLC39A9;UBXN7;ARIH1
hsa-miR-887-5p	8/470	0.29947	0.492386	0	0	1.2784	1.54142	ISY1;PRIM2;PLEKHB2;RBBP4;MIER3;CAPN7;YWHAB;YME1L1
hsa-miR-148b-3p	7/403	0.299923	0.492802	0	0	1.3045	1.57092	CCT6A;FXR1;CSNK2A1;YWHAB;UBE2D3;CCNC;DCK
hsa-miR-199b-3p	1982-02-01	0.30235	0.496131	0	0	1.83998	2.20093	SLC30A6;UBE2V1
hsa-miR-483-5p	3/143	0.302352	0.496131	0	0	1.57822	1.88781	NCBP2;PGAM1;THAP1
hsa-miR-1237-3p	3/144	0.306025	0.499284	0	0	1.56695	1.85541	CSNK2A1;PEX13;ANAPC1
hsa-miR-3170	3/144	0.306025	0.499284	0	0	1.56695	1.85541	ISY1;RAB5C;GMPS
hsa-miR-6855-5p	3/144	0.306025	0.499284	0	0	1.56695	1.85541	ISY1;RAB5C;GMPS
mmu-miR-221-3p	2027-01-01	0.306395	0.499284	0	0	2.82793	3.3451	GABPB1
hsa-miR-563	2027-01-01	0.306395	0.499284	0	0	2.82793	3.3451	TMEM67
mmu-miR-448-3p	2027-01-01	0.306395	0.499284	0	0	2.82793	3.3451	ZNF567
mmu-miR-322-5p	2027-01-01	0.306395	0.499284	0	0	2.82793	3.3451	RNF168
hsa-miR-410-5p	2027-01-01	0.306395	0.499284	0	0	2.82793	3.3451	RRM2
hsa-miR-1249-5p	5/273	0.306459	0.499284	0	0	1.37544	1.62669	TUBB;UBE2D3;HDLBP;UBE2V1;SENP2
hsa-miR-187-5p	1983-02-01	0.307314	0.499284	0	0	1.81717	2.14405	RNPS1;RNF4
hsa-miR-5195-3p	1983-02-01	0.307314	0.499284	0	0	1.81717	2.14405	TPM3;RBM18
hsa-miR-3130-3p	1983-02-01	0.307314	0.499284	0	0	1.81717	2.14405	GNAQ;GPATCH2L
hsa-miR-4437	1983-02-01	0.307314	0.499284	0	0	1.81717	2.14405	RAB5C;ACOT2
hsa-miR-5087	1983-02-01	0.307314	0.499284	0	0	1.81717	2.14405	FEM1B;UBE2V1
hsa-miR-6728-5p	1983-02-01	0.307314	0.499284	0	0	1.81717	2.14405	STAU1;CACYBP
hsa-miR-320b	3/145	0.3097	0.502829	0	0	1.55584	1.82367	TUBB;MCL1;CKS1B
hsa-miR-508-5p	8/476	0.311318	0.504014	0	0	1.26162	1.47223	KLF10;RSRC1;KIF5B;AMD1;ACOT2;NUP35;ALDOA;AVL9
hsa-miR-516b-5p	1984-02-01	0.312272	0.504014	0	0	1.79492	2.08907	TMTC3;B3GNT2
hsa-miR-1207-3p	1984-02-01	0.312272	0.504014	0	0	1.79492	2.08907	AKIRIN1;PIK3CB
hsa-miR-1295b-3p	1984-02-01	0.312272	0.504014	0	0	1.79492	2.08907	PLSCR1;MFN1
hsa-miR-6074	1984-02-01	0.312272	0.504014	0	0	1.79492	2.08907	C3ORF38;PDIA6
hsa-miR-6738-3p	1984-02-01	0.312272	0.504014	0	0	1.79492	2.08907	LMBRD2;ALDOA
hsa-miR-3166	1984-02-01	0.312272	0.504014	0	0	1.79492	2.08907	AVL9;MAP2K6
hsa-miR-376c-3p	1984-02-01	0.312272	0.504014	0	0	1.79492	2.08907	MORF4L2;UBE2D3
hsa-miR-3686	1984-02-01	0.312272	0.504014	0	0	1.79492	2.08907	SRP9;EIF4G2
mmu-miR-292a-5p	3/146	0.313377	0.505135	0	0	1.54488	1.7926	MFN1;TCEA1;AIDA
mmu-miR-290a-5p	3/146	0.313377	0.505135	0	0	1.54488	1.7926	MFN1;TCEA1;AIDA
hsa-miR-6797-5p	5/276	0.314343	0.505707	0	0	1.36	1.57389	TUBB;UBE2D3;HDLBP;UBE2V1;SENP2
hsa-miR-423-5p	6/343	0.315479	0.505707	0	0	1.3129	1.51465	BCLAF1;RRM2;TUBB;PGAM1;UBE2D3;ACTG1
hsa-miR-380-5p	2028-01-01	0.315737	0.505707	0	0	2.72305	3.13926	TMEM67
mmu-miR-20b-5p	2028-01-01	0.315737	0.505707	0	0	2.72305	3.13926	HIPK3
hsa-miR-494-5p	2028-01-01	0.315737	0.505707	0	0	2.72305	3.13926	RRM2
hsa-miR-6763-3p	2028-01-01	0.315737	0.505707	0	0	2.72305	3.13926	LSM3
hsa-miR-4999-5p	2028-01-01	0.315737	0.505707	0	0	2.72305	3.13926	SLC30A6
hsa-miR-1227-3p	4/211	0.316055	0.505707	0	0	1.42368	1.63985	TMEM67;FAM3C;ALDOA;ACTG1
hsa-miR-5590-3p	4/211	0.316055	0.505707	0	0	1.42368	1.63985	REST;SON;TWF1;U2SURP
hsa-miR-3679-3p	3/147	0.317054	0.505707	0	0	1.53407	1.76216	SLC30A6;SLC39A9;MCL1
hsa-miR-3154	3/147	0.317054	0.505707	0	0	1.53407	1.76216	MIER3;UBE2G1;SENP2
hsa-miR-541-5p	1985-02-01	0.317222	0.505707	0	0	1.77321	2.03591	CTBP1;G3BP2
hsa-miR-4463	1985-02-01	0.317222	0.505707	0	0	1.77321	2.03591	FXR1;THAP1
hsa-miR-10b-3p	1985-02-01	0.317222	0.505707	0	0	1.77321	2.03591	EIF4H;MATR3
hsa-miR-6784-3p	1985-02-01	0.317222	0.505707	0	0	1.77321	2.03591	HNRNPK;GABPB1
hsa-miR-16-2-3p	1985-02-01	0.317222	0.505707	0	0	1.77321	2.03591	NUS1;UBE2D3
hsa-miR-6842-3p	1985-02-01	0.317222	0.505707	0	0	1.77321	2.03591	CENPO;HNRNPA1L2
hsa-miR-4301	1986-02-01	0.322164	0.512259	0	0	1.75201	1.98449	NFYA;ARL6IP6
hsa-miR-4650-5p	1986-02-01	0.322164	0.512259	0	0	1.75201	1.98449	NCKAP1;HM13
hsa-miR-4714-3p	1986-02-01	0.322164	0.512259	0	0	1.75201	1.98449	DDX47;PGM3
hsa-miR-1273a	1986-02-01	0.322164	0.512259	0	0	1.75201	1.98449	KIF5B;PLEKHA3
hsa-miR-4459	11/689	0.32387	0.513064	0	0	1.19814	1.3508	TGIF1;NCKAP1;OCLN;SIKE1;TPM3;UBE2D3;AMD1;ACOT2;HDLBP;FAM3C;LSM3
hsa-miR-548av-5p	3/149	0.324411	0.513064	0	0	1.5129	1.70314	YWHAQ;TWF1;FAM3C
hsa-miR-8054	3/149	0.324411	0.513064	0	0	1.5129	1.70314	YWHAQ;TWF1;FAM3C
hsa-miR-548k	3/149	0.324411	0.513064	0	0	1.5129	1.70314	YWHAQ;TWF1;FAM3C
mmu-miR-216b-5p	2029-01-01	0.324953	0.513064	0	0	2.62567	2.95144	SCAMP1
mmu-miR-208a-5p	2029-01-01	0.324953	0.513064	0	0	2.62567	2.95144	ZNF567
mmu-miR-15b-5p	2029-01-01	0.324953	0.513064	0	0	2.62567	2.95144	RNF168
hsa-miR-6746-3p	2029-01-01	0.324953	0.513064	0	0	2.62567	2.95144	LAMP2
mmu-miR-804	4/214	0.32517	0.513064	0	0	1.40313	1.57628	SENP5;SGMS1;KNOP1;PEX13
hsa-miR-490-3p	4/214	0.32517	0.513064	0	0	1.40313	1.57628	NUS1;SENP5;RSRC1;HNRNPA1L2
mmu-miR-466q	4/214	0.32517	0.513064	0	0	1.40313	1.57628	PARG;SGMS1;MEMO1;ARMC8
hsa-miR-200c-3p	4/214	0.32517	0.513064	0	0	1.40313	1.57628	NCOA2;NGRN;TUBB;UBQLN1
hsa-miR-6862-3p	1987-02-01	0.327097	0.515115	0	0	1.73131	1.93473	HNRNPK;GABPB1
hsa-miR-1914-5p	1987-02-01	0.327097	0.515115	0	0	1.73131	1.93473	UBQLN1;YME1L1
hsa-miR-4258	1987-02-01	0.327097	0.515115	0	0	1.73131	1.93473	NCKAP1;GMPS
hsa-miR-1272	1988-02-01	0.33202	0.522534	0	0	1.71109	1.88658	TCEA1;UBE2V1
mmu-miR-106b-5p	1930-01-01	0.334046	0.523117	0	0	2.535	2.77957	MAPK14
hsa-miR-7848-3p	1930-01-01	0.334046	0.523117	0	0	2.535	2.77957	MIER3
hsa-miR-1295a	1930-01-01	0.334046	0.523117	0	0	2.535	2.77957	OCLN
mmu-miR-132-3p	1930-01-01	0.334046	0.523117	0	0	2.535	2.77957	STAMBP
hsa-miR-3168	1930-01-01	0.334046	0.523117	0	0	2.535	2.77957	UBQLN1
hsa-miR-4783-5p	1930-01-01	0.334046	0.523117	0	0	2.535	2.77957	LIN52
mmu-miR-497a-5p	1930-01-01	0.334046	0.523117	0	0	2.535	2.77957	RNF168
hsa-miR-5571-5p	4/217	0.334302	0.523117	0	0	1.38315	1.51553	HNRNPK;PARG;ALDOA;SOS1
hsa-miR-3663-5p	4/217	0.334302	0.523117	0	0	1.38315	1.51553	RBBP4;UBA5;YME1L1;ALDOA
hsa-miR-7854-3p	3/152	0.335447	0.524242	0	0	1.48221	1.61901	AKIRIN1;TUBB;ACTG1
hsa-miR-761	3/152	0.335447	0.524242	0	0	1.48221	1.61901	TPM3;UBE2V1;MCL1
hsa-miR-4706	1989-02-01	0.336934	0.525565	0	0	1.69133	1.83995	RAB5C;SENP2
hsa-miR-5585-3p	1989-02-01	0.336934	0.525565	0	0	1.69133	1.83995	PRLR;LIN52
hsa-miR-4670-3p	1989-02-01	0.336934	0.525565	0	0	1.69133	1.83995	UBE2G1;FAM3C
hsa-miR-4779	5/286	0.340796	0.530918	0	0	1.31093	1.41118	PRIM2;TPM3;HDLBP;YME1L1;UBE2V1
hsa-miR-6821-3p	5/286	0.340796	0.530918	0	0	1.31093	1.41118	PLSCR1;HM13;UBA5;YME1L1;ALDOA
hsa-miR-7155-5p	1990-02-01	0.341836	0.531015	0	0	1.67203	1.7948	ISY1;CENPO
hsa-miR-452-3p	1990-02-01	0.341836	0.531015	0	0	1.67203	1.7948	CAPRIN1;EIF4H
hsa-miR-6509-3p	1990-02-01	0.341836	0.531015	0	0	1.67203	1.7948	MIER3;PGK1
hsa-miR-4710	3/154	0.3428	0.531015	0	0	1.46243	1.56569	CASP8;MORF4L2;C16ORF87
hsa-miR-8056	1931-01-01	0.343016	0.531015	0	0	2.45037	2.62184	EIF4H
hsa-miR-3618	1931-01-01	0.343016	0.531015	0	0	2.45037	2.62184	KLF10
mmu-miR-210-3p	1931-01-01	0.343016	0.531015	0	0	2.45037	2.62184	ACOT2
mmu-miR-106a-5p	1931-01-01	0.343016	0.531015	0	0	2.45037	2.62184	HIPK3
hsa-miR-451a	1931-01-01	0.343016	0.531015	0	0	2.45037	2.62184	ADAM10
hsa-miR-3115	1931-01-01	0.343016	0.531015	0	0	2.45037	2.62184	ACP1
mmu-miR-665-3p	4/220	0.343446	0.531015	0	0	1.36373	1.45745	SENP5;TUBB;KNOP1;PEX13
hsa-miR-4487	4/220	0.343446	0.531015	0	0	1.36373	1.45745	PRIM2;ATP6V0E1;RNPS1;HS6ST1
hsa-miR-3675-3p	3/155	0.346475	0.534077	0	0	1.45274	1.53982	NCKAP1;RSRC1;KIF5B
hsa-miR-3650	3/155	0.346475	0.534077	0	0	1.45274	1.53982	EEA1;ACP1;ACTG1
hsa-miR-1271-3p	1991-02-01	0.346727	0.534077	0	0	1.65316	1.75105	DYRK1A;UBXN7
hsa-miR-3136-5p	1991-02-01	0.346727	0.534077	0	0	1.65316	1.75105	SRP9;HSPD1
hsa-miR-4439	1991-02-01	0.346727	0.534077	0	0	1.65316	1.75105	SRP9;HSPD1
hsa-miR-550a-3-5p	1991-02-01	0.346727	0.534077	0	0	1.65316	1.75105	DYRK1A;UBXN7
hsa-miR-5698	8/495	0.349414	0.53779	0	0	1.2112	1.27358	RSRC1;YME1L1;PLEKHA3;UBE2V1;ARIH1;SENP2;SEC23B;LIN52
mmu-miR-466f-3p	7/426	0.349574	0.53779	0	0	1.23143	1.29428	ATF2;PARG;B3GNT2;ADAM9;MEMO1;ARMC8;GABPB1
hsa-miR-2115-5p	1992-02-01	0.351606	0.53829	0	0	1.63471	1.70867	SIKE1;MEMO1
hsa-miR-495-5p	1992-02-01	0.351606	0.53829	0	0	1.63471	1.70867	SF3B1;MRPS18C
hsa-miR-516b-3p	1992-02-01	0.351606	0.53829	0	0	1.63471	1.70867	DDB1;SIKE1
hsa-miR-6796-3p	1992-02-01	0.351606	0.53829	0	0	1.63471	1.70867	UBR1;FAM91A1
hsa-miR-7162-5p	1992-02-01	0.351606	0.53829	0	0	1.63471	1.70867	DDB1;SIKE1
hsa-miR-325	1932-01-01	0.351866	0.53829	0	0	2.37121	2.47674	SF3B1
mmu-miR-434-3p	1932-01-01	0.351866	0.53829	0	0	2.37121	2.47674	CASP8
hsa-miR-4759	1932-01-01	0.351866	0.53829	0	0	2.37121	2.47674	UBE2G1
hsa-miR-424-3p	1932-01-01	0.351866	0.53829	0	0	2.37121	2.47674	BCLAF1
hsa-miR-6783-3p	4/223	0.352597	0.538738	0	0	1.34484	1.40191	NCKAP1;FEM1B;PGAM1;PGK1
hsa-miR-1343-3p	4/223	0.352597	0.538738	0	0	1.34484	1.40191	NCKAP1;FEM1B;PGAM1;PGK1
hsa-miR-527	3/157	0.353817	0.540268	0	0	1.43372	1.4896	NUS1;TMEM41A;MAPK14
hsa-miR-3922-3p	1993-02-01	0.356473	0.543312	0	0	1.61666	1.66758	ANAPC7;LSM3
mmu-miR-743b-3p	1993-02-01	0.356473	0.543312	0	0	1.61666	1.66758	TMTC3;DCUN1D1
hsa-miR-4276	1993-02-01	0.356473	0.543312	0	0	1.61666	1.66758	FXR1;CCT6A
hsa-miR-501-5p	3/158	0.357485	0.544233	0	0	1.4244	1.46522	PRDX3;GNAQ;ARIH1
hsa-miR-1976	8/499	0.357519	0.544233	0	0	1.20108	1.23539	AKIRIN1;HM13;RABL3;ALDOA;HNRNPA1L2;ANAPC1;CKS1B;THAP1
hsa-miR-142-5p	4/225	0.358699	0.54531	0	0	1.33254	1.36621	REST;SON;TWF1;U2SURP
hsa-miR-6755-3p	1933-01-01	0.360598	0.54531	0	0	2.29699	2.34291	AIDA
hsa-miR-4535	1933-01-01	0.360598	0.54531	0	0	2.29699	2.34291	AKIRIN1
mmu-miR-203-3p	1933-01-01	0.360598	0.54531	0	0	2.29699	2.34291	ZNF567
mmu-miR-146a-5p	1933-01-01	0.360598	0.54531	0	0	2.29699	2.34291	TGIF1
hsa-miR-940	11/711	0.361048	0.54531	0	0	1.15914	1.18087	SLC30A6;MFSD14B;SIKE1;CASP8;SENP5;PSMC4;CTBP1;TPM3;ACOT2;ILF2;THAP1
hsa-miR-6794-3p	3/159	0.36115	0.54531	0	0	1.4152	1.44132	ISY1;NUS1;ALDOA
hsa-miR-4310	3/159	0.36115	0.54531	0	0	1.4152	1.44132	FEM1B;ARIH1;PRLR
hsa-miR-7157-5p	3/159	0.36115	0.54531	0	0	1.4152	1.44132	FEM1B;ARIH1;PRLR
hsa-miR-4290	1994-02-01	0.361326	0.54531	0	0	1.59901	1.62775	ALDOA;PRLR
mmu-miR-743a-3p	1994-02-01	0.361326	0.54531	0	0	1.59901	1.62775	TMTC3;DCUN1D1
hsa-miR-516a-3p	1994-02-01	0.361326	0.54531	0	0	1.59901	1.62775	DDB1;SIKE1
hsa-miR-5189-3p	1994-02-01	0.361326	0.54531	0	0	1.59901	1.62775	NGRN;CTBP1
hsa-miR-432-5p	1994-02-01	0.361326	0.54531	0	0	1.59901	1.62775	TUBB;STAMBP
hsa-miR-6747-3p	8/501	0.36158	0.545359	0	0	1.19609	1.21674	AKIRIN1;HM13;RABL3;ALDOA;SF3B1;CKS1B;MCL1;THAP1
hsa-miR-1273f	5/295	0.364745	0.549561	0	0	1.26966	1.28052	NCKAP1;ATP6V0E1;TPM3;AVL9;THAP1
hsa-miR-30d-3p	3/160	0.364812	0.549561	0	0	1.40611	1.41788	MORC3;STAU1;DYRK1A
hsa-miR-20b-3p	1995-02-01	0.366166	0.549919	0	0	1.58173	1.58912	PLEKHF2;AVL9
hsa-miR-548g-3p	1995-02-01	0.366166	0.549919	0	0	1.58173	1.58912	TRUB1;KIF5B
hsa-miR-195-3p	1995-02-01	0.366166	0.549919	0	0	1.58173	1.58912	NUS1;UBE2D3
hsa-miR-4494	1995-02-01	0.366166	0.549919	0	0	1.58173	1.58912	AMD1;THAP1
hsa-miR-550a-5p	1995-02-01	0.366166	0.549919	0	0	1.58173	1.58912	DYRK1A;UBXN7
hsa-miR-6852-5p	4/228	0.367849	0.55211	0	0	1.31449	1.3146	NCKAP1;FEM1B;PGAM1;PGK1
hsa-miR-216a-5p	3/161	0.368471	0.552706	0	0	1.39714	1.3949	CAPN7;UBE2V1;SEC23B
hsa-miR-3200-3p	1934-01-01	0.369212	0.552808	0	0	2.22727	2.21922	DDB1
mmu-miR-206-3p	1934-01-01	0.369212	0.552808	0	0	2.22727	2.21922	MAP4K3
hsa-miR-3654	1934-01-01	0.369212	0.552808	0	0	2.22727	2.21922	HIPK3
hsa-miR-769-5p	4/229	0.370898	0.553454	0	0	1.30858	1.29789	ITGB1;YWHAB;UBE2D3;GART
hsa-miR-6764-5p	4/229	0.370898	0.553454	0	0	1.30858	1.29789	RABL3;UBXN7;SCAMP1;ALDOA
hsa-miR-6795-3p	1996-02-01	0.370992	0.553454	0	0	1.56483	1.55164	RRM2;UBE2V1
hsa-miR-6893-3p	1996-02-01	0.370992	0.553454	0	0	1.56483	1.55164	DCK;HNRNPA1L2
hsa-miR-6716-5p	1996-02-01	0.370992	0.553454	0	0	1.56483	1.55164	TGIF1;UBE2V1
hsa-miR-548av-3p	1996-02-01	0.370992	0.553454	0	0	1.56483	1.55164	SIKE1;KIF5B
hsa-miR-6807-5p	9/576	0.371412	0.553746	0	0	1.16996	1.15878	TGIF1;ISY1;RRM2;HM13;AMD1;ALDOA;GTF2H3;PRLR;LSM3
hsa-miR-6818-5p	3/162	0.372126	0.554139	0	0	1.38828	1.37235	AKIRIN1;HPS3;UBE2V1
hsa-miR-5582-5p	3/162	0.372126	0.554139	0	0	1.38828	1.37235	PLEKHF2;TMEM41A;YWHAB
hsa-miR-4659a-3p	4/230	0.373946	0.555841	0	0	1.30272	1.28141	CSNK2A1;FEM1B;CAPRIN1;MATR3
hsa-miR-4659b-3p	4/230	0.373946	0.555841	0	0	1.30272	1.28141	CSNK2A1;FEM1B;CAPRIN1;MATR3
hsa-miR-3150b-3p	4/230	0.373946	0.555841	0	0	1.30272	1.28141	PLSCR1;TSC22D1;SLC39A9;UBE2V1
mmu-miR-223-3p	5/299	0.375406	0.556674	0	0	1.25213	1.22677	ITGB1;REST;TMEM67;GCC2;PDIA6
hsa-miR-1252-5p	3/163	0.375777	0.556674	0	0	1.37953	1.35023	C17ORF80;EIF4H;UBE2G1
hsa-miR-369-3p	3/163	0.375777	0.556674	0	0	1.37953	1.35023	NUS1;MIER3;TUBB
mmu-miR-377-3p	3/163	0.375777	0.556674	0	0	1.37953	1.35023	ATF2;CCDC138;SCAMP1
hsa-miR-4522	1997-02-01	0.375803	0.556674	0	0	1.54828	1.51528	KLF10;DCK
mmu-miR-7b-5p	7/438	0.375862	0.556674	0	0	1.1964	1.17072	LSM12;SIKE1;PARG;MBD2;ACOT2;FBXO3;ADAM10
hsa-miR-766-5p	4/231	0.376993	0.556733	0	0	1.29692	1.26518	TGIF1;SET;RAB5C;UBE2D3
hsa-miR-4784	4/231	0.376993	0.556733	0	0	1.29692	1.26518	PLSCR1;TSC22D1;SLC39A9;UBE2V1
hsa-miR-6816-3p	1935-01-01	0.37771	0.556733	0	0	2.16165	2.10465	CKS1B
hsa-miR-4281	1935-01-01	0.37771	0.556733	0	0	2.16165	2.10465	PSMC4
hsa-miR-7152-3p	1935-01-01	0.37771	0.556733	0	0	2.16165	2.10465	FEM1B
mmu-miR-1194	1935-01-01	0.37771	0.556733	0	0	2.16165	2.10465	SPG21
hsa-miR-433-5p	1935-01-01	0.37771	0.556733	0	0	2.16165	2.10465	SOS1
hsa-miR-4694-5p	1935-01-01	0.37771	0.556733	0	0	2.16165	2.10465	POLR2D
hsa-miR-4695-5p	6/370	0.379818	0.559317	0	0	1.21383	1.17506	PRIM2;CSNK2A1;TPM3;ACOT2;UBR1;ALDOA
hsa-miR-1915-3p	4/232	0.380038	0.559317	0	0	1.29116	1.24918	RABL3;UBXN7;SCAMP1;ALDOA
hsa-miR-7845-5p	1998-02-01	0.380599	0.559317	0	0	1.53207	1.47999	PGAM1;AGFG1
hsa-miR-4801	1998-02-01	0.380599	0.559317	0	0	1.53207	1.47999	KLF10;SOS1
hsa-miR-4291	1998-02-01	0.380599	0.559317	0	0	1.53207	1.47999	FEM1B;UBE2V1
hsa-miR-2467-3p	7/441	0.382454	0.561256	0	0	1.18795	1.14179	ATP6V0E1;SON;TPM3;PGAM1;MORF4L2;CAPRIN1;UBE2G1
hsa-miR-5197-5p	3/165	0.383066	0.561256	0	0	1.36236	1.30725	MRS2;POLR2D;PHF6
hsa-miR-548f-3p	3/165	0.383066	0.561256	0	0	1.36236	1.30725	RNPS1;AVL9;PRLR
hsa-miR-5011-5p	10/653	0.383286	0.561256	0	0	1.14617	1.09915	TGIF1;RAB5C;STAU1;AMD1;TMTC3;G3BP2;POT1;HPS3;PLEKHA3;SOS1
hsa-miR-5096	5/302	0.383401	0.561256	0	0	1.23929	1.18807	GMPS;ALDOA;GTF2H3;MRPS18C;THAP1
hsa-miR-455-5p	1999-02-01	0.385379	0.561256	0	0	1.5162	1.44574	TRUB1;DYRK1A
hsa-miR-1296-3p	1999-02-01	0.385379	0.561256	0	0	1.5162	1.44574	IPPK;MIER3
hsa-miR-3611	1999-02-01	0.385379	0.561256	0	0	1.5162	1.44574	EIF4H;PAWR
hsa-miR-4731-3p	1999-02-01	0.385379	0.561256	0	0	1.5162	1.44574	KLF10;SOS1
hsa-miR-6732-5p	1999-02-01	0.385379	0.561256	0	0	1.5162	1.44574	SON;TPM3
hsa-miR-4681	1936-01-01	0.386095	0.561256	0	0	2.09979	1.99831	CTBP1
hsa-miR-1225-5p	1936-01-01	0.386095	0.561256	0	0	2.09979	1.99831	SON
hsa-miR-144-5p	1936-01-01	0.386095	0.561256	0	0	2.09979	1.99831	TGIF1
hsa-miR-4633-5p	1936-01-01	0.386095	0.561256	0	0	2.09979	1.99831	POLR2D
mmu-miR-145a-5p	1936-01-01	0.386095	0.561256	0	0	2.09979	1.99831	LAMP2
mmu-miR-511-5p	1936-01-01	0.386095	0.561256	0	0	2.09979	1.99831	TRUB1
mmu-miR-195a-5p	1936-01-01	0.386095	0.561256	0	0	2.09979	1.99831	RNF168
hsa-miR-548ar-3p	3/166	0.386704	0.561256	0	0	1.35394	1.28637	RNPS1;AVL9;PRLR
hsa-miR-548az-3p	3/166	0.386704	0.561256	0	0	1.35394	1.28637	RNPS1;AVL9;PRLR
hsa-miR-548e-3p	3/166	0.386704	0.561256	0	0	1.35394	1.28637	RNPS1;AVL9;PRLR
hsa-miR-5088-3p	3/166	0.386704	0.561256	0	0	1.35394	1.28637	CSNK2A1;FEM1B;G3BP2
hsa-miR-3689b-3p	10/656	0.388714	0.563178	0	0	1.14067	1.07783	PRIM2;SENP5;PLEKHB2;RBBP4;MIER3;CAPN7;YWHAB;PGAM1;YME1L1;ALDOA
hsa-miR-3689a-3p	10/656	0.388714	0.563178	0	0	1.14067	1.07783	PRIM2;SENP5;PLEKHB2;RBBP4;MIER3;CAPN7;YWHAB;PGAM1;YME1L1;ALDOA
hsa-miR-3689c	10/656	0.388714	0.563178	0	0	1.14067	1.07783	PRIM2;SENP5;PLEKHB2;RBBP4;MIER3;CAPN7;YWHAB;PGAM1;YME1L1;ALDOA
hsa-miR-4303	2/100	0.390144	0.564917	0	0	1.50065	1.41247	TUBB;LIN52
hsa-miR-1273h-5p	10/658	0.392335	0.567756	0	0	1.13703	1.06385	PRIM2;SENP5;PLEKHB2;RBBP4;MIER3;CAPN7;YWHAB;PGAM1;YME1L1;ALDOA
hsa-miR-466	3/168	0.393964	0.569358	0	0	1.33739	1.24577	PLEKHA3;SOS1;HNRNPA1L2
hsa-miR-6780a-5p	10/659	0.394147	0.569358	0	0	1.13522	1.05693	PRIM2;SENP5;PLEKHB2;RBBP4;MIER3;CAPN7;YWHAB;PGAM1;YME1L1;ALDOA
mmu-miR-592-5p	1937-01-01	0.394367	0.569358	0	0	2.04136	1.89943	NUS1
hsa-miR-3651	1937-01-01	0.394367	0.569358	0	0	2.04136	1.89943	SRP9
hsa-miR-203a-3p	5/307	0.396717	0.572416	0	0	1.21846	1.1265	EGLN1;SON;NFYA;SLC39A9;KIF5B
hsa-miR-548a-3p	3/169	0.397586	0.573333	0	0	1.32926	1.22604	RNPS1;AVL9;PRLR
hsa-miR-4671-3p	2/102	0.399623	0.574925	0	0	1.47049	1.34878	PLEKHF2;SEC23B
hsa-miR-5008-5p	2/102	0.399623	0.574925	0	0	1.47049	1.34878	AMD1;EIF4H
hsa-let-7a-2-3p	2/102	0.399623	0.574925	0	0	1.47049	1.34878	RAB5C;SCAMP1
hsa-miR-6805-5p	2/102	0.399623	0.574925	0	0	1.47049	1.34878	SON;ALDOA
hsa-miR-6788-5p	8/520	0.400335	0.575613	0	0	1.15056	1.05329	PRIM2;NCKAP1;PLEKHB2;RBBP4;MIER3;CAPN7;YWHAB;YME1L1
hsa-miR-5688	3/170	0.401202	0.57641	0	0	1.32124	1.20667	TGIF1;CASP8;MCL1
mmu-miR-3102-3p	1938-01-01	0.402528	0.57641	0	0	1.98608	1.80732	MCL1
hsa-miR-4766-3p	1938-01-01	0.402528	0.57641	0	0	1.98608	1.80732	RBBP4
hsa-miR-4791	1938-01-01	0.402528	0.57641	0	0	1.98608	1.80732	EGLN1
hsa-miR-6766-3p	1938-01-01	0.402528	0.57641	0	0	1.98608	1.80732	UBE2V1
mmu-miR-5113	1938-01-01	0.402528	0.57641	0	0	1.98608	1.80732	CTBP2
mmu-miR-1927	1938-01-01	0.402528	0.57641	0	0	1.98608	1.80732	SOS1
hsa-miR-329-5p	2/103	0.404337	0.578328	0	0	1.45585	1.31829	ARFGEF2;AIDA
mmu-miR-759	2/103	0.404337	0.578328	0	0	1.45585	1.31829	SENP5;KNOP1
hsa-miR-3622b-5p	3/171	0.404811	0.578336	0	0	1.31331	1.18767	ITGB1;POLR2D;ALDOA
hsa-miR-7-2-3p	3/171	0.404811	0.578336	0	0	1.31331	1.18767	TGIF1;AKIRIN1;NCBP2
hsa-miR-4257	6/381	0.406193	0.579974	0	0	1.17755	1.06089	DDB1;RAB5C;ATP6V0E1;CTBP2;TPM3;UBE2V1
hsa-miR-6779-5p	10/666	0.406839	0.580558	0	0	1.12269	1.00968	PRIM2;SENP5;PLEKHB2;RBBP4;MIER3;CAPN7;YWHAB;PGAM1;YME1L1;ALDOA
mmu-miR-758-3p	4/241	0.407362	0.580969	0	0	1.24156	1.11498	EEA1;ATF2;SOS1;KDM6A
hsa-miR-5697	3/172	0.408415	0.581797	0	0	1.30547	1.16901	NUS1;RABL3;THAP1
hsa-miR-4324	3/172	0.408415	0.581797	0	0	1.30547	1.16901	NCKAP1;REST;CTBP1
hsa-miR-3074-5p	2/104	0.409033	0.582003	0	0	1.44151	1.28865	PSMC1;DCK
hsa-miR-708-5p	2/104	0.409033	0.582003	0	0	1.44151	1.28865	TSC22D1;TUBB
hsa-miR-6718-5p	1939-01-01	0.410579	0.582856	0	0	1.93372	1.72137	AIDA
hsa-miR-3142	1939-01-01	0.410579	0.582856	0	0	1.93372	1.72137	EIF4H
hsa-miR-203b-5p	1939-01-01	0.410579	0.582856	0	0	1.93372	1.72137	AIDA
hsa-miR-3615	1939-01-01	0.410579	0.582856	0	0	1.93372	1.72137	ALDOA
hsa-miR-338-5p	2/105	0.413711	0.586626	0	0	1.42744	1.25984	MATR3;UBE2G1
hsa-miR-889-3p	2/105	0.413711	0.586626	0	0	1.42744	1.25984	TCEA1;LSM3
hsa-miR-30e-3p	3/174	0.415603	0.587362	0	0	1.29007	1.13271	MORC3;STAU1;DYRK1A
hsa-miR-5699-3p	3/174	0.415603	0.587362	0	0	1.29007	1.13271	PLSCR1;TPM3;UBXN7
hsa-miR-7162-3p	3/174	0.415603	0.587362	0	0	1.29007	1.13271	PRIM2;TUBB;UBE2D3
hsa-miR-4421	3/174	0.415603	0.587362	0	0	1.29007	1.13271	PLSCR1;TPM3;UBXN7
hsa-miR-3176	2/106	0.418371	0.587362	0	0	1.41364	1.23183	ANAPC7;LSM3
hsa-miR-6507-3p	2/106	0.418371	0.587362	0	0	1.41364	1.23183	FEM1B;PGK1
hsa-miR-6810-5p	2/106	0.418371	0.587362	0	0	1.41364	1.23183	PGAM1;UBE2V1
hsa-miR-5588-3p	2/106	0.418371	0.587362	0	0	1.41364	1.23183	UBE2V1;AVL9
hsa-let-7g-3p	2/106	0.418371	0.587362	0	0	1.41364	1.23183	RAB5C;SCAMP1
mmu-miR-686	1940-01-01	0.418522	0.587362	0	0	1.88404	1.64105	RBBP4
hsa-miR-3144-3p	1940-01-01	0.418522	0.587362	0	0	1.88404	1.64105	SPRTN
hsa-miR-150-3p	1940-01-01	0.418522	0.587362	0	0	1.88404	1.64105	MRS2
mmu-miR-1897-5p	1940-01-01	0.418522	0.587362	0	0	1.88404	1.64105	ACOT2
hsa-miR-1243	1940-01-01	0.418522	0.587362	0	0	1.88404	1.64105	AMD1
hsa-miR-6808-3p	1940-01-01	0.418522	0.587362	0	0	1.88404	1.64105	POLR2D
hsa-miR-1245b-5p	1940-01-01	0.418522	0.587362	0	0	1.88404	1.64105	EIF4H
hsa-miR-708-3p	1940-01-01	0.418522	0.587362	0	0	1.88404	1.64105	SCAMP1
hsa-miR-3201	1940-01-01	0.418522	0.587362	0	0	1.88404	1.64105	EGLN1
hsa-miR-4753-3p	5/316	0.420612	0.589853	0	0	1.18265	1.02422	PLSCR1;PARG;YWHAB;PIK3CB;PRLR
hsa-miR-30c-1-3p	8/530	0.420776	0.589853	0	0	1.12793	0.976401	PRIM2;NCKAP1;PLEKHB2;RBBP4;MIER3;CAPN7;YWHAB;YME1L1
hsa-miR-3664-3p	3/176	0.422762	0.591976	0	0	1.27502	1.09772	AKIRIN1;ANAPC7;UBE2D3
hsa-miR-622	2/107	0.423012	0.591976	0	0	1.40011	1.20459	MORC3;ALDOA
hsa-miR-4316	2/107	0.423012	0.591976	0	0	1.40011	1.20459	RRM2;ACTG1
hsa-miR-92a-2-5p	4/247	0.425453	0.593624	0	0	1.21053	1.03452	RNPS1;PLEKHA3;UBE2V1;SENP2
hsa-miR-6800-5p	1941-01-01	0.426359	0.593624	0	0	1.83685	1.56587	UBE2G1
hsa-miR-4782-3p	1941-01-01	0.426359	0.593624	0	0	1.83685	1.56587	UBE2V1
hsa-miR-6834-3p	1941-01-01	0.426359	0.593624	0	0	1.83685	1.56587	RSRC1
hsa-miR-509-3p	1941-01-01	0.426359	0.593624	0	0	1.83685	1.56587	EEA1
mmu-miR-7a-5p	1941-01-01	0.426359	0.593624	0	0	1.83685	1.56587	SIKE1
hsa-miR-1251-5p	1941-01-01	0.426359	0.593624	0	0	1.83685	1.56587	ALDOA
hsa-miR-4707-5p	1941-01-01	0.426359	0.593624	0	0	1.83685	1.56587	LSM3
mmu-miR-140-5p	1941-01-01	0.426359	0.593624	0	0	1.83685	1.56587	THAP1
hsa-miR-6761-5p	2/108	0.427634	0.594391	0	0	1.38683	1.17809	GMPS;LIN52
mmu-miR-335-3p	2/108	0.427634	0.594391	0	0	1.38683	1.17809	UBE2D3;AIDA
hsa-miR-504-5p	2/108	0.427634	0.594391	0	0	1.38683	1.17809	CSNK2A1;SF3B1
hsa-miR-6514-3p	3/178	0.429892	0.596964	0	0	1.26032	1.06399	CAPN7;UBQLN1;AVL9
hsa-miR-4753-5p	2/109	0.432236	0.596964	0	0	1.3738	1.15232	TRUB1;HDLBP
hsa-miR-6513-5p	6/392	0.432487	0.596964	0	0	1.14334	0.958355	ISY1;STAU1;RBBP4;CAPN7;YME1L1;CACYBP
mmu-miR-3064-5p	3/179	0.433446	0.596964	0	0	1.2531	1.04758	PDXDC1;TCEA1;AIDA
hsa-miR-4447	3/179	0.433446	0.596964	0	0	1.2531	1.04758	PLEKHA3;UBE2V1;SENP2
mmu-miR-3085-3p	3/179	0.433446	0.596964	0	0	1.2531	1.04758	PDXDC1;TCEA1;AIDA
hsa-miR-4472	3/179	0.433446	0.596964	0	0	1.2531	1.04758	PLEKHA3;UBE2V1;SENP2
hsa-miR-218-1-3p	1942-01-01	0.43409	0.596964	0	0	1.79195	1.49539	SLC39A9
hsa-miR-3171	1942-01-01	0.43409	0.596964	0	0	1.79195	1.49539	SET
hsa-miR-6772-5p	1942-01-01	0.43409	0.596964	0	0	1.79195	1.49539	ACP1
hsa-miR-652-5p	1942-01-01	0.43409	0.596964	0	0	1.79195	1.49539	PLEKHA3
hsa-miR-3655	1942-01-01	0.43409	0.596964	0	0	1.79195	1.49539	FEM1B
mmu-miR-450b-5p	1942-01-01	0.43409	0.596964	0	0	1.79195	1.49539	SGMS1
mmu-miR-16-5p	1942-01-01	0.43409	0.596964	0	0	1.79195	1.49539	RNF168
hsa-miR-6069	1942-01-01	0.43409	0.596964	0	0	1.79195	1.49539	ALDOA
mmu-miR-466f	1942-01-01	0.43409	0.596964	0	0	1.79195	1.49539	ACOT2
hsa-miR-4497	1942-01-01	0.43409	0.596964	0	0	1.79195	1.49539	TPM3
hsa-miR-5191	1942-01-01	0.43409	0.596964	0	0	1.79195	1.49539	MORF4L2
hsa-miR-5587-3p	1942-01-01	0.43409	0.596964	0	0	1.79195	1.49539	LSM3
hsa-miR-370-3p	2/110	0.436819	0.599713	0	0	1.36101	1.12724	HNRNPA1L2;DCK
hsa-miR-4457	2/110	0.436819	0.599713	0	0	1.36101	1.12724	YWHAB;THAP1
hsa-miR-1264	2/110	0.436819	0.599713	0	0	1.36101	1.12724	FXR1;MCL1
hsa-miR-3135b	6/394	0.43725	0.59997	0	0	1.13733	0.940859	YWHAB;HM13;POLR2D;YME1L1;SEC23B;LIN52
hsa-miR-6722-3p	3/181	0.440528	0.603076	0	0	1.23889	1.01562	SENP5;NUP35;MCL1
hsa-miR-599	2/111	0.441381	0.603076	0	0	1.34845	1.10283	PRDX3;EIF4G2
hsa-miR-4786-3p	2/111	0.441381	0.603076	0	0	1.34845	1.10283	MFSD14A;TPM3
hsa-miR-1246	1943-01-01	0.441717	0.603076	0	0	1.7492	1.42925	DYRK1A
hsa-miR-376c-5p	1943-01-01	0.441717	0.603076	0	0	1.7492	1.42925	EIF4H
hsa-miR-376b-5p	1943-01-01	0.441717	0.603076	0	0	1.7492	1.42925	EIF4H
hsa-miR-4724-3p	1943-01-01	0.441717	0.603076	0	0	1.7492	1.42925	TWF1
hsa-miR-3907	1943-01-01	0.441717	0.603076	0	0	1.7492	1.42925	PGAM1
mmu-miR-1894-5p	1943-01-01	0.441717	0.603076	0	0	1.7492	1.42925	STAMBP
hsa-miR-6856-5p	4/253	0.443404	0.605044	0	0	1.181	0.960472	TSC22D1;B3GNT2;SENP2;GABPA
hsa-miR-106a-3p	3/182	0.444056	0.605598	0	0	1.23191	1.00007	POLR2D;G3BP2;PEX13
hsa-miR-4329	2/112	0.445924	0.607473	0	0	1.33613	1.07906	GMPS;LIN52
hsa-miR-185-3p	2/112	0.445924	0.607473	0	0	1.33613	1.07906	SENP2;U2SURP
hsa-miR-3187-5p	4/254	0.446381	0.607759	0	0	1.17621	0.948712	KLF10;OCLN;FIGNL1;STRN3
hsa-miR-30c-2-3p	8/543	0.447281	0.608648	0	0	1.09978	0.88485	PRIM2;NCKAP1;PLEKHB2;RBBP4;MIER3;CAPN7;YWHAB;YME1L1
hsa-miR-204-5p	6/399	0.449126	0.609633	0	0	1.12257	0.898566	MIER3;SLC39A9;FEM1B;CAPRIN1;G3BP2;PRLR
hsa-miR-5089-3p	1944-01-01	0.449242	0.609633	0	0	1.70843	1.36708	SOS1
hsa-miR-4278	1944-01-01	0.449242	0.609633	0	0	1.70843	1.36708	SON
hsa-miR-875-5p	1944-01-01	0.449242	0.609633	0	0	1.70843	1.36708	SPRTN
mmu-miR-186-5p	1944-01-01	0.449242	0.609633	0	0	1.70843	1.36708	CCDC138
hsa-miR-19b-1-5p	2/113	0.450446	0.610929	0	0	1.32402	1.05593	CASP8;SLC39A9
hsa-miR-495-3p	3/184	0.451087	0.611126	0	0	1.21817	0.96978	TGIF1;CASP8;MCL1
hsa-miR-7-1-3p	3/184	0.451087	0.611126	0	0	1.21817	0.96978	TGIF1;AKIRIN1;NCBP2
hsa-miR-5189-5p	4/256	0.452318	0.612458	0	0	1.16676	0.925668	KLF10;OCLN;FIGNL1;STRN3
hsa-miR-6860	4/257	0.45528	0.615301	0	0	1.16209	0.914379	KLF10;OCLN;FIGNL1;STRN3
hsa-miR-612	4/257	0.45528	0.615301	0	0	1.16209	0.914379	KLF10;OCLN;FIGNL1;STRN3
hsa-miR-1231	1945-01-01	0.456666	0.615301	0	0	1.66952	1.30857	LSM3
hsa-miR-1228-5p	1945-01-01	0.456666	0.615301	0	0	1.66952	1.30857	OCLN
hsa-miR-492	1945-01-01	0.456666	0.615301	0	0	1.66952	1.30857	AKIRIN1
hsa-miR-27a-5p	1945-01-01	0.456666	0.615301	0	0	1.66952	1.30857	U2SURP
hsa-miR-618	1945-01-01	0.456666	0.615301	0	0	1.66952	1.30857	MBD2
hsa-miR-4727-3p	1945-01-01	0.456666	0.615301	0	0	1.66952	1.30857	IPPK
hsa-miR-3675-5p	1945-01-01	0.456666	0.615301	0	0	1.66952	1.30857	UBE2V1
hsa-miR-1285-3p	4/258	0.458236	0.61674	0	0	1.15745	0.903241	KLF10;OCLN;FIGNL1;STRN3
hsa-miR-764	4/258	0.458236	0.61674	0	0	1.15745	0.903241	FXR1;PLSCR1;ALDOA;MAPK14
hsa-miR-3978	2/115	0.459426	0.618005	0	0	1.30045	1.01146	PLEKHF2;DCK
hsa-miR-6758-5p	4/259	0.461187	0.620034	0	0	1.15285	0.892253	TSC22D1;B3GNT2;SENP2;GABPA
hsa-miR-4639-3p	3/187	0.461564	0.620203	0	0	1.19812	0.926311	ISY1;NUS1;ALDOA
hsa-miR-1277-5p	9/624	0.463309	0.621768	0	0	1.07595	0.827792	TGIF1;RNF168;PLEKHF2;NUS1;AMD1;SPRTN;G3BP2;POT1;PLEKHA3
hsa-miR-4713-3p	1946-01-01	0.463991	0.621768	0	0	1.63234	1.25346	THAP1
hsa-miR-4747-3p	1946-01-01	0.463991	0.621768	0	0	1.63234	1.25346	HNRNPA1L2
hsa-miR-219a-5p	1946-01-01	0.463991	0.621768	0	0	1.63234	1.25346	UBE2V1
hsa-miR-3920	1946-01-01	0.463991	0.621768	0	0	1.63234	1.25346	RALGAPB
hsa-miR-214-5p	3/188	0.465038	0.622494	0	0	1.19159	0.912323	CAPN7;ACOT2;AVL9
hsa-miR-5001-3p	3/188	0.465038	0.622494	0	0	1.19159	0.912323	ACOT2;UBXN7;ALDOA
hsa-miR-511-3p	4/261	0.467071	0.624753	0	0	1.14376	0.870716	YWHAQ;POT1;HPS3;PLEKHA3
hsa-miR-5589-5p	5/334	0.467836	0.624753	0	0	1.11691	0.848444	ISY1;MFN1;WDR53;RNPS1;GTF2H3
hsa-miR-5093	2/117	0.468321	0.624753	0	0	1.27771	0.96927	EIF4H;SRP9
hsa-miR-216b-3p	2/117	0.468321	0.624753	0	0	1.27771	0.96927	OCLN;TWF1
hsa-miR-6877-3p	2/117	0.468321	0.624753	0	0	1.27771	0.96927	ACTG1;CKS1B
hsa-miR-4286	2/117	0.468321	0.624753	0	0	1.27771	0.96927	NFYA;PGK1
hsa-miR-567	3/189	0.468502	0.624753	0	0	1.18512	0.898577	CAPRIN1;TMTC3;PLEKHA3
mmu-miR-34b-5p	5/335	0.470429	0.625664	0	0	1.11346	0.839676	RALGAPB;PLEKHB2;TUBB;RNF4;ALDOA
hsa-miR-7157-3p	1947-01-01	0.471217	0.625664	0	0	1.59677	1.20147	HNRNPA1L2
hsa-miR-3691-5p	1947-01-01	0.471217	0.625664	0	0	1.59677	1.20147	EIF4H
hsa-miR-4728-3p	1947-01-01	0.471217	0.625664	0	0	1.59677	1.20147	ALDOA
hsa-miR-5684	1947-01-01	0.471217	0.625664	0	0	1.59677	1.20147	KIF5B
hsa-miR-4638-3p	1947-01-01	0.471217	0.625664	0	0	1.59677	1.20147	REST
mmu-miR-29a-3p	1947-01-01	0.471217	0.625664	0	0	1.59677	1.20147	MCL1
hsa-miR-3613-5p	1947-01-01	0.471217	0.625664	0	0	1.59677	1.20147	HNRNPA1L2
hsa-miR-548o-3p	2/118	0.472736	0.627041	0	0	1.26663	0.94898	KLF10;SLC39A9
hsa-miR-4768-5p	5/336	0.473017	0.627041	0	0	1.11004	0.831004	TRUB1;CSNK2A1;SLC39A9;PPP1R8;LSM3
hsa-miR-6833-3p	5/336	0.473017	0.627041	0	0	1.11004	0.831004	TRUB1;CSNK2A1;SLC39A9;PPP1R8;LSM3
hsa-miR-29b-2-5p	2/119	0.477129	0.630035	0	0	1.25574	0.929206	TPM3;AMD1
hsa-miR-4309	2/119	0.477129	0.630035	0	0	1.25574	0.929206	RABL3;THAP1
hsa-miR-6819-3p	2/119	0.477129	0.630035	0	0	1.25574	0.929206	ACTG1;CKS1B
hsa-miR-4726-5p	2/119	0.477129	0.630035	0	0	1.25574	0.929206	TMEM67;CCT7
mmu-miR-3059-5p	1948-01-01	0.478346	0.630035	0	0	1.56272	1.15238	ELMOD2
hsa-miR-28-3p	1948-01-01	0.478346	0.630035	0	0	1.56272	1.15238	EIF4G2
mmu-miR-712-5p	1948-01-01	0.478346	0.630035	0	0	1.56272	1.15238	YME1L1
hsa-miR-1268b	1948-01-01	0.478346	0.630035	0	0	1.56272	1.15238	GMPS
hsa-miR-6737-3p	1948-01-01	0.478346	0.630035	0	0	1.56272	1.15238	HNRNPA1L2
hsa-miR-3670	1948-01-01	0.478346	0.630035	0	0	1.56272	1.15238	UBE2D3
hsa-miR-6735-3p	1948-01-01	0.478346	0.630035	0	0	1.56272	1.15238	CASP8
hsa-miR-4687-3p	1948-01-01	0.478346	0.630035	0	0	1.56272	1.15238	RAB5C
hsa-miR-4640-5p	2/120	0.4815	0.633511	0	0	1.24503	0.909932	TMEM67;CCT7
hsa-miR-1323	2/120	0.4815	0.633511	0	0	1.24503	0.909932	KLF10;SLC39A9
hsa-miR-6824-5p	1949-01-01	0.485379	0.636512	0	0	1.53008	1.10598	UBE2D3
hsa-miR-1284	1949-01-01	0.485379	0.636512	0	0	1.53008	1.10598	TMTC3
hsa-miR-1178-5p	1949-01-01	0.485379	0.636512	0	0	1.53008	1.10598	MAP2K6
hsa-miR-6762-3p	1949-01-01	0.485379	0.636512	0	0	1.53008	1.10598	RNF4
hsa-miR-6793-5p	1949-01-01	0.485379	0.636512	0	0	1.53008	1.10598	ISY1
hsa-miR-3661	1949-01-01	0.485379	0.636512	0	0	1.53008	1.10598	YWHAB
hsa-miR-3156-3p	2/121	0.485848	0.636512	0	0	1.23451	0.891142	C3ORF38;ARL6IP6
hsa-miR-3198	2/121	0.485848	0.636512	0	0	1.23451	0.891142	RABL3;THAP1
hsa-miR-3116	2/122	0.490173	0.641575	0	0	1.22416	0.87282	HM13;POLR2D
hsa-miR-6087	4/269	0.490371	0.641575	0	0	1.10878	0.790107	NCKAP1;TPM3;ACOT2;ALDOA
hsa-miR-1247-3p	5/343	0.491021	0.641575	0	0	1.08666	0.772908	NCKAP1;ATP6V0E1;HM13;AVL9;SF3B1
hsa-miR-6500-5p	1950-01-01	0.492317	0.641575	0	0	1.49878	1.06208	HS6ST1
hsa-miR-4445-5p	1950-01-01	0.492317	0.641575	0	0	1.49878	1.06208	UBE2V1
hsa-miR-6841-3p	1950-01-01	0.492317	0.641575	0	0	1.49878	1.06208	MFSD14A
hsa-miR-6775-3p	1950-01-01	0.492317	0.641575	0	0	1.49878	1.06208	HNRNPA1L2
hsa-miR-4633-3p	1950-01-01	0.492317	0.641575	0	0	1.49878	1.06208	HS6ST1
hsa-miR-99b-3p	1950-01-01	0.492317	0.641575	0	0	1.49878	1.06208	ACTG1
hsa-miR-1292-5p	1950-01-01	0.492317	0.641575	0	0	1.49878	1.06208	INTS14
hsa-miR-371a-5p	5/344	0.493576	0.642875	0	0	1.0834	0.764967	TGIF1;FEM1B;YME1L1;ACP1;TMPO
hsa-miR-762	2/123	0.494476	0.643367	0	0	1.21398	0.854953	AMD1;RNF4
hsa-miR-3140-3p	2/123	0.494476	0.643367	0	0	1.21398	0.854953	SON;MIER3
mmu-miR-466l-3p	2/124	0.498755	0.645771	0	0	1.20397	0.837527	FAM91A1;PRLR
mmu-miR-669m-3p	2/124	0.498755	0.645771	0	0	1.20397	0.837527	CCDC138;TCTN3
hsa-miR-365a-3p	2/124	0.498755	0.645771	0	0	1.20397	0.837527	MFSD14B;HDLBP
hsa-miR-676-3p	1951-01-01	0.499163	0.645771	0	0	1.46873	1.02051	CTBP1
hsa-miR-631	1951-01-01	0.499163	0.645771	0	0	1.46873	1.02051	YWHAB
mmu-miR-29b-3p	1951-01-01	0.499163	0.645771	0	0	1.46873	1.02051	MCL1
hsa-miR-7161-3p	1951-01-01	0.499163	0.645771	0	0	1.46873	1.02051	U2SURP
hsa-miR-345-5p	1951-01-01	0.499163	0.645771	0	0	1.46873	1.02051	OCLN
hsa-miR-6750-3p	1951-01-01	0.499163	0.645771	0	0	1.46873	1.02051	PRPF6
hsa-miR-4641	1951-01-01	0.499163	0.645771	0	0	1.46873	1.02051	HNRNPA1L2
mmu-miR-3082-5p	3/198	0.499208	0.645771	0	0	1.1299	0.78498	SENP5;KNOP1;PEX13
hsa-miR-1306-5p	3/199	0.502565	0.649669	0	0	1.12408	0.773402	IPPK;AKIRIN1;RABL3
hsa-miR-5196-3p	2/125	0.503012	0.649669	0	0	1.19412	0.820528	ATP6V0E1;CASP8
hsa-miR-6890-5p	2/125	0.503012	0.649669	0	0	1.19412	0.820528	GMPS;UBE2V1
hsa-miR-96-5p	3/200	0.50591	0.65069	0	0	1.11832	0.762016	PGAM1;PGK1;TMPO
hsa-miR-4427	1952-01-01	0.505916	0.65069	0	0	1.43986	0.981098	ARL6IP6
hsa-miR-1268a	1952-01-01	0.505916	0.65069	0	0	1.43986	0.981098	GMPS
hsa-miR-519e-3p	1952-01-01	0.505916	0.65069	0	0	1.43986	0.981098	LMBRD2
hsa-miR-3617-3p	1952-01-01	0.505916	0.65069	0	0	1.43986	0.981098	UBE2V1
hsa-miR-6505-3p	1952-01-01	0.505916	0.65069	0	0	1.43986	0.981098	HIPK3
hsa-miR-609	1952-01-01	0.505916	0.65069	0	0	1.43986	0.981098	ACP1
hsa-miR-4684-3p	1952-01-01	0.505916	0.65069	0	0	1.43986	0.981098	G3BP2
hsa-miR-3123	2/126	0.507245	0.652059	0	0	1.18443	0.803943	WDR1;ACTG1
hsa-miR-190a-3p	9/648	0.508562	0.653411	0	0	1.03424	0.699317	SIKE1;REST;RAB5C;STAU1;AMD1;TMTC3;G3BP2;POT1;PLEKHA3
hsa-miR-548d-5p	3/202	0.512566	0.654814	0	0	1.10696	0.739812	DDB1;HDLBP;FAM3C
hsa-miR-1322	1953-01-01	0.512579	0.654814	0	0	1.4121	0.943706	UBE2V1
hsa-miR-7704	1953-01-01	0.512579	0.654814	0	0	1.4121	0.943706	CENPO
hsa-miR-616-3p	1953-01-01	0.512579	0.654814	0	0	1.4121	0.943706	MIER3
hsa-miR-378j	1953-01-01	0.512579	0.654814	0	0	1.4121	0.943706	PRDX3
hsa-miR-6755-5p	1953-01-01	0.512579	0.654814	0	0	1.4121	0.943706	AIDA
hsa-miR-8083	1953-01-01	0.512579	0.654814	0	0	1.4121	0.943706	C17ORF80
mmu-miR-3106-5p	1953-01-01	0.512579	0.654814	0	0	1.4121	0.943706	EIF4G2
hsa-miR-6839-5p	1953-01-01	0.512579	0.654814	0	0	1.4121	0.943706	PRDX3
hsa-miR-4765	1953-01-01	0.512579	0.654814	0	0	1.4121	0.943706	UBE2V1
hsa-miR-515-3p	1953-01-01	0.512579	0.654814	0	0	1.4121	0.943706	LMBRD2
hsa-miR-6079	2/128	0.515641	0.657702	0	0	1.16551	0.771968	LSM12;UBE2V1
hsa-miR-550b-2-5p	2/128	0.515641	0.657702	0	0	1.16551	0.771968	DYRK1A;UBXN7
hsa-miR-3065-5p	2/128	0.515641	0.657702	0	0	1.16551	0.771968	HDLBP;U2SURP
hsa-miR-3173-5p	1954-01-01	0.519152	0.659109	0	0	1.38538	0.9082	HNRNPA1L2
hsa-miR-6799-3p	1954-01-01	0.519152	0.659109	0	0	1.38538	0.9082	HNRNPA1L2
hsa-miR-1-5p	1954-01-01	0.519152	0.659109	0	0	1.38538	0.9082	CAPRIN1
hsa-miR-3677-5p	1954-01-01	0.519152	0.659109	0	0	1.38538	0.9082	ACOT2
hsa-miR-33b-3p	1954-01-01	0.519152	0.659109	0	0	1.38538	0.9082	LMBRD2
hsa-miR-1298-5p	1954-01-01	0.519152	0.659109	0	0	1.38538	0.9082	FXR1
hsa-miR-767-3p	1954-01-01	0.519152	0.659109	0	0	1.38538	0.9082	HIPK3
hsa-miR-371b-3p	1954-01-01	0.519152	0.659109	0	0	1.38538	0.9082	TPM3
hsa-miR-7160-3p	1954-01-01	0.519152	0.659109	0	0	1.38538	0.9082	KIF5B
hsa-miR-500b-3p	3/205	0.522461	0.662969	0	0	1.09036	0.707864	HNRNPK;PLEKHA3;STRN3
hsa-miR-6732-3p	2/130	0.523941	0.66392	0	0	1.14718	0.741508	SON;UBXN7
hsa-miR-6734-5p	2/130	0.523941	0.66392	0	0	1.14718	0.741508	HS6ST1;MAP2K6
hsa-miR-1291	1955-01-01	0.525637	0.66392	0	0	1.35966	0.874458	HNRNPA1L2
mmu-miR-128-3p	1955-01-01	0.525637	0.66392	0	0	1.35966	0.874458	MAPK14
hsa-miR-635	1955-01-01	0.525637	0.66392	0	0	1.35966	0.874458	HM13
hsa-miR-584-3p	1955-01-01	0.525637	0.66392	0	0	1.35966	0.874458	G3BP2
hsa-miR-5011-3p	1955-01-01	0.525637	0.66392	0	0	1.35966	0.874458	YWHAQ
hsa-miR-135b-3p	1955-01-01	0.525637	0.66392	0	0	1.35966	0.874458	SON
mmu-miR-3471	1955-01-01	0.525637	0.66392	0	0	1.35966	0.874458	CASP8
hsa-miR-204-3p	2/131	0.528056	0.665951	0	0	1.13823	0.726819	ATF2;ASB3
hsa-miR-5691	2/131	0.528056	0.665951	0	0	1.13823	0.726819	RBBP4;THAP1
hsa-miR-4672	2/131	0.528056	0.665951	0	0	1.13823	0.726819	RRM2;ACOT2
hsa-miR-4763-3p	4/283	0.530091	0.666672	0	0	1.05238	0.667955	SENP5;PGAM1;HDLBP;MCL1
hsa-miR-4520-3p	1956-01-01	0.532035	0.666672	0	0	1.33487	0.842366	KLF10
hsa-miR-3136-3p	1956-01-01	0.532035	0.666672	0	0	1.33487	0.842366	LSM3
hsa-miR-96-3p	1956-01-01	0.532035	0.666672	0	0	1.33487	0.842366	UBE2V1
hsa-miR-7155-3p	1956-01-01	0.532035	0.666672	0	0	1.33487	0.842366	LSM3
hsa-miR-146b-3p	1956-01-01	0.532035	0.666672	0	0	1.33487	0.842366	TPM3
hsa-miR-6824-3p	1956-01-01	0.532035	0.666672	0	0	1.33487	0.842366	HNRNPA1L2
hsa-miR-6499-5p	1956-01-01	0.532035	0.666672	0	0	1.33487	0.842366	YME1L1
hsa-miR-500a-3p	2/132	0.532147	0.666672	0	0	1.12942	0.712476	PGM3;STRN3
hsa-miR-1254	2/132	0.532147	0.666672	0	0	1.12942	0.712476	HM13;POLR2D
hsa-miR-194-3p	2/132	0.532147	0.666672	0	0	1.12942	0.712476	ERI2;POLR2D
hsa-miR-6805-3p	2/132	0.532147	0.666672	0	0	1.12942	0.712476	RBBP4;THAP1
hsa-miR-4483	2/132	0.532147	0.666672	0	0	1.12942	0.712476	TPM3;RNPS1
hsa-miR-223-5p	4/284	0.532871	0.66724	0	0	1.04857	0.660051	AMD1;TMTC3;POT1;PLEKHA3
hsa-miR-6893-5p	9/663	0.536276	0.671163	0	0	1.00972	0.629163	SLC30A6;MFSD14B;SIKE1;CASP8;SENP5;PSMC4;TPM3;ACOT2;THAP1
hsa-miR-891b	1957-01-01	0.538347	0.671706	0	0	1.31097	0.81182	SLC39A9
mmu-miR-590-3p	1957-01-01	0.538347	0.671706	0	0	1.31097	0.81182	XRN2
hsa-miR-1587	1957-01-01	0.538347	0.671706	0	0	1.31097	0.81182	RNF4
hsa-miR-6764-3p	1957-01-01	0.538347	0.671706	0	0	1.31097	0.81182	HNRNPA1L2
hsa-miR-4509	1957-01-01	0.538347	0.671706	0	0	1.31097	0.81182	GABPA
hsa-miR-3620-5p	1957-01-01	0.538347	0.671706	0	0	1.31097	0.81182	RNF4
hsa-miR-6769b-3p	3/210	0.538707	0.671816	0	0	1.06375	0.658016	PLSCR1;HNRNPA1L2;PRLR
hsa-miR-4530	2/134	0.540255	0.672384	0	0	1.11219	0.684791	SLC39A9;RSRC1
hsa-miR-6738-5p	2/134	0.540255	0.672384	0	0	1.11219	0.684791	RAB5C;UBE2V1
hsa-miR-605-3p	2/134	0.540255	0.672384	0	0	1.11219	0.684791	ITGB1;AKIRIN1
hsa-miR-5192	2/134	0.540255	0.672384	0	0	1.11219	0.684791	FAM3C;UBE2V1
hsa-miR-6808-5p	9/666	0.541754	0.673434	0	0	1.00495	0.615979	SLC30A6;MFSD14B;SIKE1;CASP8;SENP5;PSMC4;TPM3;ACOT2;THAP1
hsa-miR-3183	3/211	0.541919	0.673434	0	0	1.05858	0.648527	PLSCR1;HNRNPA1L2;PRLR
hsa-miR-4723-3p	3/211	0.541919	0.673434	0	0	1.05858	0.648527	PLSCR1;HNRNPA1L2;PRLR
hsa-miR-1207-5p	4/288	0.543909	0.673674	0	0	1.03359	0.629428	SENP5;PGAM1;HDLBP;MCL1
hsa-miR-5194	2/135	0.544273	0.673674	0	0	1.10377	0.671429	RAB5C;UBE2V1
hsa-miR-1293	2/135	0.544273	0.673674	0	0	1.10377	0.671429	TPM3;RNPS1
hsa-miR-4772-5p	1958-01-01	0.544574	0.673674	0	0	1.2879	0.782726	NCKAP1
hsa-miR-647	1958-01-01	0.544574	0.673674	0	0	1.2879	0.782726	HNRNPA1L2
hsa-miR-4454	1958-01-01	0.544574	0.673674	0	0	1.2879	0.782726	MAPK14
hsa-miR-4536-5p	1958-01-01	0.544574	0.673674	0	0	1.2879	0.782726	ELMOD2
hsa-miR-7154-5p	1958-01-01	0.544574	0.673674	0	0	1.2879	0.782726	FAM3C
hsa-miR-370-5p	1958-01-01	0.544574	0.673674	0	0	1.2879	0.782726	EIF4H
hsa-miR-7150	2/136	0.548266	0.677901	0	0	1.09548	0.658377	HDLBP;MCL1
hsa-miR-2355-3p	1959-01-01	0.550717	0.678208	0	0	1.26563	0.754994	CTBP1
hsa-miR-26a-2-3p	1959-01-01	0.550717	0.678208	0	0	1.26563	0.754994	PLSCR1
hsa-miR-508-3p	1959-01-01	0.550717	0.678208	0	0	1.26563	0.754994	UBE2V1
hsa-miR-488-5p	1959-01-01	0.550717	0.678208	0	0	1.26563	0.754994	PAWR
mmu-miR-703	1959-01-01	0.550717	0.678208	0	0	1.26563	0.754994	TCTN3
hsa-miR-2277-3p	1959-01-01	0.550717	0.678208	0	0	1.26563	0.754994	PRLR
[truncated: 465 more rows]
